# Supplementary material for: Mechanism and selectivity for zinc-mediated cycloaddition of azides with alkynes: a computational study
Source: Royal Society of Chemistry journal article supplement (doi:10.1039/c5ra02703a), 2015-01-01
Supplement: c5ra02703a1.pdf [file c5ra02703a1.pdf]

## Table of contents

|                                                                                                                                                          |          |
|----------------------------------------------------------------------------------------------------------------------------------------------------------|----------|
| 1. “Stepwise mechanism” for the uncatalytic cycloaddition of phenylacetylene and azidobenzene.                                                           | Page S2  |
| 2. The coordination of THF to Zn complex 7.                                                                                                              | Page S2  |
| 3. Completes reference for Gaussian 09                                                                                                                   | Page S3  |
| 4. B3LYP absolute calculation energies, enthalpies, and free energies.                                                                                   | Page S4  |
| 5. B3LYP-D3BJ calculated single point energies in THF                                                                                                    | Page S5  |
| 6. B3LYP geometries for all the optimized compounds and transition states.                                                                               | Page S7  |
| 7. The data of distortion, interaction and total energies of the transition states by B3LYP-D3BJ method in THF solvent.                                  | Page S20 |
| 8. The data of distortion, interaction and total energies along the reaction pathways of the dipolar cycloadditions by B3LYP-D3BJ method in THF solvent. | Page S20 |
| 9. B3LYP-D3BJ geometries for all the optimized distortion–interaction analysis compounds in THF solvent.                                                 | Page S22 |
| 10. The orbital energies of the model complex                                                                                                            | Page S52 |
| 11. The values of proportions which represent the weight of the atomic orbitals in the ground state molecular orbitals                                   | Page S53 |

## 1. "Stepwise mechanism" for the uncatalyzed cycloaddition of phenylacetylene and azidobenzene.

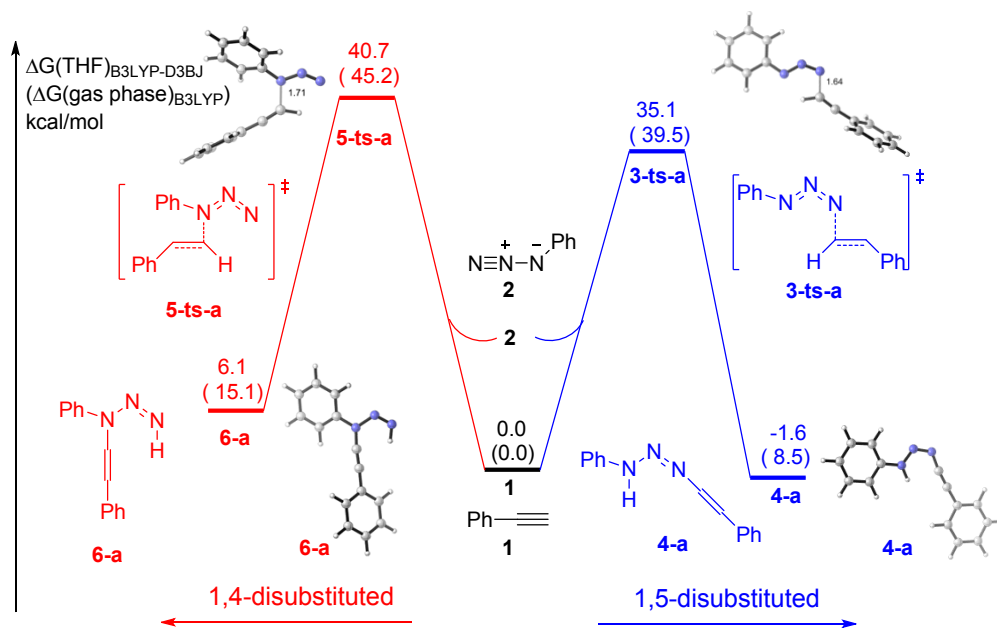

For the uncatalyzed cycloaddition of phenylacetylene and azidobenzene, although many efforts have been devoted to the stepwise mechanism, neither correct transition state nor possible intermediates are obtained. The only result about stepwise mechanism is shown in Figure S1. Two stepwise type transition states **3-ts-a** and **5-ts-a** were obtained in uncatalyzed cycloaddition, however, these transition states would lead to the generation of C-H bond cleavage products **4-a** and **6-a**, which are different from the stepwise intermediates. More importantly, the activation energy of **3-ts-a** and **5-ts-a** are 35.1 and 40.7 kcal/mol, respectively. These barriers are much higher than that in concerted pathway (27.8 and 30.1 kcal/mol, respectively). Thus, this possibility could be ruled out.

## 2. The coordination of THF to Zn complex 7.

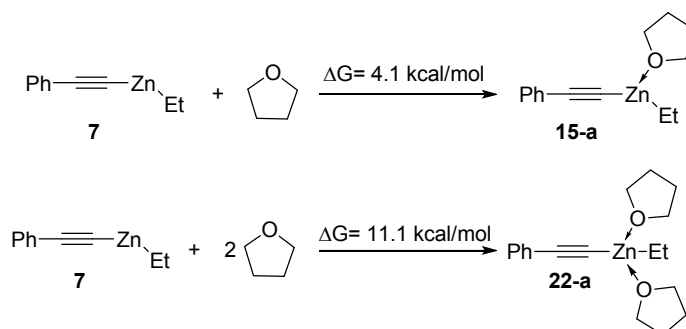

As shown above, the generation of complex **15-a** with one THF coordination towards complex **7** is 4.1 kcal/mol endothermic and the formation of complex **22-a** with two THF coordination is 11.1 kcal/mol endothermic. These data indicate that the coordination ability of THF is weaker than NMA in this system.

### 3. Complete reference for Gaussian 09

Gaussian 09, Revision A.2, Frisch, M. J.; Trucks, G. W.; Schlegel, H. B.; Scuseria, G. E.; Robb, M. A.; Cheeseman, J. R.; Scalmani, G.; Barone, V.; Mennucci, B.; Petersson, G. A.; Nakatsuji, H.; Caricato, M.; Li, X.; Hratchian, H. P.; Izmaylov, A. F.; Bloino, J.; Zheng, G.; Sonnenberg, J. L.; Hada, M.; Ehara, M.; Toyota, K.; Fukuda, R.; Hasegawa, J.; Ishida, M.; Nakajima, T.; Honda, Y.; Kitao, O.; Nakai, H.; Vreven, T.; Montgomery, Jr., J. A.; Peralta, J. E.; Ogliaro, F.; Bearpark, M.; Heyd, J. J.; Brothers, E.; Kudin, K. N.; Staroverov, V. N.; Kobayashi, R.; Normand, J.; Raghavachari, K.; Rendell, A.; Burant, J. C.; Iyengar, S. S.; Tomasi, J.; Cossi, M.; Rega, N.; Millam, N. J.; Klene, M.; Knox, J. E.; Cross, J. B.; Bakken, V.; Adamo, C.; Jaramillo, J.; Gomperts, R.; Stratmann, R. E.; Yazyev, O.; Austin, A. J.; Cammi, R.; Pomelli, C.; Ochterski, J. W.; Martin, R. L.; Morokuma, K.; Zakrzewski, V. G.; Voth, G. A.; Salvador, P.; Dannenberg, J. J.; Dapprich, S.; Daniels, A. D.; Farkas, Ö.; Foresman, J. B.; Ortiz, J. V.; Cioslowski, J.; Fox, D. J. Gaussian, Inc., Wallingford CT, **2009**.

#### 4. B3LYP absolute calculation energies, enthalpies, and free energies.

| Geometry | $E_{(\text{elec})}$ | $H_{(\text{gas phase})}$ | $G_{(\text{gas phase})}$ | IF*    |
|----------|---------------------|--------------------------|--------------------------|--------|
| 1        | -308.465647         | -308.349270              | -308.387127              | -      |
| 2        | -395.934245         | -395.823212              | -395.863110              | -      |
| 3-ts     | -704.366140         | -704.138246              | -704.197406              | -426.3 |
| 4        | -704.490228         | -704.256927              | -704.311414              | -      |
| 5-ts     | -704.363565         | -704.135643              | -704.194428              | -409.4 |
| 6        | -704.495092         | -704.261870              | -704.317212              | -      |
| 7        | -614.266283         | -614.088760              | -614.142473              | -      |
| 8        | -1010.202909        | -1009.912383             | -1009.993978             | -      |
| 9-ts     | -1010.165995        | -1009.877440             | -1009.952947             | -366.5 |
| 10       | -1010.270875        | -1009.978120             | -1010.048074             | -      |
| 11       | -1010.203932        | -1009.913523             | -1009.993134             | -      |
| 12-ts    | -1010.169718        | -1009.881246             | -1009.953129             | -219.0 |
| 13       | -1010.278627        | -1009.985823             | -1010.056156             | -      |
| 14       | -265.592465         | -265.487380              | -265.522733              | -      |
| 15       | -879.876663         | -879.592133              | -879.665924              | -      |
| 16       | -1275.814107        | -1275.416562             | -1275.517106             | -      |
| 17-ts    | -1275.780872        | -1275.385352             | -1275.479155             | -318.4 |
| 18       | -1275.885992        | -1275.486038             | -1275.573094             | -      |
| 19       | -1275.814894        | -1275.417385             | -1275.515838             | -      |
| 20-ts    | -1275.778778        | -1275.383208             | -1275.474381             | -215.6 |
| 21       | -1275.893260        | -1275.493277             | -1275.581386             | -      |
| 22       | -1145.479568        | -1145.088223             | -1145.180255             | -      |
| 23-ts    | -1541.386610        | -1540.884106             | -1540.995104             | -307.5 |
| 24       | -1541.489332        | -1540.982383             | -1541.087969             | -      |
| 25-ts    | -1541.383069        | -1540.880463             | -1540.992246             | -320.5 |
| 26       | -1541.496633        | -1540.880463             | -1540.992246             | -      |
| 27       | -540.4510534        | -540.2410654             | -540.2943794             | -      |
| 28       | -806.0596197        | -805.7416127             | -805.8178567             | -      |

|               |              |              |              |        |
|---------------|--------------|--------------|--------------|--------|
| <b>29</b>     | -1201.995923 | -1201.565945 | -1201.667205 | -      |
| <b>30-ts</b>  | -1201.964711 | -1201.535603 | -1201.631001 | -309.7 |
| <b>31</b>     | -1202.073578 | -1201.639849 | -1201.730105 | -      |
| <b>32</b>     | -1201.99715  | -1201.567105 | -1201.665614 | -      |
| <b>33-ts</b>  | -1201.966448 | -1201.537293 | -1201.631789 | -      |
| <b>34</b>     | -1202.076926 | -1201.643375 | -1201.736511 | -248.7 |
| <b>3-ts-a</b> | -704.354933  | -704.127688  | -704.187211  | -232.0 |
| <b>4-a</b>    | -704.4089583 | -704.1771603 | -704.2367073 | -      |
| <b>5-ts-a</b> | -704.3458948 | -704.1186578 | -704.1781588 | -437.7 |
| <b>6-a</b>    | -704.3975031 | -704.1662891 | -704.2261451 | -      |
| <b>15-a</b>   | -846.7858051 | -846.4836911 | -846.5570321 | -      |
| <b>22-a</b>   | -1079.301263 | -1078.875051 | -1078.964163 | -      |
| <b>THF</b>    | -232.5086688 | -232.3858978 | -232.4210068 | -      |

---

### 5. B3LYP-D3BJ calculated single point energies in THF

| Geometry     | $E_{\text{solv}}$ |
|--------------|-------------------|
| <b>1</b>     | -308.4998506      |
| <b>2</b>     | -395.9685646      |
| <b>3-ts</b>  | -704.44316        |
| <b>4</b>     | -704.5771442      |
| <b>5-ts</b>  | -704.4398549      |
| <b>6</b>     | -704.5789772      |
| <b>7</b>     | -614.3264627      |
| <b>8</b>     | -1010.3019        |
| <b>9-ts</b>  | -1010.270751      |
| <b>10</b>    | -1010.385399      |
| <b>11</b>    | -1010.293188      |
| <b>12-ts</b> | -1010.267887      |
| <b>13</b>    | -1010.394808      |

|                |              |
|----------------|--------------|
| <b>14(NMI)</b> | -265.6286867 |
| <b>15</b>      | -879.9711659 |
| <b>16</b>      | -1275.947146 |
| <b>17-ts</b>   | -1275.918448 |
| <b>18</b>      | -1276.030305 |
| <b>19</b>      | -1275.950606 |
| <b>20-ts</b>   | -1275.916301 |
| <b>21</b>      | -1276.043792 |
| <b>22</b>      | -1145.612712 |
| <b>23-ts</b>   | -1541.56373  |
| <b>24</b>      | -1541.671476 |
| <b>25-ts</b>   | -1541.561171 |
| <b>26</b>      | -1541.689629 |
| <b>27</b>      | -540.4502785 |
| <b>28</b>      | -806.1461237 |
| <b>29</b>      | -1202.123182 |
| <b>30-ts</b>   | -1202.096926 |
| <b>31</b>      | -1202.208939 |
| <b>32</b>      | -1202.124591 |
| <b>33-ts</b>   | -1202.096926 |
| <b>34</b>      | -1202.218448 |
| <b>3-ts-a</b>  | -704.4304989 |
| <b>4-a</b>     | -704.4936797 |
| <b>5-ts-a</b>  | -704.4216436 |
| <b>6-a</b>     | -704.4804201 |
| <b>15-a</b>    | -846.8725841 |
| <b>22-a</b>    | -1079.417592 |
| <b>THF</b>     | -232.535419  |

---

**6. B3LYP geometries for all the optimized compounds and transition states.**

|          |             |             |             |             |             |             |             |
|----------|-------------|-------------|-------------|-------------|-------------|-------------|-------------|
| <b>1</b> |             |             |             |             |             |             |             |
| C        | -2.02218500 | -0.00002100 | -0.00003800 | C           | -0.90797200 | 2.68650900  | -0.01639100 |
| C        | -3.22748400 | 0.00001000  | 0.00005700  | C           | -0.66336900 | 1.32734700  | -0.01124500 |
| C        | -0.59433600 | -0.00002100 | -0.00008900 | C           | -1.60449600 | 0.20088900  | -0.08791500 |
| C        | 0.11933200  | 1.21067000  | -0.00001200 | C           | -2.75959600 | 0.21264900  | 0.70741500  |
| C        | 0.11936200  | -1.21068800 | -0.00000700 | C           | -1.40829600 | -0.86518500 | -0.97804300 |
| C        | 1.51014400  | 1.20655500  | 0.00002000  | C           | -3.69384700 | -0.81590800 | 0.61566600  |
| H        | -0.42641200 | 2.14762800  | 0.00000300  | H           | -2.91700000 | 1.02686900  | 1.40706000  |
| C        | 1.51017500  | -1.20653400 | 0.00001600  | C           | -2.34241500 | -1.89294400 | -1.06488600 |
| H        | -0.42635300 | -2.14766300 | 0.00000900  | H           | -0.52942200 | -0.88384100 | -1.61269000 |
| C        | 2.21001800  | 0.00001900  | 0.00001100  | C           | -3.48736700 | -1.87302200 | -0.26886400 |
| H        | 2.04943700  | 2.14827300  | 0.00005400  | H           | -4.58102100 | -0.79287900 | 1.24015400  |
| H        | 2.04949400  | -2.14823600 | 0.00004300  | H           | -2.17859100 | -2.70846700 | -1.76175400 |
| H        | 3.29515200  | 0.00003100  | 0.00004000  | H           | -4.21444300 | -2.67540100 | -0.33928300 |
| H        | -4.29147200 | 0.00001700  | 0.00010500  | C           | 1.57597300  | 0.12460400  | 0.09334500  |
| <b>2</b> |             |             |             | C           | 2.68952800  | 0.06893200  | -0.74477600 |
| N        | 1.47280600  | -0.87578800 | 0.00001200  | C           | 1.33305700  | -0.88516800 | 1.02400200  |
| N        | 2.41699800  | -0.08546400 | 0.00012300  | C           | 3.56170800  | -1.01233100 | -0.65110600 |
| N        | 3.37087500  | 0.52738600  | -0.00026800 | H           | 2.86730200  | 0.87286800  | -1.44854500 |
| C        | 0.14893900  | -0.36055100 | 0.00005300  | C           | 2.20526900  | -1.96802100 | 1.10054100  |
| C        | -0.87956500 | -1.30759700 | -0.00009200 | H           | 0.47656700  | -0.82082900 | 1.68428000  |
| C        | -0.15550700 | 1.00529600  | 0.00017200  | C           | 3.31949100  | -2.03487300 | 0.26533200  |
| C        | -2.20504200 | -0.88753900 | -0.00012500 | H           | 4.43079400  | -1.05546200 | -1.29899600 |
| H        | -0.62425500 | -2.36119500 | -0.00017900 | H           | 2.01768700  | -2.75461900 | 1.82371800  |
| C        | -1.48733300 | 1.41260000  | 0.00014300  | H           | 3.99932300  | -2.87771400 | 0.33254900  |
| H        | 0.63689800  | 1.74726200  | 0.00029700  | H           | -1.85437100 | 3.20206700  | -0.06550000 |
| C        | -2.51637100 | 0.47257900  | -0.00001000 | <b>5-ts</b> |             |             |             |
| H        | -2.99865400 | -1.62752700 | -0.00024000 | N           | 0.66699200  | -1.29850200 | -0.30733000 |
| H        | -1.71791600 | 2.47300500  | 0.00024000  | N           | -0.45791900 | -1.54454600 | -0.14066700 |
| H        | -3.55155100 | 0.79677400  | -0.00003200 | N           | 1.35852700  | -0.29732600 | -0.65194600 |
| <b>3</b> |             |             |             | C           | -0.25454700 | 1.13368900  | -0.57605000 |
| N        | -1.23293400 | 2.34578500  | -0.23973600 | C           | -1.27841000 | 0.47779100  | -0.35033000 |
| N        | -0.72228900 | 3.38680900  | -0.04888300 | C           | -2.68548100 | 0.28966800  | -0.09192100 |
| N        | -0.85792000 | 1.15129100  | -0.37311700 | C           | -3.37508900 | 1.24195200  | 0.67920600  |
| C        | 1.18393300  | 2.94249700  | 0.23456300  | C           | -3.39649800 | -0.80407300 | -0.60878600 |
| C        | 1.42083700  | 1.73083200  | 0.16002400  | C           | -4.73754800 | 1.10215600  | 0.92161100  |
| C        | 2.02807400  | 0.43876000  | 0.13318700  | H           | -2.83145800 | 2.08727700  | 1.08647200  |
| C        | 2.59865800  | -0.05563300 | -1.05339200 | C           | -4.76196700 | -0.93128800 | -0.37340200 |
| C        | 2.09637200  | -0.34231400 | 1.30004700  | H           | -2.87117300 | -1.55163300 | -1.19004200 |
| C        | 3.22269900  | -1.29790100 | -1.06677900 | C           | -5.43722900 | 0.01730800  | 0.39366200  |
| H        | 2.54435600  | 0.54145500  | -1.95677800 | H           | -5.25436600 | 1.84368700  | 1.52248500  |
| C        | 2.72553600  | -1.58228500 | 1.27809800  | H           | -5.29916000 | -1.77977000 | -0.78493300 |
| H        | 1.65260900  | 0.03134400  | 2.21593900  | H           | -6.50077400 | -0.08929100 | 0.58130700  |
| C        | 3.28900000  | -2.06549500 | 0.09707000  | C           | 2.69470400  | -0.14598700 | -0.23030100 |
| H        | 3.66087700  | -1.66792500 | -1.98805900 | C           | 3.26279300  | -0.88221100 | 0.81888400  |
| H        | 2.77322600  | -2.17494000 | 2.18582300  | C           | 3.45571300  | 0.83091700  | -0.88383300 |
| H        | 3.77753200  | -3.03425800 | 0.08343000  | C           | 4.57922100  | -0.64125200 | 1.19733500  |
| C        | -1.76100900 | 0.08373800  | -0.22350300 | H           | 2.67507800  | -1.64124300 | 1.32385600  |
| C        | -3.05616400 | 0.22817000  | 0.29732300  | C           | 4.76536100  | 1.07584900  | -0.48307300 |
| C        | -1.30140000 | -1.18767800 | -0.59131700 | H           | 3.01618100  | 1.38097400  | -1.70883500 |
| C        | -3.87504700 | -0.88744300 | 0.43398400  | C           | 5.33515200  | 0.34052100  | 0.55558700  |
| H        | -3.41432400 | 1.21180300  | 0.58144600  | H           | 5.01508200  | -1.22189100 | 2.00402200  |
| C        | -2.12630200 | -2.29706000 | -0.43591800 | H           | 5.34712100  | 1.83566400  | -0.99474800 |
| H        | -0.30028800 | -1.29149400 | -0.99354200 | H           | 6.35969200  | 0.52635200  | 0.85941400  |
| C        | -3.41691500 | -2.15517300 | 0.07303000  | H           | 0.37353200  | 1.96224700  | -0.81093800 |
| H        | -4.87881200 | -0.76442300 | 0.82859800  | <b>6</b>    |             |             |             |
| H        | -1.75955500 | -3.27750100 | -0.72251800 | N           | -0.67668600 | -1.60484100 | -0.36517600 |
| H        | -4.06032400 | -3.02133400 | 0.18514900  | N           | -1.09731600 | -0.34306000 | -0.08900000 |
| H        | 1.52707500  | 3.94197400  | 0.39415000  | N           | 0.61765500  | -1.59538500 | -0.36256200 |
| <b>4</b> |             |             |             | C           | -0.02710400 | 0.47578300  | 0.09233800  |
| N        | 1.24773400  | 2.50542800  | 0.01542400  | C           | 1.07667900  | -0.33306900 | -0.08705200 |
| N        | 0.27148200  | 3.35827700  | -0.00522100 | C           | 2.50832800  | -0.02193900 | -0.00707300 |
| N        | 0.70609300  | 1.25437300  | 0.00987600  | C           | 2.96227600  | 1.29955300  | 0.11196800  |
|          |             |             |             | C           | 3.45472000  | -1.05609200 | -0.04910700 |

|          |             |             |             |             |             |             |             |
|----------|-------------|-------------|-------------|-------------|-------------|-------------|-------------|
| C        | 4.32286400  | 1.57974800  | 0.19397000  | H           | 6.20285200  | 0.74910600  | -0.32391100 |
| H        | 2.25127900  | 2.11990200  | 0.13312400  | N           | -0.73764400 | -2.81339900 | -1.07823100 |
| C        | 4.81480100  | -0.77273800 | 0.02971200  | N           | 0.35968200  | -2.63183600 | -0.55962400 |
| H        | 3.11062100  | -2.07902600 | -0.14442000 | N           | 1.43034500  | -2.51659500 | -0.20098400 |
| C        | 5.25605700  | 0.54437400  | 0.15315600  | C           | -1.91492000 | -2.53253300 | -0.33288700 |
| H        | 4.65498600  | 2.60907600  | 0.28496400  | C           | -3.12686500 | -2.80762800 | -0.97248900 |
| H        | 5.53363100  | -1.58527900 | -0.00416900 | C           | -1.90608300 | -2.00932700 | 0.96453600  |
| H        | 6.31724000  | 0.76277700  | 0.21502000  | C           | -4.32580100 | -2.56226700 | -0.31167700 |
| C        | -2.48494100 | -0.03503400 | -0.01949000 | H           | -3.11228400 | -3.21002500 | -1.97895000 |
| C        | -2.93525000 | 1.24062800  | -0.36236800 | C           | -3.11379300 | -1.76879500 | 1.61474900  |
| C        | -3.38520400 | -1.02066600 | 0.38876300  | H           | -0.96897100 | -1.78130700 | 1.46203900  |
| C        | -4.29391700 | 1.53438600  | -0.27675400 | C           | -4.32621300 | -2.04308300 | 0.98341000  |
| H        | -2.23748300 | 1.99181500  | -0.71479100 | H           | -5.26405100 | -2.77844500 | -0.81193900 |
| C        | -4.74169900 | -0.71826900 | 0.45550700  | H           | -3.10275300 | -1.36026700 | 2.61980800  |
| H        | -3.01623900 | -2.00557600 | 0.64443900  | H           | -5.26300500 | -1.85321400 | 1.49604600  |
| C        | -5.20087100 | 0.55793100  | 0.13016500  | <b>9-ts</b> |             |             |             |
| H        | -4.64280100 | 2.52620700  | -0.54406300 | N           | -0.13014900 | -1.95718600 | 0.07130500  |
| H        | -5.44194100 | -1.48429100 | 0.77130900  | N           | 1.05481400  | -1.90496700 | 0.11816600  |
| H        | -6.25915500 | 0.78844700  | 0.18941200  | N           | -1.04888300 | -1.09338400 | 0.02306400  |
| H        | -0.13613200 | 1.51134900  | 0.36392400  | C           | 1.47661600  | 0.00496100  | 0.11633700  |
| <b>7</b> |             |             |             | C           | 0.44871700  | 0.71211400  | 0.06612900  |
| C        | -0.75589500 | -0.07346800 | -0.00002800 | Zn          | 3.37883600  | -0.17473200 | 0.20114500  |
| C        | 0.46222900  | -0.14340300 | -0.00004000 | C           | 5.31525900  | -0.36837700 | 0.29206000  |
| C        | -2.18007800 | 0.00481900  | -0.00001400 | H           | 5.55231600  | -0.78321600 | 1.27835000  |
| C        | -2.96149500 | -1.16487900 | -0.00003000 | H           | 5.74819800  | 0.63826300  | 0.28056000  |
| C        | -2.82996200 | 1.25238000  | 0.00001900  | C           | 5.94478400  | -1.23283300 | -0.81375000 |
| C        | -4.34982600 | -1.08548700 | -0.00001400 | H           | 5.75973500  | -0.82447500 | -1.81160300 |
| H        | -2.46745300 | -2.13013600 | -0.00005400 | H           | 7.03225600  | -1.30246200 | -0.69390100 |
| C        | -4.21880000 | 1.32363700  | 0.00003500  | H           | 5.55642200  | -2.25515500 | -0.80799300 |
| H        | -2.23423300 | 2.15844700  | 0.00003100  | C           | -0.41878700 | 1.84903100  | 0.01145600  |
| C        | -4.98381100 | 0.15712400  | 0.00001900  | C           | -0.91962300 | 2.42528900  | 1.19216400  |
| H        | -4.93942500 | -1.99674100 | -0.00002500 | C           | -0.75612600 | 2.42875400  | -1.22431300 |
| H        | -4.70628900 | 2.29335400  | 0.00005900  | C           | -1.73332300 | 3.55151200  | 1.13434900  |
| H        | -6.06740200 | 0.21608800  | 0.00003200  | H           | -0.66927100 | 1.97784800  | 2.14747100  |
| Zn       | 2.34590700  | -0.25298000 | -0.00000600 | C           | -1.57077700 | 3.55479500  | -1.27357300 |
| C        | 4.28829900  | -0.38147100 | 0.00012000  | H           | -0.37839500 | 1.98473400  | -2.13848400 |
| H        | 4.57938900  | -0.97789600 | 0.87284900  | C           | -2.06286500 | 4.12008600  | -0.09664600 |
| H        | 4.57951700  | -0.97822000 | -0.87234300 | H           | -2.11343900 | 3.98615200  | 2.05322400  |
| C        | 5.04871400  | 0.95669500  | -0.00007100 | H           | -1.82385000 | 3.99188000  | -2.23410700 |
| H        | 4.81418000  | 1.56385600  | 0.87936800  | H           | -2.69981500 | 4.99757000  | -0.13843000 |
| H        | 6.13395000  | 0.80142600  | 0.00004100  | C           | -2.39878900 | -1.49243800 | -0.01019800 |
| H        | 4.81431500  | 1.56352900  | -0.87977100 | C           | -2.81665900 | -2.83262400 | 0.01446200  |
| <b>8</b> |             |             |             | C           | -3.36068000 | -0.47480500 | -0.06949700 |
| C        | 0.50413400  | 1.74430900  | -0.05188000 | C           | -4.17327400 | -3.13762100 | -0.02002900 |
| C        | 1.50994200  | 1.05410000  | -0.01401400 | H           | -2.07656300 | -3.62361000 | 0.06000100  |
| C        | -0.66651500 | 2.55906700  | -0.09855300 | C           | -4.71437900 | -0.79467100 | -0.10287400 |
| C        | -1.94448800 | 1.97920800  | -0.19525900 | H           | -3.03732100 | 0.55922900  | -0.08853200 |
| C        | -0.56265300 | 3.96132900  | -0.04968900 | C           | -5.13132600 | -2.12512000 | -0.07852700 |
| C        | -3.08034700 | 2.78060500  | -0.24302800 | H           | -4.48292100 | -4.17810100 | -0.00065600 |
| H        | -2.03630500 | 0.89945400  | -0.23042100 | H           | -5.44780200 | 0.00431800  | -0.14844200 |
| C        | -1.70305800 | 4.75572300  | -0.09744500 | H           | -6.18771800 | -2.37057200 | -0.10485400 |
| H        | 0.41915700  | 4.41557700  | 0.02508100  | <b>10</b>   |             |             |             |
| C        | -2.96550900 | 4.16990300  | -0.19454800 | N           | -0.80103400 | -2.46200500 | 0.06217300  |
| H        | -4.05905700 | 2.31759900  | -0.31887500 | N           | 0.49221600  | -2.46887200 | 0.02162400  |
| H        | -1.60633700 | 5.83614800  | -0.05951100 | N           | -1.20657900 | -1.15906100 | 0.04181600  |
| H        | -3.85369500 | 4.79238000  | -0.23273700 | C           | 0.98167200  | -1.18123500 | -0.02160500 |
| Zn       | 3.10880000  | 0.03863800  | 0.02404100  | C           | -0.11678200 | -0.32927700 | -0.00851600 |
| C        | 4.81100700  | -0.90620600 | 0.06859800  | Zn          | 2.88608700  | -0.87236400 | -0.18799200 |
| H        | 4.70906600  | -1.72455700 | 0.79075000  | C           | 4.81311200  | -0.60637100 | -0.36468900 |
| H        | 4.93994600  | -1.39315300 | -0.90534900 | H           | 4.98750600  | -0.02921000 | -1.28067600 |
| C        | 6.04899300  | -0.05586800 | 0.40123000  | H           | 5.26330800  | -1.58931300 | -0.54800900 |
| H        | 5.97352000  | 0.41305900  | 1.38707400  | C           | 5.50760000  | 0.07577700  | 0.82740200  |
| H        | 6.96423900  | -0.65992700 | 0.40520900  | H           | 5.38938400  | -0.49448000 | 1.75387800  |



|              |             |             |             |           |             |             |             |
|--------------|-------------|-------------|-------------|-----------|-------------|-------------|-------------|
| H            | 6.58523300  | 0.18691700  | 0.65796600  | N         | -1.10082100 | -0.63429000 | -0.14976200 |
| H            | 5.11152400  | 1.07859300  | 1.01569000  | C         | 1.08814300  | 0.95594500  | -0.06715900 |
| C            | -0.15770500 | 1.13856200  | -0.10971100 | C         | 1.92179300  | -0.00186800 | -0.05969400 |
| C            | 0.65615500  | 1.91562900  | 0.72782000  | Zn        | -0.74675000 | 1.55225200  | -0.04531900 |
| C            | -0.95219800 | 1.78913500  | -1.06560000 | C         | -2.21137500 | 2.85625900  | 0.02988200  |
| C            | 0.68025600  | 3.30364900  | 0.60931700  | H         | -2.99900500 | 2.44608700  | 0.67192400  |
| H            | 1.25584800  | 1.42707400  | 1.48889400  | H         | -2.65682700 | 2.92167000  | -0.97088900 |
| C            | -0.92949100 | 3.17584100  | -1.17955100 | C         | -1.81754900 | 4.26323700  | 0.51061300  |
| H            | -1.58002900 | 1.20551600  | -1.72991200 | H         | -1.06017300 | 4.72071300  | -0.13347900 |
| C            | -0.11326900 | 3.93854300  | -0.34401900 | H         | -2.67759400 | 4.94422000  | 0.52500000  |
| H            | 1.31350000  | 3.88857800  | 1.26863000  | H         | -1.40628200 | 4.25031600  | 1.52479300  |
| H            | -1.54689900 | 3.66211800  | -1.92792800 | C         | 3.35314500  | -0.29167900 | -0.02940500 |
| H            | -0.09707600 | 5.01962000  | -0.43578900 | C         | 3.85970800  | -1.59685700 | -0.04229200 |
| C            | -2.60019500 | -0.86830800 | 0.13903500  | C         | 4.25220300  | 0.78813200  | 0.01345700  |
| C            | -3.49848100 | -1.60004500 | -0.63899600 | C         | 5.23514300  | -1.81495500 | -0.01226600 |
| C            | -3.05926500 | 0.10809500  | 1.02343200  | H         | 3.17698100  | -2.43511700 | -0.07615600 |
| C            | -4.86292700 | -1.34518900 | -0.53167500 | C         | 5.62267800  | 0.56300500  | 0.04322900  |
| H            | -3.12260400 | -2.36545000 | -1.30669900 | H         | 3.86555800  | 1.80131100  | 0.02317100  |
| C            | -4.42526000 | 0.36371500  | 1.11299300  | C         | 6.12082900  | -0.74069800 | 0.03048400  |
| H            | -2.35693900 | 0.65682000  | 1.63909900  | H         | 5.61385600  | -2.83184400 | -0.02303500 |
| C            | -5.32993500 | -0.36027300 | 0.33804300  | H         | 6.30408700  | 1.40692900  | 0.07629700  |
| H            | -5.56171200 | -1.91728900 | -1.13295200 | H         | 7.19154500  | -0.91570400 | 0.05351000  |
| H            | -4.78182800 | 1.12347300  | 1.80052900  | C         | -2.42784400 | -1.16056800 | -0.07718200 |
| H            | -6.39377600 | -0.16199500 | 0.41567300  | C         | -2.71671800 | -2.36349700 | 0.58059500  |
| <b>11</b>    |             |             |             | C         | -3.46644100 | -0.42945500 | -0.65988700 |
| C            | -2.45786500 | 0.43658100  | 0.03185400  | C         | -4.02716900 | -2.82561200 | 0.64083700  |
| C            | -1.34949000 | 0.94701400  | 0.03674400  | H         | -1.91362700 | -2.92929300 | 1.03859700  |
| C            | -3.75424000 | -0.15987400 | 0.02341300  | C         | -4.77698000 | -0.89492900 | -0.58517800 |
| C            | -4.16158600 | -1.00695400 | 1.06985500  | H         | -3.24730600 | 0.49613000  | -1.17873500 |
| C            | -4.65143700 | 0.09032600  | -1.03070900 | C         | -5.06504600 | -2.09431400 | 0.06261500  |
| C            | -5.42694100 | -1.58396400 | 1.05903000  | H         | -4.23839100 | -3.76049900 | 1.15019400  |
| H            | -3.47577500 | -1.20538600 | 1.88594100  | H         | -5.57324200 | -0.31846600 | -1.04477500 |
| C            | -5.91511800 | -0.49052500 | -1.03500500 | H         | -6.08624700 | -2.45623300 | 0.11692400  |
| H            | -4.34540300 | 0.74307700  | -1.84072300 | <b>13</b> |             |             |             |
| C            | -6.30821600 | -1.32910400 | 0.00818300  | N         | 0.70019400  | -2.57017100 | 0.27463200  |
| H            | -5.72644200 | -2.23560100 | 1.87376300  | N         | 1.09572800  | -1.27330700 | 0.17499600  |
| H            | -6.59611700 | -0.28765300 | -1.85550100 | N         | -0.59415000 | -2.57939500 | 0.27525800  |
| H            | -7.29495500 | -1.78079700 | 0.00229000  | C         | 0.02480400  | -0.41887700 | 0.10487100  |
| Zn           | 0.33828600  | 1.81429200  | 0.05432800  | C         | -1.05786900 | -1.29402500 | 0.18170600  |
| C            | 1.87268200  | 3.02438500  | 0.09268700  | Zn        | 0.08065700  | 1.47441200  | -0.32298600 |
| H            | 2.49864300  | 2.75606000  | 0.95214700  | C         | 0.10752200  | 3.36736700  | -0.79096200 |
| H            | 2.48522700  | 2.83140000  | -0.79616800 | H         | -0.46314900 | 3.47986000  | -1.72006100 |
| C            | 1.51105000  | 4.51910600  | 0.16023900  | H         | 1.14118000  | 3.62752000  | -1.04698900 |
| H            | 0.92862700  | 4.76046900  | 1.05454400  | C         | -0.43155300 | 4.33256000  | 0.27939400  |
| H            | 2.40612800  | 5.15252000  | 0.18199100  | H         | 0.13673800  | 4.27460800  | 1.21274700  |
| H            | 0.91695000  | 4.83723800  | -0.70179600 | H         | -0.38162900 | 5.37397500  | -0.05900800 |
| N            | -0.20215000 | -2.30569400 | -0.17476000 | H         | -1.47763100 | 4.12956200  | 0.52735900  |
| N            | 0.68665500  | -1.60999000 | -0.13099600 | C         | -2.49729200 | -1.00236000 | 0.13971200  |
| N            | 1.56763500  | -0.73995800 | -0.08178300 | C         | -3.01261200 | 0.21756700  | 0.60217200  |
| C            | 2.92356600  | -1.18842700 | -0.06902400 | C         | -3.39310600 | -1.95222600 | -0.37435100 |
| C            | 3.90948400  | -0.19905100 | -0.03218500 | C         | -4.37565300 | 0.49424800  | 0.52663200  |
| C            | 3.28802000  | -2.53922600 | -0.09028200 | H         | -2.34958000 | 0.94300800  | 1.06573600  |
| C            | 5.25216900  | -0.56224000 | -0.01700400 | C         | -4.75564300 | -1.67894100 | -0.44051900 |
| H            | 3.61658500  | 0.84323200  | -0.01635200 | H         | -3.00602300 | -2.90308900 | -0.72158100 |
| C            | 4.63582800  | -2.88913500 | -0.07492200 | C         | -5.25331600 | -0.45291100 | 0.00217800  |
| H            | 2.53133400  | -3.31671100 | -0.11853200 | H         | -4.75401100 | 1.44256100  | 0.89521800  |
| C            | 5.62331100  | -1.90646100 | -0.03819900 | H         | -5.43293700 | -2.42560800 | -0.84307000 |
| H            | 6.01161200  | 0.21216400  | 0.01131200  | H         | -6.31644100 | -0.24191900 | -0.05165100 |
| H            | 4.91136300  | -3.93854500 | -0.09171100 | C         | 2.48462700  | -0.96252300 | 0.13927500  |
| H            | 6.67133900  | -2.18544600 | -0.02632100 | C         | 2.97491000  | 0.13880900  | 0.84295900  |
| <b>12-ts</b> |             |             |             | C         | 3.35101500  | -1.77320400 | -0.59612600 |
| N            | -0.15970900 | -1.50949100 | -0.12520800 | C         | 4.33310000  | 0.44634700  | 0.78452000  |
| N            | 1.03796200  | -1.45345700 | -0.10584000 | H         | 2.30704500  | 0.72586000  | 1.46396200  |

|           |             |             |             |
|-----------|-------------|-------------|-------------|
| C         | 4.70814700  | -1.46668900 | -0.63461200 |
| H         | 2.95446700  | -2.63121800 | -1.12425100 |
| C         | 5.20265600  | -0.35410300 | 0.04656300  |
| H         | 4.71109100  | 1.30150000  | 1.33479500  |
| H         | 5.37994300  | -2.09767900 | -1.20683800 |
| H         | 6.26041600  | -0.11741800 | 0.00853300  |
| <b>14</b> |             |             |             |
| N         | -1.47439100 | -0.76733000 | 0.00001800  |
| C         | -0.19945100 | -1.08511600 | -0.00007800 |
| C         | -1.50207900 | 0.60666500  | 0.00014400  |
| H         | 0.20183100  | -2.08870200 | -0.00015500 |
| C         | -0.22701700 | 1.11336000  | -0.00007300 |
| H         | -2.43451300 | 1.15163000  | 0.00026500  |
| H         | 0.15553100  | 2.12195000  | -0.00020200 |
| N         | 0.61059100  | 0.01609000  | -0.00023400 |
| C         | 2.06266800  | 0.03127000  | 0.00017300  |
| H         | 2.42771300  | -0.99553900 | -0.00248700 |
| H         | 2.44578800  | 0.53844000  | -0.88807500 |
| H         | 2.44552000  | 0.53382700  | 0.89117600  |
| <b>15</b> |             |             |             |
| C         | 1.93907500  | 0.34121000  | -0.01750100 |
| C         | 0.77469100  | 0.71086900  | -0.02367700 |
| C         | 3.29972400  | -0.09014200 | -0.00799100 |
| C         | 3.90679200  | -0.59023400 | -1.17528300 |
| C         | 4.06837000  | -0.02573800 | 1.16936800  |
| C         | 5.23300800  | -1.00996900 | -1.16200100 |
| H         | 3.32588300  | -0.64065800 | -2.08979900 |
| C         | 5.39389500  | -0.44752300 | 1.17613200  |
| H         | 3.61223400  | 0.36105000  | 2.07408300  |
| C         | 5.98318300  | -0.94177700 | 0.01218300  |
| H         | 5.68403500  | -1.39068800 | -2.07331600 |
| H         | 5.97046100  | -0.38859300 | 2.09421700  |
| H         | 7.01798300  | -1.26903900 | 0.01960600  |
| Zn        | -1.05996100 | 1.32283500  | -0.03216100 |
| C         | -2.46981700 | 2.71268800  | -0.06097500 |
| H         | -3.11526500 | 2.52168400  | -0.93019900 |
| H         | -3.11588400 | 2.55630300  | 0.81464900  |
| C         | -1.99584700 | 4.17542100  | -0.09013400 |
| H         | -1.38249700 | 4.38627100  | -0.97196600 |
| H         | -2.83155000 | 4.88782000  | -0.10456900 |
| H         | -1.38284300 | 4.42148400  | 0.78279200  |
| N         | -2.11963500 | -0.62715200 | 0.02227700  |
| C         | -3.42277700 | -0.83987100 | 0.02259100  |
| C         | -1.52555600 | -1.86868600 | 0.06126300  |
| H         | -4.18333500 | -0.07424600 | -0.00260900 |
| C         | -2.49403100 | -2.83370500 | 0.08479800  |
| H         | -0.45120000 | -1.96692900 | 0.06919500  |
| H         | -2.44005000 | -3.91007700 | 0.11642900  |
| N         | -3.70478700 | -2.16508500 | 0.05976900  |
| C         | -5.02831000 | -2.77161100 | 0.07229000  |
| H         | -5.17070900 | -3.35932400 | 0.98076100  |
| H         | -5.78032200 | -1.98426100 | 0.04334300  |
| H         | -5.16157800 | -3.41578200 | -0.79848400 |
| <b>16</b> |             |             |             |
| C         | -0.74368300 | -1.75752200 | 0.51571600  |
| C         | 0.27880800  | -1.14703100 | 0.79100700  |
| C         | -1.94594800 | -2.46729200 | 0.21674900  |
| C         | -2.29835400 | -2.77511200 | -1.11092000 |
| C         | -2.81331200 | -2.87463000 | 1.24863200  |
| C         | -3.47342700 | -3.46414400 | -1.39385300 |
| H         | -1.64081600 | -2.46427200 | -1.91558000 |
| C         | -3.98647400 | -3.56407700 | 0.95971700  |
| H         | -2.55229800 | -2.64291300 | 2.27532900  |

|              |             |             |             |
|--------------|-------------|-------------|-------------|
| C            | -4.32307600 | -3.86199100 | -0.36132200 |
| H            | -3.72765600 | -3.69124800 | -2.42459300 |
| H            | -4.64115900 | -3.87110100 | 1.76948900  |
| H            | -5.23875100 | -4.40041100 | -0.58385000 |
| Zn           | 1.89546200  | -0.21698300 | 1.33686800  |
| C            | 2.96564900  | 0.77234200  | 2.67864600  |
| H            | 3.30637400  | 1.70846500  | 2.21493700  |
| H            | 3.88140600  | 0.19639100  | 2.87394100  |
| C            | 2.27014900  | 1.08949900  | 4.01313900  |
| H            | 2.92252800  | 1.63509000  | 4.70824000  |
| H            | 1.37551700  | 1.70390600  | 3.86924200  |
| H            | 1.94563100  | 0.18000700  | 4.52908700  |
| N            | 0.84442000  | 2.54028000  | -0.32903700 |
| N            | -0.17918000 | 3.01101300  | -0.46238900 |
| N            | -1.21085500 | 3.65782800  | -0.63118100 |
| C            | -2.46472200 | 2.98722500  | -0.58320400 |
| C            | -3.59151200 | 3.77847400  | -0.82474700 |
| C            | -2.60477400 | 1.62205600  | -0.31098400 |
| C            | -4.85695000 | 3.20225200  | -0.79537900 |
| H            | -3.45972400 | 4.83456300  | -1.03194500 |
| C            | -3.87836200 | 1.05818500  | -0.28632700 |
| H            | -1.73836200 | 0.99792100  | -0.11357200 |
| C            | -5.00662400 | 1.84122800  | -0.52693800 |
| H            | -5.72914000 | 3.82023100  | -0.98310300 |
| H            | -3.98077200 | -0.00109200 | -0.07633900 |
| N            | 3.18404300  | -0.53171400 | -0.41925400 |
| C            | 4.38417000  | -0.02023300 | -0.62153100 |
| C            | 2.88387700  | -1.26849700 | -1.54241400 |
| H            | 4.91914900  | 0.61506400  | 0.06776300  |
| C            | 3.92483200  | -1.19307900 | -2.42570100 |
| H            | 1.94417100  | -1.79140700 | -1.62628700 |
| H            | 4.07536500  | -1.62266300 | -3.40307500 |
| C            | 6.16934200  | -0.01569300 | -2.38878400 |
| H            | 6.77855400  | -0.90207800 | -2.57381800 |
| H            | 6.03354200  | 0.53057300  | -3.32370700 |
| H            | 6.69188400  | 0.62681300  | -1.68139500 |
| N            | 4.87983300  | -0.39142800 | -1.82684900 |
| H            | -5.99477200 | 1.39403500  | -0.50485600 |
| <b>17-ts</b> |             |             |             |
| N            | -0.85432600 | -1.49401700 | -0.97888200 |
| N            | 0.29882200  | -1.22150700 | -1.06505800 |
| N            | -1.88501600 | -0.91513500 | -0.53294300 |
| C            | 0.52273800  | 0.58690200  | -0.31998500 |
| C            | -0.54623800 | 1.05948300  | 0.11299800  |
| Zn           | 2.42478000  | 1.01742500  | -0.65538400 |
| C            | 3.72306800  | 2.29423000  | -1.43958100 |
| H            | 4.43614100  | 1.71648300  | -2.04255500 |
| H            | 4.31654200  | 2.71387600  | -0.61557100 |
| C            | 3.13428900  | 3.43607000  | -2.28275600 |
| H            | 2.44468700  | 4.05756600  | -1.70273400 |
| H            | 3.91012500  | 4.10437900  | -2.67932100 |
| H            | 2.57017900  | 3.05845100  | -3.14146400 |
| C            | -1.56615800 | 1.87916700  | 0.68612000  |
| C            | -1.82338500 | 1.84293900  | 2.06880800  |
| C            | -2.30742200 | 2.76703900  | -0.11515500 |
| C            | -2.79281900 | 2.66784000  | 2.62882200  |
| H            | -1.25880200 | 1.15875600  | 2.69244000  |
| C            | -3.27519000 | 3.58891000  | 0.45143500  |
| H            | -2.11772500 | 2.79701500  | -1.18214600 |
| C            | -3.52346200 | 3.54293400  | 1.82410100  |
| H            | -2.98034900 | 2.62734700  | 3.69723200  |
| H            | -3.83898600 | 4.26794300  | -0.18034200 |
| H            | -4.28037500 | 4.18465200  | 2.26342700  |

|           |             |             |             |              |             |             |             |
|-----------|-------------|-------------|-------------|--------------|-------------|-------------|-------------|
| C         | -3.12822500 | -1.56827500 | -0.60432800 | H            | 5.20206300  | 0.99701900  | -0.35273400 |
| C         | -3.33053800 | -2.82706700 | -1.19399400 | H            | 6.69104100  | -1.33438500 | -0.24171700 |
| C         | -4.22289900 | -0.89341700 | -0.04418100 | N            | 4.72820500  | -2.20724600 | -0.03643700 |
| C         | -4.60228200 | -3.39094800 | -1.21406500 | C            | 5.05110300  | -3.62294600 | 0.06693800  |
| H         | -2.49014900 | -3.35167400 | -1.63516600 | H            | 4.12637300  | -4.18780700 | 0.17415300  |
| C         | -5.48928200 | -1.46793800 | -0.07176400 | H            | 5.56963500  | -3.96372300 | -0.83110900 |
| H         | -4.06469200 | 0.07920500  | 0.40785100  | H            | 5.68068400  | -3.80926200 | 0.93894100  |
| C         | -5.68990200 | -2.71947700 | -0.65466900 | H            | -6.77747600 | -2.70072000 | 0.41557700  |
| H         | -4.74378400 | -4.36439200 | -1.67429700 | <b>19</b>    |             |             |             |
| H         | -6.32594100 | -0.93203900 | 0.36589500  | C            | 2.21531700  | -0.64480100 | 0.80614300  |
| N         | 3.48195300  | -0.61453100 | 0.31046200  | C            | 1.16533000  | -0.06051500 | 1.02987800  |
| C         | 2.95078400  | -1.76394800 | 0.69121100  | C            | 3.44320300  | -1.32822000 | 0.55249600  |
| C         | 4.82173100  | -0.68355900 | 0.62639800  | C            | 3.66168900  | -1.99264900 | -0.66932100 |
| H         | 1.91528500  | -2.03725100 | 0.55889000  | C            | 4.46738500  | -1.35309400 | 1.51795100  |
| C         | 5.08870300  | -1.89177900 | 1.20633300  | C            | 4.86036500  | -2.65548800 | -0.91334500 |
| H         | 5.49389400  | 0.13289100  | 0.41450100  | H            | 2.87864400  | -1.98422200 | -1.41992900 |
| H         | 5.99968200  | -2.32288200 | 1.58911700  | C            | 5.66396400  | -2.01683100 | 1.26743300  |
| N         | 3.88554100  | -2.57356600 | 1.24079400  | H            | 4.30874000  | -0.84808600 | 2.46449200  |
| C         | 3.66574300  | -3.91604500 | 1.76164500  | C            | 5.86748400  | -2.67080700 | 0.05188100  |
| H         | 4.28513700  | -4.63762300 | 1.22658900  | H            | 5.00851900  | -3.16437300 | -1.86099500 |
| H         | 3.90163000  | -3.95613800 | 2.82642000  | H            | 6.44096100  | -2.02565500 | 2.02570000  |
| H         | 2.61896400  | -4.18189300 | 1.62293300  | H            | 6.80124700  | -3.18959600 | -0.14030600 |
| H         | -6.67918300 | -3.16451800 | -0.67514500 | Zn           | -0.50369900 | 0.88513500  | 1.37341300  |
| <b>18</b> |             |             |             | C            | -2.07577700 | 1.30571600  | 2.50779200  |
| N         | -0.75242700 | -2.19889200 | 0.12789100  | H            | -2.91820200 | 1.58301700  | 1.85947600  |
| N         | 0.40266200  | -1.60892600 | 0.09534900  | H            | -2.39484100 | 0.39660900  | 3.03240300  |
| N         | -1.70157400 | -1.22786800 | 0.06932500  | C            | -1.84123300 | 2.42452200  | 3.53997200  |
| C         | 0.26585300  | -0.23600100 | 0.01792600  | H            | -1.54159600 | 3.36605500  | 3.06607100  |
| C         | -1.10468500 | 0.00867600  | 0.00188700  | H            | -2.73840800 | 2.64125100  | 4.13538600  |
| Zn        | 1.80887000  | 1.01160900  | -0.12698100 | H            | -1.04779200 | 2.16399400  | 4.24820200  |
| C         | 2.53373900  | 2.86079900  | -0.24582700 | N            | -0.18167000 | -0.62255200 | -2.51813100 |
| H         | 1.73464700  | 3.53390700  | -0.57850500 | N            | -0.96266100 | -0.71209900 | -1.70237100 |
| H         | 3.28551700  | 2.89190800  | -1.04643700 | N            | -1.74933100 | -0.68339200 | -0.75526500 |
| C         | 3.15083600  | 3.41026600  | 1.05415300  | N            | -0.28330300 | 2.46037700  | -0.17889000 |
| H         | 3.97152100  | 2.78372000  | 1.42170900  | C            | 0.80842200  | 2.58639000  | -0.91182500 |
| H         | 3.55729700  | 4.42354000  | 0.93231400  | C            | -1.13006800 | 3.47182500  | -0.57299000 |
| H         | 2.41555000  | 3.46302500  | 1.86479400  | H            | 1.67151200  | 1.94075700  | -0.84594900 |
| C         | -1.83095700 | 1.28116600  | -0.14712400 | C            | -0.53190300 | 4.20919600  | -1.55725000 |
| C         | -1.49694200 | 2.37684900  | 0.66137100  | H            | -2.10310800 | 3.59935400  | -0.12506200 |
| C         | -2.82970900 | 1.44577100  | -1.11906300 | H            | -0.86218800 | 5.06936400  | -2.11733900 |
| C         | -2.14206100 | 3.60123500  | 0.50334000  | C            | 1.71355400  | 4.06480300  | -2.72649900 |
| H         | -0.73133600 | 2.26205800  | 1.42068600  | H            | 1.31947100  | 4.00832800  | -3.74262900 |
| C         | -3.47563800 | 2.66871900  | -1.27348700 | H            | 2.02789500  | 5.08874000  | -2.51709900 |
| H         | -3.09253800 | 0.61499500  | -1.76493900 | H            | 2.57965200  | 3.40917900  | -2.65006600 |
| C         | -3.13550500 | 3.75136300  | -0.46251200 | N            | 0.70816300  | 3.63350300  | -1.76552400 |
| H         | -1.86897900 | 4.43761600  | 1.13885900  | C            | -2.76040500 | -1.68280100 | -0.68040300 |
| H         | -4.24178700 | 2.77842000  | -2.03452600 | C            | -3.64553400 | -1.58946800 | 0.39699400  |
| H         | -3.63872600 | 4.70505000  | -0.58541100 | C            | -2.89359400 | -2.71721500 | -1.61288800 |
| C         | -3.07437000 | -1.60343600 | 0.15882800  | C            | -4.66144500 | -2.52924300 | 0.53543100  |
| C         | -3.53499600 | -2.67418500 | -0.60910900 | H            | -3.52516000 | -0.78532200 | 1.11307000  |
| C         | -3.93740900 | -0.93258900 | 1.02605000  | C            | -3.91557800 | -3.65097200 | -1.46190900 |
| C         | -4.86648500 | -3.06852400 | -0.50922200 | H            | -2.20625300 | -2.79969200 | -2.44896600 |
| H         | -2.84613200 | -3.19099700 | -1.26598000 | C            | -4.80313400 | -3.56280400 | -0.39086900 |
| C         | -5.27043400 | -1.32686000 | 1.10881600  | H            | -5.34474800 | -2.45318900 | 1.37487100  |
| H         | -3.56782200 | -0.11438800 | 1.63190400  | H            | -4.01373200 | -4.45264400 | -2.18673800 |
| C         | -5.73917300 | -2.39399000 | 0.34397300  | H            | -5.59628500 | -4.29402600 | -0.27775400 |
| H         | -5.22274100 | -3.90306100 | -1.10429600 | <b>20-ts</b> |             |             |             |
| H         | -5.94056600 | -0.80318800 | 1.78258300  | N            | 0.30577300  | -1.68911600 | -1.01347600 |
| N         | 3.54213800  | -0.34862500 | -0.12438500 | N            | 1.49081900  | -1.48914700 | -1.00050900 |
| C         | 3.48724200  | -1.66577000 | -0.00375400 | N            | -0.68154100 | -1.25944400 | -0.31915500 |
| C         | 4.87695000  | -0.02526100 | -0.24027800 | C            | 1.34442700  | 0.09288300  | 0.84166800  |
| H         | 2.56615400  | -2.22436200 | 0.10001200  | C            | 2.23899700  | -0.44089000 | 0.11568400  |
| C         | 5.62739400  | -1.16640300 | -0.18768000 | Zn           | -0.50928300 | 0.30871300  | 1.47461200  |

|           |             |             |             |           |             |             |             |
|-----------|-------------|-------------|-------------|-----------|-------------|-------------|-------------|
| C         | 3.68744400  | -0.46102700 | -0.08765100 | H         | -3.00011100 | -1.67686400 | -2.62997500 |
| C         | 4.50471100  | 0.23639400  | 0.81933100  | C         | -4.74067000 | -0.00527100 | 0.39819100  |
| C         | 4.29069600  | -1.13867600 | -1.15457300 | H         | -2.90717800 | -0.39184300 | 1.45938100  |
| C         | 5.88475400  | 0.25578200  | 0.65842800  | C         | -5.43451100 | -0.14863600 | -0.80161400 |
| H         | 4.04570700  | 0.75713500  | 1.65268200  | H         | -5.34324300 | -0.87764700 | -2.82664000 |
| C         | 5.67518500  | -1.11432400 | -1.31102000 | H         | -5.22304400 | 0.44978200  | 1.25704800  |
| H         | 3.67355100  | -1.68456300 | -1.85547900 | C         | -0.76202200 | 2.03811700  | 2.61063700  |
| C         | 6.47803600  | -0.41969200 | -0.40934800 | H         | 0.18680800  | 2.50730000  | 2.90481300  |
| H         | 6.49976300  | 0.79682800  | 1.37062900  | H         | -1.38152300 | 2.86353300  | 2.23383500  |
| H         | 6.12669100  | -1.64533100 | -2.14317300 | C         | -1.43080400 | 1.42223000  | 3.85071600  |
| H         | 7.55610600  | -0.40592900 | -0.53375800 | H         | -1.58604100 | 2.15781200  | 4.65076100  |
| C         | -1.96054400 | -1.73044200 | -0.72895100 | H         | -2.41485100 | 0.99955400  | 3.62015900  |
| C         | -2.16554800 | -2.46540500 | -1.90857500 | H         | -0.83364300 | 0.61040100  | 4.27848400  |
| C         | -3.06378200 | -1.42783800 | 0.07768800  | N         | 0.74814000  | 1.97947900  | -0.40479500 |
| C         | -3.44425000 | -2.88415800 | -2.25964600 | C         | 1.35887700  | 1.46476900  | -1.45830900 |
| H         | -1.31927900 | -2.70760800 | -2.54016600 | C         | 1.04949900  | 3.32410800  | -0.40455100 |
| C         | -4.34004600 | -1.85057900 | -0.28429100 | H         | 1.33707900  | 0.42428700  | -1.74384900 |
| H         | -2.91724200 | -0.87214300 | 0.99553600  | C         | 1.84936800  | 3.61011700  | -1.47535900 |
| C         | -4.54205000 | -2.58017500 | -1.45390800 | H         | 0.67498900  | 3.98570000  | 0.36046900  |
| H         | -3.58200800 | -3.45464300 | -3.17323700 | H         | 2.29194300  | 4.53083600  | -1.81991700 |
| H         | -5.18019400 | -1.61064100 | 0.35997200  | C         | 2.83906700  | 2.20726200  | -3.34220700 |
| C         | -1.62670700 | 0.16828100  | 3.11766500  | H         | 3.87826600  | 2.48523900  | -3.15994100 |
| H         | -1.28442300 | 0.95844100  | 3.80011000  | H         | 2.80138500  | 1.15391900  | -3.61546700 |
| H         | -2.67117900 | 0.42628900  | 2.89381100  | H         | 2.44453000  | 2.80101500  | -4.16832900 |
| C         | -1.57915000 | -1.18299800 | 3.85130600  | N         | 2.04082000  | 2.41321300  | -2.14074200 |
| H         | -2.18900800 | -1.18750400 | 4.76483400  | H         | -6.45730000 | 0.20339100  | -0.88613900 |
| H         | -1.94115400 | -2.00464000 | 3.22416200  | <b>22</b> |             |             |             |
| H         | -0.55888000 | -1.44497800 | 4.15001200  | C         | -2.41465700 | -0.09970700 | 0.38895100  |
| N         | -1.17753700 | 2.00872700  | 0.25477600  | C         | -1.22157100 | -0.06113400 | 0.65851800  |
| C         | -0.60401500 | 2.42374300  | -0.85916600 | C         | -3.81073700 | -0.13001400 | 0.09321000  |
| C         | -2.24877100 | 2.84536300  | 0.47032800  | C         | -4.37035100 | -1.16242400 | -0.68434000 |
| H         | 0.27293500  | 1.98481800  | -1.30996500 | C         | -4.67203000 | 0.87673700  | 0.57196900  |
| C         | -2.31221300 | 3.77217300  | -0.53308700 | C         | -5.73169400 | -1.18467200 | -0.97061100 |
| H         | -2.89356400 | 2.72398200  | 1.32619700  | H         | -3.72219500 | -1.94915600 | -1.05560600 |
| H         | -2.99418900 | 4.58518500  | -0.72340400 | C         | -6.03248700 | 0.85007300  | 0.28284600  |
| C         | -0.91060300 | 4.20699900  | -2.59984400 | H         | -4.25640700 | 1.67598700  | 1.17599900  |
| H         | -0.71021400 | 5.25768300  | -2.38367300 | C         | -6.57102800 | -0.17902200 | -0.49038400 |
| H         | -0.01514700 | 3.76130700  | -3.03061900 | H         | -6.14049800 | -1.99252000 | -1.57042700 |
| H         | -1.72235600 | 4.13576500  | -3.32575200 | H         | -6.67694300 | 1.63633100  | 0.66479200  |
| N         | -1.25460700 | 3.49288800  | -1.37833300 | H         | -7.63302600 | -0.19841900 | -0.71403000 |
| H         | -5.53719800 | -2.91069400 | -1.73242300 | Zn        | 0.69775600  | 0.03168000  | 1.11970000  |
| <b>21</b> |             |             |             | C         | 2.00104100  | 0.06564500  | 2.64988200  |
| N         | -1.10484100 | -2.65492400 | -1.15303100 | H         | 3.02932200  | 0.11022500  | 2.25365400  |
| N         | 0.14775500  | -2.85468300 | -0.91639800 | H         | 1.87298500  | 1.01076200  | 3.19603700  |
| N         | -1.45986200 | -1.51272300 | -0.48813800 | C         | 1.90329500  | -1.10113600 | 3.64868000  |
| C         | -0.40546700 | -0.95758100 | 0.19005200  | H         | 2.04896500  | -2.07301400 | 3.16132700  |
| C         | 0.62144600  | -1.85771700 | -0.09903500 | H         | 2.64269700  | -1.04054500 | 4.46082100  |
| Zn        | -0.37446700 | 0.82779400  | 1.08922500  | H         | 0.91653800  | -1.14138800 | 4.12178300  |
| C         | 2.03210700  | -1.83508500 | 0.31307300  | N         | 1.27143100  | 1.78606300  | -0.17750800 |
| C         | 2.46163000  | -1.12473800 | 1.44478200  | C         | 2.36422500  | 2.51855400  | -0.10582700 |
| C         | 2.99580400  | -2.53579700 | -0.43178800 | C         | 0.47521300  | 2.37672400  | -1.13080900 |
| C         | 3.80640700  | -1.09182000 | 1.80510500  | H         | 3.19629000  | 2.34086000  | 0.55881600  |
| H         | 1.73446700  | -0.61842200 | 2.07298100  | C         | 1.10974700  | 3.47798700  | -1.63805700 |
| C         | 4.33818800  | -2.51018000 | -0.06549800 | H         | -0.49775500 | 1.97306900  | -1.36444100 |
| H         | 2.67317200  | -3.10656600 | -1.29500100 | H         | 0.82057100  | 4.19891100  | -2.38606900 |
| C         | 4.75351200  | -1.78284600 | 1.05058300  | N         | 2.32099000  | 3.56137100  | -0.97566300 |
| H         | 4.11177000  | -0.53864300 | 2.68801200  | C         | 3.33805600  | 4.58492900  | -1.15688800 |
| H         | 5.06440100  | -3.06322100 | -0.65367500 | H         | 2.93754200  | 5.57162100  | -0.91625100 |
| H         | 5.80057600  | -1.76462900 | 1.33583600  | H         | 4.17443000  | 4.37690800  | -0.49048200 |
| C         | -2.80258400 | -1.05191300 | -0.58675300 | H         | 3.70279700  | 4.58703600  | -2.18591500 |
| C         | -3.49466400 | -1.20417800 | -1.79089600 | N         | 1.47738300  | -1.55713600 | -0.28709900 |
| C         | -3.43042500 | -0.46498500 | 0.51338400  | C         | 2.64683200  | -2.16223500 | -0.24396100 |
| C         | -4.80851100 | -0.75607000 | -1.89015800 | C         | 0.76463500  | -2.17228700 | -1.28928900 |

|              |             |             |             |           |             |             |             |
|--------------|-------------|-------------|-------------|-----------|-------------|-------------|-------------|
| H            | 3.44658600  | -1.93411100 | 0.44446500  | C         | -2.60484200 | 4.44989100  | -1.59359700 |
| C            | 1.52705200  | -3.15797200 | -1.85512100 | H         | -2.66561100 | 5.36736100  | -1.00582800 |
| H            | -0.24553900 | -1.86762900 | -1.51417400 | H         | -1.57882100 | 4.32380700  | -1.93623800 |
| H            | 1.33096900  | -3.85652600 | -2.65293900 | H         | -3.26077400 | 4.53404500  | -2.46226600 |
| C            | 3.86426600  | -4.02969900 | -1.40673100 | N         | -2.97530700 | 3.30083000  | -0.78018600 |
| H            | 3.58159000  | -5.06906900 | -1.22876000 | H         | 8.04550900  | -1.71542200 | -0.03910300 |
| H            | 4.23204800  | -3.92795300 | -2.42959900 | <b>24</b> |             |             |             |
| H            | 4.66681300  | -3.76470700 | -0.71930700 | N         | 1.30407900  | -2.08511900 | 0.13794300  |
| N            | 2.73315200  | -3.14446600 | -1.17871500 | N         | 0.13492300  | -1.51067600 | 0.12830100  |
| <b>23-ts</b> |             |             |             | N         | 2.23087600  | -1.09725600 | 0.08420600  |
| N            | 2.01388000  | -1.84085100 | 0.57614600  | C         | 0.24025800  | -0.13107200 | 0.07206000  |
| N            | 0.84240200  | -1.93483300 | 0.74375700  | C         | 1.60688000  | 0.13198600  | 0.04322500  |
| N            | 2.82139200  | -0.90108100 | 0.31475800  | Zn        | -1.40209500 | 1.07094300  | -0.05358700 |
| C            | 0.05333700  | -0.14279200 | 0.58483900  | C         | -1.86443600 | 3.01308300  | -0.32081900 |
| C            | 0.91177300  | 0.71370300  | 0.29736000  | H         | -1.80911800 | 3.19741700  | -1.40403900 |
| Zn           | -1.89071500 | -0.47139200 | 1.13518500  | H         | -1.06197900 | 3.63330700  | 0.09949600  |
| C            | -2.77082700 | -0.93715700 | 2.87607300  | C         | -3.21401700 | 3.53425800  | 0.20216500  |
| H            | -2.79340200 | -0.03588100 | 3.50377900  | H         | -3.26645500 | 3.49306700  | 1.29644700  |
| H            | -2.11102400 | -1.63508700 | 3.40688500  | H         | -3.40878900 | 4.58050000  | -0.07589800 |
| C            | -4.18302800 | -1.54063900 | 2.79898400  | H         | -4.06258100 | 2.94936100  | -0.17504100 |
| H            | -4.20238300 | -2.46292900 | 2.20749200  | C         | 2.31361900  | 1.41559100  | -0.10130900 |
| H            | -4.59576000 | -1.79157200 | 3.78682100  | C         | 3.32745200  | 1.59498000  | -1.05525800 |
| H            | -4.90262200 | -0.85721200 | 2.32956400  | C         | 1.94558200  | 2.50934500  | 0.69510800  |
| C            | 1.60919600  | 1.91647600  | -0.03081700 | C         | 3.95728100  | 2.82746600  | -1.20136200 |
| C            | 1.89695200  | 2.24646400  | -1.36996800 | H         | 3.61513300  | 0.76786400  | -1.69530200 |
| C            | 1.98472100  | 2.82623900  | 0.97634600  | C         | 2.57435300  | 3.74294600  | 0.54563500  |
| C            | 2.53516200  | 3.44139500  | -1.68678300 | H         | 1.15973900  | 2.38590800  | 1.43141400  |
| H            | 1.63157100  | 1.54335500  | -2.15229300 | C         | 3.58524200  | 3.90662700  | -0.40003300 |
| C            | 2.62287400  | 4.01928700  | 0.65295300  | H         | 4.73539700  | 2.94726700  | -1.94887800 |
| H            | 1.77511100  | 2.57872600  | 2.01085000  | H         | 2.27238000  | 4.57787500  | 1.17006500  |
| C            | 2.90143700  | 4.33414800  | -0.67793200 | H         | 4.07491500  | 4.86828200  | -0.51663400 |
| H            | 2.75751900  | 3.67301200  | -2.72409900 | C         | 3.60914400  | -1.44885900 | 0.17132900  |
| H            | 2.90930000  | 4.70505300  | 1.44431500  | C         | 4.09094100  | -2.50704900 | -0.60171300 |
| H            | 3.40533400  | 5.26280400  | -0.92615000 | C         | 4.46109600  | -0.76841800 | 1.04269100  |
| C            | 4.19376100  | -1.18855600 | 0.23363400  | C         | 5.42891700  | -2.79114000 | -0.50275400 |
| C            | 4.75861100  | -2.45505000 | 0.46170800  | H         | 3.41206600  | -3.03173700 | -1.26270200 |
| C            | 5.03974200  | -0.11710300 | -0.09209100 | C         | 5.80068800  | -1.13992500 | 1.12480900  |
| C            | 6.13450200  | -2.63512700 | 0.36049400  | H         | 4.07730800  | 0.04168400  | 1.65044200  |
| H            | 4.11372400  | -3.28747800 | 0.72105600  | C         | 6.28924900  | -2.19473900 | 0.35521600  |
| C            | 6.41368000  | -0.30980600 | -0.18851600 | H         | 5.80020500  | -3.70375900 | -1.10265900 |
| H            | 4.60310200  | 0.86067200  | -0.26289500 | H         | 6.46098300  | -0.60722900 | 1.80134500  |
| C            | 6.97307200  | -1.56833800 | 0.03552200  | N         | -2.64572100 | 0.10361300  | 1.58764400  |
| H            | 6.55506200  | -3.62012700 | 0.54109900  | C         | -2.34782200 | -1.08522500 | 2.07911300  |
| H            | 7.05255200  | 0.53162700  | -0.43952700 | C         | -3.76889800 | 0.52492300  | 2.26403400  |
| N            | -2.53689300 | -1.79371300 | -0.51830300 | H         | -1.52073500 | -1.69706100 | 1.74681100  |
| C            | -1.76989200 | -2.75499100 | -0.99878100 | C         | -4.14360500 | -0.42702300 | 3.17283900  |
| C            | -3.74771300 | -1.91161600 | -1.16164900 | H         | -4.22842200 | 1.47718500  | 2.05465000  |
| H            | -0.74978900 | -2.93860300 | -0.69509200 | H         | -4.95407100 | -0.46961000 | 3.88296100  |
| C            | -3.69945600 | -2.95851400 | -2.04105300 | N         | -3.22740500 | -1.45451000 | 3.04535400  |
| H            | -4.56671600 | -1.24143700 | -0.95338700 | C         | -3.19967400 | -2.69250900 | 3.80782300  |
| H            | -4.43116200 | -3.36678800 | -2.71967200 | H         | -3.06760000 | -2.48688600 | 4.87204200  |
| N            | -2.42916600 | -3.49137500 | -1.92798900 | H         | -4.12518000 | -3.25368700 | 3.66368000  |
| C            | -1.89682200 | -4.62912900 | -2.66275000 | H         | -2.36408800 | -3.30039200 | 3.46331600  |
| H            | -2.47658500 | -5.52917600 | -2.44958000 | N         | -2.54138500 | -0.06098200 | -1.65103300 |
| H            | -1.91560200 | -4.43473700 | -3.73676700 | C         | -2.32242900 | -1.32347900 | -1.96461000 |
| H            | -0.86538700 | -4.79640000 | -2.35586400 | C         | -3.50277000 | 0.39049700  | -2.52499100 |
| N            | -2.82639400 | 1.35739400  | 0.26211000  | H         | -1.60868500 | -1.96440900 | -1.46583600 |
| C            | -2.20355700 | 2.21532600  | -0.52313400 | C         | -3.86439400 | -0.62088700 | -3.37339300 |
| C            | -4.05808700 | 1.91092100  | 0.53083500  | H         | -3.86269000 | 1.40687700  | -2.48887900 |
| H            | -1.20104300 | 2.09726100  | -0.90384000 | H         | -4.57048100 | -0.66529800 | -4.18727600 |
| C            | -4.16927200 | 3.11517700  | -0.10936700 | C         | -3.11780800 | -3.02998300 | -3.62571700 |
| H            | -4.76945200 | 1.41637300  | 1.17356200  | H         | -2.83956200 | -2.96173700 | -4.67934100 |
| H            | -4.96255100 | 3.84468000  | -0.14428700 | H         | -2.39792600 | -3.66890300 | -3.11579600 |

|              |             |             |             |
|--------------|-------------|-------------|-------------|
| H            | -4.10812000 | -3.48306300 | -3.54544100 |
| N            | -3.10260900 | -1.71481900 | -3.00552100 |
| H            | 7.33284300  | -2.48338000 | 0.42588000  |
| <b>25-ts</b> |             |             |             |
| N            | -1.30874800 | 2.87148800  | -0.08176100 |
| N            | -0.22530200 | 3.28890900  | 0.11278800  |
| N            | -1.79297700 | 1.74835500  | -0.41870500 |
| C            | 0.45926700  | 0.73328000  | -0.49101700 |
| C            | 1.06302700  | 1.80063900  | -0.21068500 |
| Zn           | 0.01365300  | -1.17887200 | -0.94423600 |
| C            | 2.35366800  | 2.44116400  | -0.03071000 |
| C            | 3.40059600  | 2.16560300  | -0.92952800 |
| C            | 2.60683900  | 3.31559700  | 1.03859500  |
| C            | 4.65820400  | 2.73673500  | -0.75487700 |
| H            | 3.20991600  | 1.50974100  | -1.77189600 |
| C            | 3.86843200  | 3.87855700  | 1.21287900  |
| H            | 1.80320300  | 3.55630400  | 1.72379600  |
| C            | 4.90081800  | 3.59304500  | 0.31957300  |
| H            | 5.44852100  | 2.51929900  | -1.46719900 |
| H            | 4.04298900  | 4.55139100  | 2.04708300  |
| H            | 5.88022600  | 4.04176400  | 0.45242900  |
| C            | -3.18695700 | 1.60180400  | -0.52564500 |
| C            | -4.11450400 | 2.57838700  | -0.12300200 |
| C            | -3.66029800 | 0.38968300  | -1.05020800 |
| C            | -5.47957600 | 2.33855000  | -0.24687800 |
| H            | -3.75699900 | 3.52205000  | 0.27457400  |
| C            | -5.02776600 | 0.16156600  | -1.16495500 |
| H            | -2.94612600 | -0.35831500 | -1.37379300 |
| C            | -5.94841800 | 1.13042500  | -0.76411000 |
| H            | -6.18253500 | 3.10669700  | 0.06189300  |
| H            | -5.37491100 | -0.77948200 | -1.58049400 |
| C            | -0.57210200 | -2.26336500 | -2.52568000 |
| H            | -0.54670600 | -3.33091800 | -2.25802000 |
| H            | -1.63014800 | -2.05618600 | -2.73618500 |
| C            | 0.24293700  | -2.05021500 | -3.81339700 |
| H            | -0.10473300 | -2.67346700 | -4.64976200 |
| H            | 0.19504800  | -1.01014100 | -4.15342200 |
| H            | 1.30485200  | -2.28173300 | -3.66862600 |
| N            | -1.19089500 | -1.74879500 | 0.81560300  |
| C            | -1.61766100 | -0.89757300 | 1.72869400  |
| C            | -1.79667100 | -2.95149000 | 1.10091500  |
| H            | -1.35186400 | 0.14701500  | 1.77099200  |
| C            | -2.59431100 | -2.81177100 | 2.20328300  |
| H            | -1.62610400 | -3.82728800 | 0.49460400  |
| H            | -3.22695600 | -3.50779100 | 2.73044200  |
| C            | -3.17699400 | -0.84584700 | 3.69365200  |
| H            | -4.25081000 | -0.82684800 | 3.49910000  |
| H            | -2.98742100 | -1.37081100 | 4.63155000  |
| H            | -2.82152400 | 0.17924500  | 3.78711400  |
| N            | -2.47062700 | -1.49281500 | 2.59791300  |
| N            | 1.94076100  | -2.05096100 | -0.18324900 |
| C            | 2.87096300  | -1.37614200 | 0.46508100  |
| C            | 2.45180200  | -3.31358400 | -0.37828800 |
| H            | 2.79965300  | -0.34113700 | 0.76235800  |
| C            | 3.70533300  | -3.39063000 | 0.16533500  |
| H            | 1.89234400  | -4.07254000 | -0.90258100 |
| H            | 4.42350000  | -4.19338900 | 0.21591800  |
| C            | 5.18052900  | -1.72547800 | 1.38396700  |
| H            | 5.30665800  | -2.27433700 | 2.31938200  |
| H            | 6.05012300  | -1.89517700 | 0.74691500  |
| H            | 5.11411300  | -0.66101200 | 1.60426300  |
| N            | 3.96453700  | -2.14350000 | 0.70165800  |
| H            | -7.01407900 | 0.95082800  | -0.86105800 |

|           |             |             |             |
|-----------|-------------|-------------|-------------|
| <b>26</b> |             |             |             |
| N         | -0.71505800 | -3.12399200 | -1.15480800 |
| N         | 0.57181100  | -3.12212500 | -1.19143400 |
| N         | -1.09157300 | -2.06842500 | -0.35915900 |
| C         | -0.01497600 | -1.35980500 | 0.12465700  |
| C         | 1.04837800  | -2.08759100 | -0.42119600 |
| Zn        | -0.08368800 | 0.42798800  | 1.12858300  |
| C         | 2.50081100  | -1.91336900 | -0.26687100 |
| C         | 3.05698200  | -1.33868400 | 0.88586700  |
| C         | 3.37528200  | -2.34804000 | -1.27767300 |
| C         | 4.43479100  | -1.18154500 | 1.01502200  |
| H         | 2.40540300  | -1.03032600 | 1.69572100  |
| C         | 4.75297900  | -2.19524800 | -1.14556800 |
| H         | 2.95875100  | -2.81929800 | -2.16086200 |
| C         | 5.29145300  | -1.60562100 | -0.00082300 |
| H         | 4.84059000  | -0.74089000 | 1.92069200  |
| H         | 5.40994600  | -2.54520700 | -1.93667500 |
| H         | 6.36615300  | -1.49342700 | 0.10545600  |
| C         | -2.47865500 | -1.91013200 | -0.09096300 |
| C         | -3.41026700 | -2.22882200 | -1.08459400 |
| C         | -2.91670000 | -1.47091500 | 1.15940400  |
| C         | -4.77132600 | -2.09214500 | -0.82567600 |
| H         | -3.05799300 | -2.59731200 | -2.04000800 |
| C         | -4.28015900 | -1.32478000 | 1.40368900  |
| H         | -2.19507800 | -1.25641500 | 1.93793200  |
| C         | -5.21347100 | -1.63308800 | 0.41538300  |
| H         | -5.48919100 | -2.35003300 | -1.59824000 |
| H         | -4.61109200 | -0.98234400 | 2.37885100  |
| C         | -0.17938800 | 1.07686100  | 3.03437300  |
| H         | -0.13473000 | 2.17698600  | 3.04281500  |
| H         | -1.17358600 | 0.84019200  | 3.43999400  |
| C         | 0.88933500  | 0.53201000  | 3.99856100  |
| H         | 0.78560800  | 0.91997500  | 5.02193500  |
| H         | 0.85058600  | -0.56059200 | 4.07227500  |
| H         | 1.90414500  | 0.78617100  | 3.66988900  |
| N         | -1.67503500 | 1.56999200  | 0.03034800  |
| C         | -2.16078800 | 1.35948500  | -1.17679000 |
| C         | -2.36426000 | 2.64883000  | 0.53469400  |
| H         | -1.85439200 | 0.57307500  | -1.84897800 |
| C         | -3.27346300 | 3.08577100  | -0.38958000 |
| H         | -2.16387900 | 3.02953600  | 1.52366000  |
| H         | -3.99300000 | 3.88860000  | -0.37264400 |
| C         | -3.91294600 | 2.29812400  | -2.71193300 |
| H         | -4.96849700 | 2.11489200  | -2.50344400 |
| H         | -3.80419200 | 3.26908600  | -3.19865500 |
| H         | -3.55266600 | 1.52435200  | -3.38849600 |
| N         | -3.13444900 | 2.25309200  | -1.48351500 |
| N         | 1.49835400  | 1.62980700  | 0.11596100  |
| C         | 2.13280300  | 1.36630100  | -1.00997800 |
| C         | 2.07955500  | 2.77018500  | 0.62209500  |
| H         | 1.94894100  | 0.51761800  | -1.64976900 |
| C         | 3.07480500  | 3.18932000  | -0.21780900 |
| H         | 1.74893700  | 3.20433700  | 1.55253800  |
| H         | 3.75539300  | 4.02432200  | -0.17178700 |
| C         | 4.02998400  | 2.27262000  | -2.37970600 |
| H         | 3.97214900  | 3.21164900  | -2.93316100 |
| H         | 5.05105300  | 2.12239700  | -2.02510300 |
| H         | 3.77104000  | 1.45248100  | -3.04751200 |
| N         | 3.09895200  | 2.28327900  | -1.26105500 |
| H         | -6.27530300 | -1.52920500 | 0.61418900  |
| <b>27</b> |             |             |             |
| C         | 0.91224900  | 0.68424900  | -0.00004800 |
| C         | -0.25731200 | 0.34470600  | -0.00005500 |

|           |             |             |             |              |             |             |             |
|-----------|-------------|-------------|-------------|--------------|-------------|-------------|-------------|
| Zn        | -2.06720800 | -0.17673700 | -0.00004900 | H            | -3.80921300 | 1.63126200  | 2.42511400  |
| C         | -3.93543600 | -0.72887700 | -0.00005600 | C            | -2.29108200 | 1.52312400  | 3.96596100  |
| H         | -4.09023100 | -1.37466100 | -0.87262100 | H            | -2.99362100 | 1.55853800  | 4.80977200  |
| H         | -4.09014700 | -1.37498600 | 0.87228200  | H            | -1.45102300 | 0.89445700  | 4.27908200  |
| C         | -4.97082000 | 0.41012500  | 0.00021200  | H            | -1.89372700 | 2.53562700  | 3.84036300  |
| H         | -4.87457400 | 1.05413100  | -0.87910200 | N            | -0.72292300 | -2.37089200 | 0.97649500  |
| H         | -5.99621100 | 0.02186400  | 0.00019100  | N            | 0.21857700  | -2.56512500 | 0.37664900  |
| H         | -4.87448300 | 1.05379600  | 0.87976100  | N            | 1.14959400  | -2.85422000 | -0.37451200 |
| C         | 2.32192400  | 1.06489500  | -0.00004900 | C            | 2.47466100  | -2.52324400 | 0.01480900  |
| H         | 2.52651900  | 1.69408400  | 0.87539400  | C            | 3.49571900  | -2.99660300 | -0.81496800 |
| H         | 2.52653300  | 1.69402700  | -0.87553000 | C            | 2.78710900  | -1.76572700 | 1.14890000  |
| C         | 3.28268600  | -0.14144100 | -0.00000200 | C            | 4.82306400  | -2.71987700 | -0.50479800 |
| H         | 3.07083200  | -0.76441300 | 0.87597800  | H            | 3.23403600  | -3.57859200 | -1.69153700 |
| H         | 3.07087200  | -0.76445400 | -0.87596300 | C            | 4.12011100  | -1.49835100 | 1.44946600  |
| C         | 4.75614500  | 0.27514800  | 0.00002000  | H            | 1.99909600  | -1.36920100 | 1.77998400  |
| H         | 4.95698900  | 0.90500000  | 0.87581500  | C            | 5.14308900  | -1.97231200 | 0.62898200  |
| H         | 4.95703800  | 0.90492800  | -0.87581600 | H            | 5.61081700  | -3.09210500 | -1.15184600 |
| C         | 5.71449000  | -0.91824300 | 0.00009900  | H            | 4.35648900  | -0.90826100 | 2.32899100  |
| H         | 5.56540200  | -1.54865200 | -0.88210500 | N            | -3.12034300 | 0.22379700  | -0.57892200 |
| H         | 6.75878800  | -0.59336800 | 0.00010700  | C            | -4.39437500 | -0.11136800 | -0.50301900 |
| H         | 5.56536100  | -1.54856300 | 0.88236000  | C            | -2.75599800 | 0.06119400  | -1.89592400 |
| <b>28</b> |             |             |             | H            | -4.99392400 | -0.09789100 | 0.39458200  |
| C         | 2.08537100  | -0.15917700 | -0.68141800 | C            | -3.83377700 | -0.37801500 | -2.61418600 |
| C         | 1.00233600  | 0.35593700  | -0.46142100 | H            | -1.74814700 | 0.27189200  | -2.21820700 |
| Zn        | -0.68374100 | 1.22566100  | -0.11683500 | H            | -3.95642600 | -0.62078700 | -3.65756000 |
| C         | -1.85991600 | 2.78944500  | 0.19540700  | C            | -6.23479800 | -0.92160000 | -2.00977100 |
| H         | -2.65431300 | 2.77208100  | -0.56464200 | H            | -6.69689900 | -0.26046100 | -2.74500000 |
| H         | -2.37783000 | 2.63795000  | 1.15341800  | H            | -6.23300700 | -1.94298400 | -2.39454300 |
| C         | -1.18572700 | 4.17176100  | 0.19483200  | H            | -6.82502200 | -0.89372200 | -1.09475600 |
| H         | -0.69271200 | 4.38275600  | -0.75959500 | N            | -4.87816400 | -0.48551800 | -1.71335600 |
| H         | -1.89812600 | 4.98854100  | 0.37361300  | H            | 6.17919100  | -1.75894300 | 0.86921300  |
| H         | -0.41437100 | 4.24765900  | 0.96802700  | C            | 2.19177400  | 1.48401900  | -1.19447300 |
| N         | -2.04266800 | -0.54520400 | -0.02210000 | H            | 2.85130500  | 0.62371400  | -1.02269500 |
| C         | -3.34595900 | -0.56184100 | 0.18527300  | H            | 2.01388200  | 1.51125900  | -2.27786600 |
| C         | -1.65822100 | -1.85870500 | -0.16686200 | C            | 2.92037700  | 2.77471000  | -0.77076500 |
| H         | -3.96765800 | 0.30701600  | 0.33975900  | H            | 2.25324800  | 3.62894900  | -0.93245500 |
| C         | -2.75333600 | -2.66864300 | -0.04307600 | H            | 3.10951100  | 2.73740100  | 0.30793000  |
| H         | -0.62553200 | -2.11253400 | -0.34879100 | C            | 4.23560500  | 2.99071500  | -1.52433800 |
| H         | -2.86946900 | -3.73948900 | -0.09196700 | H            | 4.03632400  | 3.02024400  | -2.60328500 |
| N         | -3.82933900 | -1.82882400 | 0.18231600  | H            | 4.89330400  | 2.12717600  | -1.36391200 |
| C         | -5.21459100 | -2.23058400 | 0.37852100  | C            | 4.96405600  | 4.27064600  | -1.10702600 |
| H         | -5.30591700 | -2.87431900 | 1.25514400  | H            | 5.21327100  | 4.25750800  | -0.04111900 |
| H         | -5.82403100 | -1.34116000 | 0.53320500  | H            | 5.89780200  | 4.40114000  | -1.66203600 |
| H         | -5.58687900 | -2.76201000 | -0.49907400 | H            | 4.34693000  | 5.15679600  | -1.28695600 |
| C         | 3.40029000  | -0.75213600 | -0.92448400 | <b>30-ts</b> |             |             |             |
| H         | 3.30279100  | -1.83994800 | -1.03988100 | N            | 0.88003500  | -1.29803000 | 0.88839200  |
| H         | 3.79265300  | -0.38677500 | -1.88270500 | N            | -0.24839100 | -0.95591200 | 1.02399000  |
| C         | 4.42427900  | -0.45194200 | 0.18795400  | N            | 1.87614800  | -0.86407000 | 0.23383300  |
| H         | 4.03093400  | -0.82129300 | 1.14190900  | C            | -0.49492000 | 0.68998500  | -0.04511800 |
| H         | 4.51818300  | 0.63404400  | 0.29889700  | C            | 0.54787000  | 1.02554300  | -0.63441200 |
| C         | 5.79888200  | -1.06985600 | -0.08300900 | Zn           | -2.35125700 | 1.22100800  | 0.36878400  |
| H         | 5.69327700  | -2.15567000 | -0.20446800 | C            | -3.56386000 | 2.63928300  | 1.04037600  |
| H         | 6.18339600  | -0.69694000 | -1.04095800 | H            | -4.19567700 | 2.19543500  | 1.82128600  |
| C         | 6.81750500  | -0.77866400 | 1.02153900  | H            | -4.25495500 | 2.90534400  | 0.22862900  |
| H         | 7.78906600  | -1.23082700 | 0.80126400  | C            | -2.89019000 | 3.91103500  | 1.57975200  |
| H         | 6.97522700  | 0.29758400  | 1.14423200  | H            | -2.28182900 | 4.40556000  | 0.81548700  |
| H         | 6.48211000  | -1.17185600 | 1.98661700  | H            | -3.61905300 | 4.65147300  | 1.93538700  |
| <b>29</b> |             |             |             | H            | -2.22231900 | 3.69268300  | 2.41901600  |
| C         | 0.92549700  | 1.27122800  | -0.49333100 | C            | 3.10158600  | -1.54407100 | 0.36021900  |
| C         | -0.12349500 | 1.11763300  | 0.10968100  | C            | 3.34942700  | -2.56069300 | 1.29871900  |
| Zn        | -1.78619300 | 0.89624100  | 1.06954300  | C            | 4.13599100  | -1.15775300 | -0.50512900 |
| C         | -2.94348100 | 1.00102400  | 2.67492200  | C            | 4.59835800  | -3.17014800 | 1.35716700  |
| H         | -3.35990200 | 0.00028500  | 2.85722800  | H            | 2.55990300  | -2.86242700 | 1.97783600  |

|           |             |             |             |           |             |             |             |
|-----------|-------------|-------------|-------------|-----------|-------------|-------------|-------------|
| C         | 5.38253400  | -1.77173200 | -0.43517300 | C         | 4.93055400  | -3.50777700 | -0.67930900 |
| H         | 3.94850400  | -0.37773200 | -1.23446200 | H         | 3.99719100  | -4.06734600 | -0.64227600 |
| C         | 5.62452300  | -2.78262700 | 0.49456500  | H         | 5.40127700  | -3.67174700 | -1.65040600 |
| H         | 4.77203700  | -3.95366900 | 2.08881200  | H         | 5.59197000  | -3.87382300 | 0.10808900  |
| H         | 6.16916400  | -1.45899100 | -1.11506500 | H         | -6.86588200 | -2.42319600 | 0.51803900  |
| H         | 6.59714100  | -3.26031200 | 0.54760000  | C         | -1.83588700 | 1.41938900  | 0.46046000  |
| N         | -3.50565200 | -0.51920700 | -0.23088900 | H         | -2.59660600 | 1.37117700  | 1.24653600  |
| C         | -4.87121800 | -0.62673100 | -0.38212100 | H         | -1.10130000 | 2.15789600  | 0.79490000  |
| C         | -3.00648800 | -1.71189400 | -0.50604100 | C         | -2.49084100 | 1.91274600  | -0.84437700 |
| C         | -5.18664500 | -1.90292800 | -0.75537300 | H         | -1.72347600 | 1.97250400  | -1.62493700 |
| H         | -5.52517100 | 0.21399900  | -0.21230800 | H         | -3.22183400 | 1.17265600  | -1.19092900 |
| H         | -1.95977400 | -1.96842200 | -0.45519900 | C         | -3.17689200 | 3.27295000  | -0.68685600 |
| H         | -6.12930500 | -2.37993300 | -0.97010800 | H         | -3.94013900 | 3.20602700  | 0.09880100  |
| C         | -3.81019400 | -3.99022500 | -1.17892000 | H         | -2.44455900 | 4.00959200  | -0.33336100 |
| H         | -4.18753800 | -4.18368900 | -2.18442200 | C         | -3.82094700 | 3.77480600  | -1.98109600 |
| H         | -2.74865900 | -4.23093600 | -1.14955400 | H         | -3.07857900 | 3.89000800  | -2.77724200 |
| H         | -4.33524800 | -4.62873100 | -0.46657000 | H         | -4.58411000 | 3.07827200  | -2.34289000 |
| N         | -3.98652600 | -2.58696400 | -0.83043500 | H         | -4.30311100 | 4.74619500  | -1.83811300 |
| C         | 1.56925200  | 1.72812500  | -1.41424300 | <b>32</b> |             |             |             |
| H         | 1.04944800  | 2.45027500  | -2.05971000 | C         | 2.29732200  | -1.35730600 | 0.76458200  |
| H         | 2.07163300  | 1.03095100  | -2.09264700 | C         | 1.37082000  | -0.60083900 | 1.00409300  |
| C         | 2.60920000  | 2.47623400  | -0.56037400 | Zn        | -0.12028000 | 0.56413300  | 1.44277300  |
| H         | 2.08650800  | 3.17779800  | 0.09928900  | C         | -1.50579100 | 1.24121500  | 2.69404700  |
| H         | 3.11275700  | 1.75864600  | 0.09426700  | H         | -2.30486600 | 1.73226800  | 2.12174100  |
| C         | 3.63843400  | 3.22889300  | -1.40874300 | H         | -1.98373800 | 0.39097800  | 3.19691600  |
| H         | 3.12145000  | 3.93553300  | -2.07057700 | C         | -0.97516200 | 2.21928100  | 3.75926500  |
| H         | 4.15436800  | 2.52125200  | -2.07050600 | H         | -0.51067000 | 3.10422400  | 3.30964600  |
| C         | 4.67099300  | 3.98173100  | -0.56640500 | H         | -1.76664000 | 2.58285700  | 4.42872600  |
| H         | 5.39339500  | 4.50976800  | -1.19560200 | H         | -0.21354300 | 1.75404900  | 4.39367800  |
| H         | 4.19187200  | 4.72405300  | 0.07967900  | N         | -0.19831200 | -1.63966600 | -2.14338800 |
| H         | 5.23183300  | 3.29894400  | 0.07923600  | N         | -0.99058400 | -1.35269600 | -1.38712500 |
| <b>31</b> |             |             |             | N         | -1.74331900 | -0.96227300 | -0.49236900 |
| N         | -0.82836100 | -2.08881500 | -0.01316100 | N         | 0.12849900  | 2.06098900  | -0.19651900 |
| N         | 0.33687900  | -1.51929400 | -0.03615700 | C         | 1.13369200  | 2.00378800  | -1.05008600 |
| N         | -1.74522700 | -1.10508000 | 0.20737700  | C         | -0.61134600 | 3.16725700  | -0.54702400 |
| C         | 0.23377900  | -0.15377700 | 0.16072600  | H         | 1.90185200  | 1.24462000  | -1.04400500 |
| C         | -1.12075500 | 0.11061700  | 0.31880300  | C         | -0.03636000 | 3.77718400  | -1.62800100 |
| Zn        | 1.78170100  | 1.08898600  | 0.19022900  | H         | -1.49937400 | 3.44746600  | -0.00231100 |
| C         | 2.49604300  | 2.93775500  | 0.39151300  | H         | -0.30819500 | 4.65541700  | -2.19158000 |
| H         | 1.67847700  | 3.65895100  | 0.26754800  | C         | 2.02026300  | 3.27779600  | -3.02361100 |
| H         | 3.17929900  | 3.13809300  | -0.44554400 | H         | 1.50847200  | 3.25814400  | -3.98739600 |
| C         | 3.22107700  | 3.22322400  | 1.72051600  | H         | 2.50344200  | 4.24761900  | -2.89164700 |
| H         | 4.06615000  | 2.54522200  | 1.88555500  | H         | 2.78427700  | 2.50179100  | -3.01782400 |
| H         | 3.62141500  | 4.24495700  | 1.77147900  | N         | 1.08017800  | 3.02366100  | -1.94165300 |
| H         | 2.55546500  | 3.10316500  | 2.58221100  | C         | -3.11520700 | -1.33311000 | -0.55419000 |
| C         | -3.12601900 | -1.44653700 | 0.29487500  | C         | -3.92799200 | -0.87564100 | 0.48713600  |
| C         | -3.72781600 | -2.13525400 | -0.75923300 | C         | -3.66173700 | -2.11073900 | -1.58143300 |
| C         | -3.86148200 | -1.12336400 | 1.43585100  | C         | -5.28130700 | -1.19597300 | 0.49569600  |
| C         | -5.07178500 | -2.48857000 | -0.67297800 | H         | -3.48827300 | -0.27922200 | 1.27757600  |
| H         | -3.13623800 | -2.39205500 | -1.62988800 | C         | -5.01853500 | -2.42411500 | -1.55985200 |
| C         | -5.20920200 | -1.46858000 | 1.50870900  | H         | -3.03683500 | -2.47297900 | -2.39176400 |
| H         | -3.37551600 | -0.62679400 | 2.26780300  | C         | -5.83444200 | -1.96979000 | -0.52515500 |
| C         | -5.81754100 | -2.15032500 | 0.45592400  | H         | -5.90628500 | -0.83939900 | 1.30793800  |
| H         | -5.53775200 | -3.02642400 | -1.49214700 | H         | -5.43659500 | -3.02872100 | -2.35831100 |
| H         | -5.77913400 | -1.21748500 | 2.39731000  | H         | -6.89026600 | -2.21824800 | -0.51310100 |
| N         | 3.49728000  | -0.23727000 | -0.14894400 | C         | 3.41418500  | -2.26614700 | 0.50376100  |
| C         | 3.41415300  | -1.55095700 | -0.29240100 | H         | 3.19967700  | -2.86491000 | -0.39129300 |
| C         | 4.83413400  | 0.08100700  | -0.25425700 | H         | 3.49660500  | -2.98596700 | 1.32866100  |
| H         | 2.48343400  | -2.10384700 | -0.26388100 | C         | 4.76802300  | -1.55261500 | 0.32199400  |
| C         | 5.55759100  | -1.05967000 | -0.46287000 | H         | 4.68766900  | -0.84179000 | -0.50941400 |
| H         | 5.18011800  | 1.09945400  | -0.17324600 | H         | 4.97685700  | -0.95312300 | 1.21519500  |
| H         | 6.61400300  | -1.23092600 | -0.59384700 | C         | 5.92527000  | -2.52142300 | 0.06242700  |
| N         | 4.63934500  | -2.09471400 | -0.48488900 | H         | 5.70303800  | -3.12421000 | -0.82737600 |



|              |             |             |             |               |             |             |             |
|--------------|-------------|-------------|-------------|---------------|-------------|-------------|-------------|
| H            | 5.99770900  | -3.23189700 | 0.89548600  | C             | -2.51787700 | -2.41587400 | -1.42870600 |
| C            | 7.27078200  | -1.81598700 | -0.12253100 | C             | -1.80419700 | -2.25655400 | 0.87762700  |
| H            | 8.07797000  | -2.53109300 | -0.30617200 | C             | -3.74935700 | -2.90703900 | -1.00567200 |
| H            | 7.24492600  | -1.12405400 | -0.97085000 | H             | -2.29470300 | -2.29654600 | -2.48131400 |
| H            | 7.54107400  | -1.23494000 | 0.76497500  | C             | -3.04631600 | -2.73363400 | 1.29099800  |
| <b>33-ts</b> |             |             |             | H             | -1.03022900 | -2.05123200 | 1.60836100  |
| N            | 0.58291700  | -1.76238400 | -0.89701600 | C             | -4.02399800 | -3.05990400 | 0.35347500  |
| N            | 1.75108000  | -1.72978100 | -0.61235300 | H             | -4.50047900 | -3.16760100 | -1.74452600 |
| N            | -0.47282800 | -1.24987000 | -0.37504200 | H             | -3.23990900 | -2.86651900 | 2.35044500  |
| C            | 1.38844700  | -0.30339200 | 1.33997100  | C             | 0.26327500  | 0.89379400  | 3.22898100  |
| C            | 2.34273600  | -0.89074100 | 0.75318100  | H             | 0.74007700  | 1.88061000  | 3.30633700  |
| Zn           | -0.52763300 | 0.04026700  | 1.63888300  | H             | -0.75634000 | 1.04154400  | 3.61095000  |
| C            | -1.67789400 | -1.49811900 | -1.08856700 | C             | 1.00833200  | -0.10632200 | 4.12857100  |
| C            | -1.71266100 | -2.13527700 | -2.34088300 | H             | 1.04106600  | 0.21759900  | 5.17707600  |
| C            | -2.88283300 | -1.06855300 | -0.51883700 | H             | 0.53852000  | -1.09566500 | 4.11884400  |
| C            | -2.92447700 | -2.33390700 | -2.99346400 | H             | 2.04535400  | -0.24987500 | 3.80856600  |
| H            | -0.78813000 | -2.47570900 | -2.79135400 | N             | -1.03224900 | 2.06449700  | 0.32801400  |
| C            | -4.09037800 | -1.27169100 | -1.18155200 | C             | -1.23265200 | 2.14643600  | -0.97587500 |
| H            | -2.87261500 | -0.58577500 | 0.45055300  | C             | -1.68399700 | 3.14283900  | 0.88463200  |
| C            | -4.12287300 | -1.90369400 | -2.42300100 | H             | -0.85183600 | 1.45127800  | -1.70859900 |
| H            | -2.93007500 | -2.83200800 | -3.95840500 | C             | -2.27995000 | 3.87463300  | -0.10468000 |
| H            | -5.01228700 | -0.93586100 | -0.71691500 | H             | -1.67930200 | 3.31614500  | 1.94921000  |
| C            | -1.95626400 | -0.19484100 | 3.00952900  | H             | -2.87395000 | 4.77408700  | -0.07922000 |
| H            | -1.68632600 | 0.43751400  | 3.86686600  | C             | -2.40021600 | 3.63385900  | -2.62630100 |
| H            | -2.90781800 | 0.21677800  | 2.64557500  | H             | -2.01210300 | 4.62634500  | -2.86073100 |
| C            | -2.17867900 | -1.63556700 | 3.50075100  | H             | -2.00667600 | 2.92295000  | -3.35127500 |
| H            | -2.95048500 | -1.70077400 | 4.27968600  | H             | -3.48888600 | 3.64446000  | -2.69931200 |
| H            | -2.48969300 | -2.30151200 | 2.68895600  | N             | -1.98386500 | 3.22788800  | -1.29037800 |
| H            | -1.26408600 | -2.06414600 | 3.92371300  | H             | -4.98764900 | -3.43850900 | 0.67786500  |
| N            | -0.87155200 | 1.92721100  | 0.55917000  | C             | 2.84643600  | 0.23818400  | -1.12779000 |
| C            | -0.26313300 | 2.31087800  | -0.54683300 | H             | 3.03378400  | 0.70330700  | -2.10290500 |
| C            | -1.79608100 | 2.90504700  | 0.84793000  | H             | 2.71015700  | 1.05975000  | -0.41414100 |
| H            | 0.52055800  | 1.76565000  | -1.04970900 | C             | 4.08074900  | -0.58790200 | -0.72461500 |
| C            | -1.73448800 | 3.88575800  | -0.10319100 | H             | 3.90065800  | -1.04720700 | 0.25541900  |
| H            | -2.43734700 | 2.83486400  | 1.71233200  | H             | 4.19402100  | -1.41654700 | -1.43233200 |
| H            | -2.28617500 | 4.80310900  | -0.23152000 | C             | 5.37091000  | 0.23602900  | -0.67967900 |
| C            | -0.33079600 | 4.20971400  | -2.18856400 | H             | 5.24919300  | 1.06716800  | 0.02721300  |
| H            | 0.03398900  | 5.20535600  | -1.93064100 | H             | 5.53955300  | 0.69837400  | -1.66067400 |
| H            | 0.47421200  | 3.65524100  | -2.66885000 | C             | 6.59921000  | -0.58934500 | -0.28882100 |
| H            | -1.16163600 | 4.29952300  | -2.89042100 | H             | 6.77017200  | -1.40593100 | -0.99733500 |
| N            | -0.74998400 | 3.49499300  | -0.99135500 | H             | 7.50551300  | 0.02316200  | -0.26630100 |
| H            | -5.06543200 | -2.06291700 | -2.93624800 | H             | 6.47924800  | -1.03704900 | 0.70300000  |
| C            | 3.81270700  | -1.13559300 | 0.77858800  | <b>3-ts-a</b> |             |             |             |
| H            | 3.98074700  | -2.20101600 | 0.58914400  | N             | 1.26238600  | -0.79400300 | 0.71726400  |
| H            | 4.18580700  | -0.92208400 | 1.78395200  | N             | 0.07285500  | -1.05937000 | 0.76295600  |
| C            | 4.58103400  | -0.30140500 | -0.25963400 | N             | 1.87687700  | 0.18587400  | 0.19209000  |
| H            | 4.15343500  | -0.48628200 | -1.25088700 | C             | -0.76115300 | 0.04714500  | -0.12058900 |
| H            | 4.42747200  | 0.76335200  | -0.04652800 | C             | -2.00469200 | 0.13992400  | -0.15555600 |
| C            | 6.08017300  | -0.61593700 | -0.27687500 | C             | -3.40187400 | 0.11962500  | -0.12794100 |
| H            | 6.22339700  | -1.68219100 | -0.49096200 | C             | -4.11380100 | 0.88216500  | 0.82918400  |
| H            | 6.50051900  | -0.45002000 | 0.72306900  | C             | -4.12845000 | -0.66196800 | -1.05839800 |
| C            | 6.85477500  | 0.21775200  | -1.30010500 | C             | -5.49960300 | 0.85360200  | 0.85299800  |
| H            | 6.76618000  | 1.28890000  | -1.09148200 | H             | -3.55994400 | 1.48197500  | 1.54210500  |
| H            | 7.91990800  | -0.03075200 | -1.29560600 | C             | -5.51445100 | -0.67445100 | -1.02716700 |
| H            | 6.48156000  | 0.04895000  | -2.31529300 | H             | -3.58581900 | -1.24884700 | -1.79044800 |
| <b>34</b>    |             |             |             | C             | -6.20330200 | 0.07956400  | -0.07353400 |
| N            | 0.22980300  | -2.01659300 | -2.10251600 | H             | -6.03752300 | 1.43652600  | 1.59297800  |
| N            | 1.36048700  | -1.40853900 | -2.26773300 | H             | -6.06374900 | -1.27580200 | -1.74368200 |
| N            | -0.28933700 | -1.57481000 | -0.91806300 | H             | -7.28790700 | 0.06358700  | -0.05199500 |
| C            | 0.52992400  | -0.65193700 | -0.30839700 | C             | 3.27361000  | 0.12302300  | 0.05740900  |
| C            | 1.58679800  | -0.57186000 | -1.20633500 | C             | 4.03994000  | -1.02305700 | 0.32606000  |
| Zn           | 0.13194800  | 0.44585000  | 1.30455900  | C             | 3.91440800  | 1.28473700  | -0.39553400 |
| C            | -1.54333100 | -2.08152400 | -0.48352300 | C             | 5.41859200  | -0.99308700 | 0.14826500  |

|               |             |             |             |             |             |             |             |
|---------------|-------------|-------------|-------------|-------------|-------------|-------------|-------------|
| H             | 3.54816000  | -1.92288600 | 0.67822500  | H           | 0.41142500  | 2.99054300  | -1.49319100 |
| C             | 5.29327000  | 1.29991800  | -0.57757100 | H           | 2.10578600  | 4.07649800  | -0.03638400 |
| H             | 3.31630500  | 2.16634000  | -0.59982200 | H           | 0.80266400  | -3.00587100 | 0.36926200  |
| C             | 6.05492900  | 0.16340500  | -0.30593800 | <b>6-a</b>  |             |             |             |
| H             | 6.00150200  | -1.88331300 | 0.36417900  | N           | 1.59873500  | -2.34738300 | 0.13117700  |
| H             | 5.77548400  | 2.20651400  | -0.92954800 | N           | 0.67598000  | -3.15950900 | 0.21569800  |
| H             | 7.13078800  | 0.17775200  | -0.44496300 | N           | 1.29275400  | -0.96252500 | 0.05922900  |
| H             | 0.07334800  | 0.62738400  | -0.55331700 | C           | 0.02102000  | -0.54341000 | 0.03478600  |
| <b>4-a</b>    |             |             |             | C           | -1.16311200 | -0.28698400 | 0.02397100  |
| N             | 1.42372900  | -1.89364100 | -0.00072500 | C           | -2.54298300 | 0.06922900  | 0.02133400  |
| N             | 0.22772800  | -2.33973100 | -0.00085900 | C           | -3.46591600 | -0.63983900 | -0.76870900 |
| N             | 1.60952700  | -0.57950500 | -0.00013900 | C           | -3.00330100 | 1.13938500  | 0.81032100  |
| C             | -0.82055100 | -1.50352800 | -0.00055100 | C           | -4.81160500 | -0.29019000 | -0.76099400 |
| C             | -1.85750700 | -0.86776500 | -0.00035500 | H           | -3.11793400 | -1.46074600 | -1.38594100 |
| C             | -3.09662700 | -0.17105500 | -0.00014900 | C           | -4.34809600 | 1.49192700  | 0.79915800  |
| C             | -3.14216100 | 1.23607500  | -0.00244700 | H           | -2.29840800 | 1.68545800  | 1.42726400  |
| C             | -4.31004400 | -0.88658900 | 0.00230400  | C           | -5.25696100 | 0.77746400  | 0.01840900  |
| C             | -4.36155800 | 1.90302700  | -0.00231700 | H           | -5.51386100 | -0.84855600 | -1.37124800 |
| H             | -2.21409300 | 1.79735900  | -0.00437300 | H           | -4.68951200 | 2.32231500  | 1.40854800  |
| C             | -5.52524600 | -0.21221500 | 0.00246700  | H           | -6.30682500 | 1.05128300  | 0.01753600  |
| H             | -4.28293000 | -1.97037700 | 0.00407400  | C           | 2.40516100  | -0.06953400 | -0.02250700 |
| C             | -5.55650300 | 1.18280400  | 0.00014200  | C           | 3.68624600  | -0.49958000 | 0.33728100  |
| H             | -4.38065900 | 2.98801300  | -0.00413300 | C           | 2.20251600  | 1.24231700  | -0.45803500 |
| H             | -6.45199200 | -0.77670000 | 0.00439100  | C           | 4.75389100  | 0.38895700  | 0.25122100  |
| H             | -6.50705300 | 1.70604100  | 0.00023700  | H           | 3.84008500  | -1.51464700 | 0.67604800  |
| C             | 2.89267800  | -0.00755400 | 0.00009900  | C           | 3.28034600  | 2.12130100  | -0.52938500 |
| C             | 4.04977300  | -0.79451700 | -0.00085500 | H           | 1.20926000  | 1.57102700  | -0.74106400 |
| C             | 2.99406800  | 1.38801200  | 0.00135900  | C           | 4.56111400  | 1.70143800  | -0.17849000 |
| C             | 5.29464700  | -0.17413900 | -0.00053800 | H           | 5.74544800  | 0.04877200  | 0.53173100  |
| H             | 3.96360400  | -1.87307400 | -0.00181200 | H           | 3.11252000  | 3.13830100  | -0.86860100 |
| C             | 4.24701400  | 1.99308000  | 0.00164000  | H           | 5.39882700  | 2.38799900  | -0.23720900 |
| H             | 2.09534600  | 1.99850700  | 0.00213500  | H           | -0.26181500 | -2.71016900 | 0.23005200  |
| C             | 5.40450300  | 1.21692500  | 0.00070200  | <b>15-a</b> |             |             |             |
| H             | 6.18928100  | -0.78832300 | -0.00128900 | C           | 1.66694100  | -0.46499000 | -0.02393900 |
| H             | 4.31504700  | 3.07596900  | 0.00262100  | C           | 0.46962500  | -0.70287200 | -0.04365500 |
| H             | 6.38061700  | 1.68957600  | 0.00093200  | C           | 3.06563900  | -0.18116400 | 0.00113500  |
| H             | 0.79103500  | 0.02779000  | 0.00027100  | C           | 3.75826400  | -0.08861900 | 1.22258400  |
| <b>5-ts-a</b> |             |             |             | C           | 3.78381500  | 0.01222800  | -1.19338100 |
| N             | 2.82761200  | -1.95252900 | -0.11115000 | C           | 5.12115700  | 0.18846900  | 1.24510300  |
| N             | 3.04438200  | -3.05203500 | 0.18398100  | H           | 3.21470900  | -0.23929300 | 2.14885100  |
| N             | 1.77193600  | -1.20557600 | -0.32439800 | C           | 5.14676700  | 0.28894800  | -1.16364300 |
| C             | 0.35116200  | -2.02887200 | 0.15597200  | H           | 3.26030900  | -0.06028900 | -2.14039400 |
| C             | -0.76899500 | -1.48584600 | 0.18525800  | C           | 5.82174500  | 0.37886600  | 0.05387300  |
| C             | -1.97137500 | -0.76476300 | 0.16665400  | H           | 5.63926900  | 0.25466300  | 2.19677400  |
| C             | -2.81196900 | -0.78649000 | -0.97257800 | H           | 5.68496300  | 0.43372100  | -2.09524300 |
| C             | -2.38271100 | -0.00736700 | 1.28961100  | H           | 6.88523500  | 0.59421700  | 0.07415800  |
| C             | -4.00400100 | -0.07599400 | -0.98257200 | Zn          | -1.39684700 | -1.14208200 | -0.04178600 |
| H             | -2.51489100 | -1.37125200 | -1.83627900 | C           | -3.07785500 | -2.15840200 | 0.01210700  |
| C             | -3.57806500 | 0.69629800  | 1.26516000  | H           | -3.65876100 | -1.80604800 | 0.87460800  |
| H             | -1.74941300 | 0.01660900  | 2.16923000  | H           | -3.66790900 | -1.87121700 | -0.86802900 |
| C             | -4.39514900 | 0.66891200  | 0.13236600  | C           | -2.94513300 | -3.68958900 | 0.07001300  |
| H             | -4.63602500 | -0.10475700 | -1.86452000 | H           | -2.39682700 | -4.01939100 | 0.95804800  |
| H             | -3.87698600 | 1.27217500  | 2.13522600  | H           | -3.92238800 | -4.18849300 | 0.09513400  |
| H             | -5.32900700 | 1.22087700  | 0.11947200  | H           | -2.40786100 | -4.08663500 | -0.79698700 |
| C             | 1.90287000  | 0.21278600  | -0.24317100 | C           | -1.38786900 | 2.19402900  | -0.38763000 |
| C             | 2.85180400  | 0.81812800  | 0.58711100  | O           | -2.20753600 | 1.01585400  | -0.17899400 |
| C             | 1.02822400  | 0.99698900  | -0.99721400 | C           | -2.14298000 | 3.32550300  | 0.30043200  |
| C             | 2.92859000  | 2.20604900  | 0.64745400  | H           | -1.29470900 | 2.36665400  | -1.46570400 |
| H             | 3.52693600  | 0.20494200  | 1.17389500  | C           | -3.56167400 | 1.40077400  | 0.16938300  |
| C             | 1.09667800  | 2.38533500  | -0.90904700 | C           | -3.60679700 | 2.92704400  | 0.05680700  |
| H             | 0.30837900  | 0.52056100  | -1.65081100 | H           | -1.89069000 | 4.30562100  | -0.10951400 |
| C             | 2.04786700  | 2.99467600  | -0.09313800 | H           | -1.91857400 | 3.33846500  | 1.37139000  |
| H             | 3.67403500  | 2.67160600  | 1.28387400  | H           | -4.24998300 | 0.89049800  | -0.50663200 |

|             |             |             |             |
|-------------|-------------|-------------|-------------|
| H           | -3.75795300 | 1.05830100  | 1.18961700  |
| H           | -3.92085000 | 3.22903800  | -0.94684100 |
| H           | -4.30150900 | 3.37292100  | 0.77149600  |
| H           | -0.40063300 | 1.98152900  | 0.01966000  |
| <b>22-a</b> |             |             |             |
| C           | -1.99683300 | 0.02634800  | 0.46983800  |
| C           | -0.78130200 | 0.00419500  | 0.59440100  |
| C           | -3.41664500 | 0.05042500  | 0.32039600  |
| C           | -4.15802200 | -1.14542300 | 0.27585600  |
| C           | -4.11264300 | 1.26933200  | 0.21426400  |
| C           | -5.54102700 | -1.12017600 | 0.12829000  |
| H           | -3.63486000 | -2.09151000 | 0.36296100  |
| C           | -5.49578400 | 1.28855600  | 0.06701200  |
| H           | -3.55475100 | 2.19866800  | 0.25330200  |
| C           | -6.21720700 | 0.09540400  | 0.02239500  |
| H           | -6.09421900 | -2.05389000 | 0.09794900  |
| H           | -6.01365200 | 2.23956600  | -0.01158200 |
| H           | -7.29637600 | 0.11280300  | -0.09135900 |
| Zn          | 1.13789400  | -0.05630300 | 0.89592000  |
| C           | 2.75547100  | -0.27100600 | 2.01984900  |
| H           | 3.64391000  | -0.29325800 | 1.37428000  |
| H           | 2.86450000  | 0.64129800  | 2.62177000  |
| C           | 2.77025000  | -1.48969400 | 2.95964900  |
| H           | 2.69727200  | -2.43630100 | 2.41181500  |
| H           | 3.68538700  | -1.54508200 | 3.56444100  |
| H           | 1.92857900  | -1.47180700 | 3.65946300  |
| C           | 0.61556000  | -1.97841000 | -1.86220000 |
| O           | 1.63623600  | -1.45852000 | -0.99421500 |
| C           | 0.60577100  | -3.48920500 | -1.59785100 |
| H           | 0.88693400  | -1.75299300 | -2.90258500 |
| C           | 2.71588300  | -2.40377600 | -1.03585900 |
| C           | 2.05537900  | -3.79360800 | -1.13179300 |
| H           | 0.32063900  | -4.05602700 | -2.48675800 |
| H           | -0.11099200 | -3.72767400 | -0.80965500 |

|            |             |             |             |
|------------|-------------|-------------|-------------|
| H          | 3.33539400  | -2.19418700 | -1.91753200 |
| H          | 3.31842000  | -2.25294100 | -0.14157600 |
| H          | 2.59095100  | -4.43587000 | -1.83431100 |
| H          | 2.05741300  | -4.29717900 | -0.16338900 |
| H          | -0.31233800 | -1.46849500 | -1.61041100 |
| C          | 0.81317600  | 2.51759600  | -1.26204800 |
| O          | 1.67256700  | 1.84874300  | -0.32605100 |
| C          | 2.93993700  | 2.52249300  | -0.37483000 |
| C          | 2.61555300  | 4.01009100  | -0.62959400 |
| C          | 1.12792800  | 4.00406900  | -1.07224300 |
| H          | 1.05650200  | 2.17860300  | -2.27834400 |
| H          | -0.20879300 | 2.22723800  | -1.02555800 |
| H          | 3.44827200  | 2.32859200  | 0.56852900  |
| H          | 3.53805700  | 2.09663600  | -1.19002800 |
| H          | 2.75477500  | 4.60777900  | 0.27292400  |
| H          | 3.27045400  | 4.42551200  | -1.39860400 |
| H          | 0.49203900  | 4.42459100  | -0.29025200 |
| H          | 0.95656300  | 4.57996500  | -1.98415300 |
| <b>THF</b> |             |             |             |
| C          | -1.17256000 | 0.41804900  | 0.08848000  |
| O          | -0.03891600 | 1.21114700  | -0.26552300 |
| C          | 1.10693600  | 0.50693700  | 0.20117800  |
| C          | 0.82382700  | -0.96336000 | -0.12679600 |
| C          | -0.71453900 | -1.06115900 | 0.02928800  |
| H          | -1.50730200 | 0.68582400  | 1.10026700  |
| H          | -1.97178300 | 0.66191600  | -0.61287000 |
| H          | 1.98023500  | 0.92137400  | -0.30435000 |
| H          | 1.22695000  | 0.65583600  | 1.28581800  |
| H          | 1.12148900  | -1.17799400 | -1.15602000 |
| H          | 1.36319300  | -1.65232300 | 0.52736800  |
| H          | -1.16763100 | -1.59278700 | -0.80971600 |
| H          | -0.99581900 | -1.59382200 | 0.94079300  |

**7. The data of distortion, interaction and total energies of the transition states by B3LYP-D3BJ method in THF solvent**

|              | $\Delta E_{dis}(\text{azide})$ | $\Delta E_{dis}(\text{alkyne})$ | $\Delta E_{dist}$ | $\Delta E_{int}$ | $\Delta E^\ddagger$ |
|--------------|--------------------------------|---------------------------------|-------------------|------------------|---------------------|
| <b>9-ts</b>  | 29.9                           | -14.6                           | 15.3              | 26.6             | 29.9                |
| <b>12-ts</b> | 40.9                           | -23.9                           | 17.0              | 30.6             | 40.9                |
| <b>17-ts</b> | 28.0                           | -14.6                           | 13.4              | 26.5             | 28.0                |
| <b>20-ts</b> | 39.6                           | -24.9                           | 14.7              | 29.6             | 39.6                |
| <b>23-ts</b> | 25.7                           | -14.7                           | 11.0              | 28.7             | 25.7                |
| <b>25-ts</b> | 29.6                           | -17.0                           | 12.6              | 29.9             | 29.6                |

**8. The data of distortion, interaction and total energies along the reaction pathways of the dipolar cycloadditions by B3LYP-D3BJ method in THF solvent.**

**8.1 The data of distortion, interaction and total energies along the reaction pathways of the the dipolar cycloadditions for the formation of 1,5-disubstituted product by B3LYP-D3BJ method in THF solvent.**

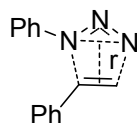

| Step | r    | $\square E^\ddagger$ | $\square E^\ddagger_{dist}$ | $\square E^\ddagger_{int}$ |
|------|------|----------------------|-----------------------------|----------------------------|
| 1    | 3.20 | -1.72                | 2.35                        | -4.07                      |
| 2    | 3.06 | -0.82                | 2.87                        | -3.68                      |
| 3    | 2.90 | 0.65                 | 3.65                        | -3.00                      |
| 4    | 2.74 | 3.10                 | 5.14                        | -2.03                      |

|    |      |       |       |        |
|----|------|-------|-------|--------|
| 5  | 2.63 | 5.27  | 6.72  | -1.45  |
| 6  | 2.55 | 7.08  | 8.40  | -1.31  |
| 7  | 2.47 | 9.06  | 10.89 | -1.83  |
| 8  | 2.38 | 10.98 | 14.37 | -3.39  |
| 9  | 2.25 | 13.05 | 21.63 | -8.58  |
| 10 | 2.17 | 13.35 | 27.95 | -14.60 |
| 11 | 2.14 | 13.00 | 29.75 | -16.75 |
| 12 | 2.07 | 11.81 | 35.65 | -23.84 |
| 13 | 1.98 | 8.61  | 44.68 | -36.06 |
| 14 | 1.89 | 4.32  | 54.81 | -50.50 |
| 15 | 1.76 | -0.76 | 68.66 | -69.43 |
| 16 | 1.69 | -3.95 | 76.77 | -80.72 |
| 17 | 1.61 | -7.89 | 86.15 | -94.03 |

**8.2 The data of distortion, interaction and total energies along the reaction pathways of the the dipolar cycloaddition for the formation of 1,4-disubstituted product by B3LYP-D3BJ method in THF solvent.**

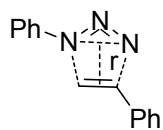

| Step | r    | $\Delta E^\ddagger$ | $\Delta E^\ddagger_{dist}$ | $\Delta E^\ddagger_{int}$ |
|------|------|---------------------|----------------------------|---------------------------|
| 1    | 3.21 | -6.81               | 1.08                       | -7.89                     |
| 2    | 3.10 | -6.31               | 1.42                       | -7.73                     |
| 3    | 2.97 | -5.18               | 2.18                       | -7.36                     |

|    |      |       |       |        |
|----|------|-------|-------|--------|
| 4  | 2.85 | -3.31 | 3.35  | -6.66  |
| 5  | 2.73 | -0.41 | 5.37  | -5.77  |
| 6  | 2.61 | 3.27  | 8.53  | -5.26  |
| 7  | 2.55 | 5.23  | 10.60 | -5.37  |
| 8  | 2.46 | 8.39  | 14.72 | -6.33  |
| 9  | 2.37 | 11.48 | 20.32 | -8.83  |
| 10 | 2.31 | 13.33 | 25.10 | -11.77 |
| 11 | 2.23 | 14.63 | 32.58 | -17.95 |
| 12 | 2.16 | 14.70 | 39.58 | -24.88 |
| 13 | 2.11 | 14.38 | 44.88 | -30.50 |
| 14 | 2.07 | 13.93 | 49.10 | -35.17 |
| 15 | 2.03 | 13.44 | 51.63 | -38.19 |
| 16 | 1.96 | 11.78 | 56.95 | -45.17 |
| 17 | 1.85 | 8.79  | 63.84 | -55.05 |
| 18 | 1.78 | 5.31  | 70.48 | -65.16 |
| 19 | 1.64 | -1.25 | 82.57 | -83.82 |

---

**9. B3LYP-D3BJ geometries for all the optimized distortion – interaction analysis compounds in THF solvent.**

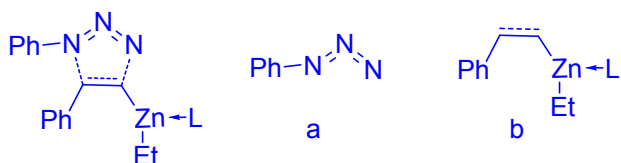

The distortion-interaction analysis was used to shed light on the regioselectivity for the cycloaddition of ethyl(phenylethynyl)zinc and azidobenzene with one imidazole ligand. Intrinsic reaction coordinate (IRC) calculations of transition state **17-ts** and **20-ts** were performed, and every geometry on the reaction coordinate is separated to azidobenzene part (a) and ethyl(phenylethynyl)zinc part (b), which is shown in the figure above. The data in section 9.1 and 9.2 of SI represent the structural information of every point in distortion-interaction curves (Figure 8). 9.1 corresponds to transition state 17-ts, and 9.2 corresponds to transition state 20-ts. Moreover, the label “a” stands for the geometry of azidobenzene part, and “b” stands for the geometry of ethyl(phenylethynyl)zinc part.

**9.1 B3LYP-D3BJ geometries for 17-ts**

|          |             |             |             |           |             |             |             |
|----------|-------------|-------------|-------------|-----------|-------------|-------------|-------------|
| <b>1</b> |             |             |             | C         | -4.71258900 | -3.48254200 | -1.21559200 |
| N        | -0.97742800 | -1.58143300 | -0.99277600 | H         | -2.60597700 | -3.46474100 | -1.65611800 |
| N        | 0.03676100  | -1.97357900 | -1.31799800 | C         | -5.57884000 | -1.53859800 | -0.08272100 |
| N        | -1.98286900 | -1.01263600 | -0.58512800 | H         | -4.13275000 | 0.00650300  | 0.36468600  |
| C        | 0.71273600  | 1.06342700  | -0.06926600 | C         | -5.78716600 | -2.79540300 | -0.65304200 |
| C        | -0.35091200 | 1.50185800  | 0.34302300  | H         | -4.86549900 | -4.45892600 | -1.66429100 |
| Zn       | 2.55750300  | 1.07694100  | -0.65466000 | H         | -6.40984800 | -0.99607100 | 0.35615400  |
| C        | 3.87694700  | 2.22953200  | -1.58303200 | N         | 3.53540300  | -0.62811500 | 0.29077000  |
| H        | 4.47658400  | 1.63483100  | -2.28413300 | C         | 2.96737100  | -1.75019800 | 0.69418200  |
| H        | 4.59152700  | 2.59606400  | -0.83234600 | C         | 4.87161300  | -0.73614500 | 0.60629200  |
| C        | 3.24885600  | 3.42758400  | -2.31685600 | H         | 1.92152500  | -1.99232300 | 0.58512900  |
| H        | 2.65596200  | 4.05329700  | -1.64208600 | C         | 5.10002800  | -1.94121100 | 1.20922400  |
| H        | 4.00133900  | 4.08011900  | -2.78019200 | H         | 5.56901600  | 0.05418700  | 0.37751600  |
| H        | 2.57333200  | 3.10440100  | -3.11572000 | H         | 5.99674500  | -2.39466400 | 1.59988800  |
| C        | -1.54235500 | 2.10798900  | 0.83718600  | N         | 3.87591900  | -2.58292500 | 1.25706000  |
| C        | -1.89917400 | 1.99675500  | 2.19343200  | C         | 3.61820100  | -3.91005900 | 1.79841400  |
| C        | -2.34919800 | 2.89593000  | -0.00496600 | H         | 4.21036600  | -4.65833000 | 1.26902700  |
| C        | -3.00645400 | 2.67381700  | 2.69414900  | H         | 3.86114800  | -3.94293700 | 2.86186000  |
| H        | -1.28463400 | 1.39034300  | 2.84987100  | H         | 2.56256100  | -4.14548100 | 1.67178700  |
| C        | -3.45611300 | 3.56954300  | 0.50082500  | H         | -6.77898100 | -3.23470000 | -0.66077600 |
| H        | -2.08348900 | 2.98596500  | -1.05236500 | <b>1a</b> |             |             |             |
| C        | -3.78602500 | 3.46874400  | 1.85313600  | N         | -0.97742800 | -1.58143300 | -0.99277600 |
| H        | -3.25804800 | 2.58754300  | 3.74688100  | N         | 0.03676100  | -1.97357900 | -1.31799800 |
| H        | -4.05916000 | 4.18366200  | -0.16102200 | N         | -1.98286900 | -1.01263600 | -0.58512800 |
| H        | -4.64284600 | 4.00544700  | 2.24809300  | C         | -3.23689200 | -1.66546300 | -0.63646300 |
| C        | -3.23689200 | -1.66546300 | -0.63646300 | C         | -3.43654800 | -2.92546900 | -1.21110000 |
| C        | -3.43654800 | -2.92546900 | -1.21110000 | C         | -4.31084300 | -0.96949800 | -0.07218900 |
| C        | -4.31084300 | -0.96949800 | -0.07218900 | C         | -4.71258900 | -3.48254200 | -1.21559200 |

|           |             |             |             |           |             |             |             |
|-----------|-------------|-------------|-------------|-----------|-------------|-------------|-------------|
| H         | -2.60597700 | -3.46474100 | -1.65611800 | H         | 2.54008600  | 4.02478900  | -1.65072500 |
| C         | -5.57884000 | -1.53859800 | -0.08272100 | H         | 3.93673200  | 4.11691300  | -2.72175000 |
| H         | -4.13275000 | 0.00650300  | 0.36468600  | H         | 2.57313100  | 3.07784300  | -3.12769100 |
| C         | -5.78716600 | -2.79540300 | -0.65304200 | C         | -1.56103900 | 2.05773900  | 0.80390100  |
| H         | -4.86549900 | -4.45892600 | -1.66429100 | C         | -1.89642500 | 1.95974100  | 2.16620700  |
| H         | -6.40984800 | -0.99607100 | 0.35615400  | C         | -2.35647300 | 2.86766200  | -0.02742600 |
| H         | -6.77898100 | -3.23470000 | -0.66077600 | C         | -2.96461900 | 2.68254800  | 2.68650500  |
| <b>1b</b> |             |             |             | H         | -1.29098100 | 1.33335200  | 2.81219800  |
| C         | 0.71273600  | 1.06342700  | -0.06926600 | C         | -3.42434600 | 3.58705600  | 0.49821700  |
| C         | -0.35091200 | 1.50185800  | 0.34302300  | H         | -2.10740900 | 2.94427200  | -1.07996600 |
| Zn        | 2.55750300  | 1.07694100  | -0.65466000 | C         | -3.72646900 | 3.50771500  | 1.85844200  |
| C         | 3.87694700  | 2.22953200  | -1.58303200 | H         | -3.19787100 | 2.61056900  | 3.74450200  |
| H         | 4.47658400  | 1.63483100  | -2.28413300 | H         | -4.01664800 | 4.22208600  | -0.15347800 |
| H         | 4.59152700  | 2.59606400  | -0.83234600 | H         | -4.55008000 | 4.08287800  | 2.26938700  |
| C         | 3.24885600  | 3.42758400  | -2.31685600 | C         | -3.21569600 | -1.64921700 | -0.62485100 |
| H         | 2.65596200  | 4.05329700  | -1.64208600 | C         | -3.41315500 | -2.90651300 | -1.20580600 |
| H         | 4.00133900  | 4.08011900  | -2.78019200 | C         | -4.29144100 | -0.95620800 | -0.05973600 |
| H         | 2.57333200  | 3.10440100  | -3.11572000 | C         | -4.68919700 | -3.46347500 | -1.21616100 |
| C         | -1.54235500 | 2.10798900  | 0.83718600  | H         | -2.58075600 | -3.44295700 | -1.65086100 |
| C         | -1.89917400 | 1.99675500  | 2.19343200  | C         | -5.55918700 | -1.52502400 | -0.07639000 |
| C         | -2.34919800 | 2.89593000  | -0.00496600 | H         | -4.11455600 | 0.01786200  | 0.38178900  |
| C         | -3.00645400 | 2.67381700  | 2.69414900  | C         | -5.76548300 | -2.77912600 | -0.65337500 |
| H         | -1.28463400 | 1.39034300  | 2.84987100  | H         | -4.84096000 | -4.43779700 | -1.66971400 |
| C         | -3.45611300 | 3.56954300  | 0.50082500  | H         | -6.39155300 | -0.98465200 | 0.36258600  |
| H         | -2.08348900 | 2.98596500  | -1.05236500 | N         | 3.51955100  | -0.62900200 | 0.30147700  |
| C         | -3.78602500 | 3.46874400  | 1.85313600  | C         | 2.96241600  | -1.75883200 | 0.69829500  |
| H         | -3.25804800 | 2.58754300  | 3.74688100  | C         | 4.85561300  | -0.72310000 | 0.62122700  |
| H         | -4.05916000 | 4.18366200  | -0.16102200 | H         | 1.91991000  | -2.01179500 | 0.58288700  |
| H         | -4.64284600 | 4.00544700  | 2.24809300  | C         | 5.09544500  | -1.92817500 | 1.21955200  |
| N         | 3.53540300  | -0.62811500 | 0.29077000  | H         | 5.54467000  | 0.07614000  | 0.39818300  |
| C         | 2.96737100  | -1.75019800 | 0.69418200  | H         | 5.99584900  | -2.37339600 | 1.61118500  |
| C         | 4.87161300  | -0.73614500 | 0.60629200  | N         | 3.87831100  | -2.58363300 | 1.26066500  |
| H         | 1.92152500  | -1.99232300 | 0.58512900  | C         | 3.63433600  | -3.91718000 | 1.79238500  |
| C         | 5.10002800  | -1.94121100 | 1.20922400  | H         | 4.23557800  | -4.65519300 | 1.25881600  |
| H         | 5.56901600  | 0.05418700  | 0.37751600  | H         | 3.87590700  | -3.95490200 | 2.85597800  |
| H         | 5.99674500  | -2.39466400 | 1.59988800  | H         | 2.58156300  | -4.16336300 | 1.66236400  |
| N         | 3.87591900  | -2.58292500 | 1.25706000  | H         | -6.75714900 | -3.21863200 | -0.66608200 |
| C         | 3.61820100  | -3.91005900 | 1.79841400  | <b>2a</b> |             |             |             |
| H         | 4.21036600  | -4.65833000 | 1.26902700  | N         | -0.95350000 | -1.54360600 | -0.98348300 |
| H         | 3.86114800  | -3.94293700 | 2.86186000  | N         | 0.07425400  | -1.90100000 | -1.31076700 |
| H         | 2.56256100  | -4.14548100 | 1.67178700  | N         | -1.96487100 | -0.99489900 | -0.56558300 |
| <b>2</b>  |             |             |             | C         | -3.21569600 | -1.64921700 | -0.62485100 |
| N         | -0.95350000 | -1.54360600 | -0.98348300 | C         | -3.41315500 | -2.90651300 | -1.20580600 |
| N         | 0.07425400  | -1.90100000 | -1.31076700 | C         | -4.29144100 | -0.95620800 | -0.05973600 |
| N         | -1.96487100 | -0.99489900 | -0.56558300 | C         | -4.68919700 | -3.46347500 | -1.21616100 |
| C         | 0.67887800  | 0.99773400  | -0.11321800 | H         | -2.58075600 | -3.44295700 | -1.65086100 |
| C         | -0.38566800 | 1.43263500  | 0.29881100  | C         | -5.55918700 | -1.52502400 | -0.07639000 |
| Zn        | 2.52970700  | 1.05481100  | -0.65929300 | H         | -4.11455600 | 0.01786200  | 0.38178900  |
| C         | 3.83905400  | 2.25856800  | -1.53405700 | C         | -5.76548300 | -2.77912600 | -0.65337500 |
| H         | 4.49613700  | 1.69222600  | -2.20660300 | H         | -4.84096000 | -4.43779700 | -1.66971400 |
| H         | 4.50116400  | 2.65516200  | -0.75101100 | H         | -6.39155300 | -0.98465200 | 0.36258600  |
| C         | 3.19328400  | 3.42910700  | -2.29637100 | H         | -6.75714900 | -3.21863200 | -0.66608200 |
| <b>2b</b> |             |             |             | C         | -1.56103900 | 2.05773900  | 0.80390100  |
| C         | 0.67887800  | 0.99773400  | -0.11321800 | C         | -1.89642500 | 1.95974100  | 2.16620700  |
| C         | -0.38566800 | 1.43263500  | 0.29881100  | C         | -2.35647300 | 2.86766200  | -0.02742600 |
| Zn        | 2.52970700  | 1.05481100  | -0.65929300 | C         | -2.96461900 | 2.68254800  | 2.68650500  |
| C         | 3.83905400  | 2.25856800  | -1.53405700 | H         | -1.29098100 | 1.33335200  | 2.81219800  |
| H         | 4.49613700  | 1.69222600  | -2.20660300 | C         | -3.42434600 | 3.58705600  | 0.49821700  |
| H         | 4.50116400  | 2.65516200  | -0.75101100 | H         | -2.10740900 | 2.94427200  | -1.07996600 |
| C         | 3.19328400  | 3.42910700  | -2.29637100 | C         | -3.72646900 | 3.50771500  | 1.85844200  |
| H         | 2.54008600  | 4.02478900  | -1.65072500 | H         | -3.19787100 | 2.61056900  | 3.74450200  |
| H         | 3.93673200  | 4.11691300  | -2.72175000 | H         | -4.01664800 | 4.22208600  | -0.15347800 |
| H         | 2.57313100  | 3.07784300  | -3.12769100 | H         | -4.55008000 | 4.08287800  | 2.26938700  |



|   |            |             |            |
|---|------------|-------------|------------|
| N | 3.51955100 | -0.62900200 | 0.30147700 |
| C | 2.96241600 | -1.75883200 | 0.69829500 |
| C | 4.85561300 | -0.72310000 | 0.62122700 |
| H | 1.91991000 | -2.01179500 | 0.58288700 |
| C | 5.09544500 | -1.92817500 | 1.21955200 |
| H | 5.54467000 | 0.07614000  | 0.39818300 |
| H | 5.99584900 | -2.37339600 | 1.61118500 |
| N | 3.87831100 | -2.58363300 | 1.26066500 |
| C | 3.63433600 | -3.91718000 | 1.79238500 |
| H | 4.23557800 | -4.65519300 | 1.25881600 |
| H | 3.87590700 | -3.95490200 | 2.85597800 |
| H | 2.58156300 | -4.16336300 | 1.66236400 |

**3**

|    |             |             |             |
|----|-------------|-------------|-------------|
| N  | -0.92711800 | -1.50364600 | -0.97094600 |
| N  | 0.12315900  | -1.79898100 | -1.28424300 |
| N  | -1.95136300 | -0.97964400 | -0.55027100 |
| C  | 0.64951600  | 0.93509900  | -0.14937000 |
| C  | -0.41989900 | 1.35920100  | 0.25833400  |
| Zn | 2.49912000  | 1.03910400  | -0.66024000 |
| C  | 3.80323800  | 2.27495800  | -1.49401300 |
| H  | 4.49876100  | 1.72496000  | -2.14118900 |
| H  | 4.42635400  | 2.68972100  | -0.68858500 |
| C  | 3.15660900  | 3.42767600  | -2.28203000 |
| H  | 2.47029900  | 4.01137600  | -1.66023100 |
| H  | 3.89806900  | 4.13006800  | -2.68658400 |
| H  | 2.57131200  | 3.05965400  | -3.13119100 |
| C  | -1.57959000 | 2.00130900  | 0.77171600  |
| C  | -1.89286700 | 1.91663300  | 2.13937000  |
| C  | -2.36147500 | 2.83124800  | -0.05135500 |
| C  | -2.92035100 | 2.68364400  | 2.67642800  |
| H  | -1.29690200 | 1.27181300  | 2.77589700  |
| C  | -3.38870100 | 3.59479300  | 0.49145700  |
| H  | -2.12812800 | 2.89369900  | -1.10840400 |
| C  | -3.66281200 | 3.53643100  | 1.85871500  |
| H  | -3.13547100 | 2.62689500  | 3.73920300  |
| H  | -3.96916000 | 4.24968700  | -0.15117600 |
| H  | -4.45219800 | 4.14851000  | 2.28338800  |
| C  | -3.19780800 | -1.63543800 | -0.61633600 |
| C  | -3.39486300 | -2.89101700 | -1.20082000 |
| C  | -4.27449700 | -0.94304600 | -0.05105600 |
| C  | -4.67161000 | -3.44642300 | -1.21419400 |
| H  | -2.56140100 | -3.42614100 | -1.64551400 |
| C  | -5.54249800 | -1.51009500 | -0.07107800 |
| H  | -4.09736600 | 0.02973900  | 0.39292200  |
| C  | -5.74843400 | -2.76266300 | -0.65149900 |
| H  | -4.82379800 | -4.41958600 | -1.67018800 |
| H  | -6.37520000 | -0.97005300 | 0.36769100  |
| N  | 3.50277000  | -0.62674500 | 0.31191700  |
| C  | 2.95478100  | -1.76253500 | 0.70405700  |
| C  | 4.83964800  | -0.71155500 | 0.62988200  |
| H  | 1.91440800  | -2.02272100 | 0.58709500  |
| C  | 5.08969200  | -1.91763300 | 1.22194000  |
| H  | 5.52202100  | 0.09423500  | 0.40982100  |
| H  | 5.99402400  | -2.35777800 | 1.61027000  |
| N  | 3.87766000  | -2.58275100 | 1.26134800  |
| C  | 3.64427300  | -3.92082400 | 1.78609300  |
| H  | 4.25275700  | -4.65102400 | 1.24999000  |
| H  | 3.88418700  | -3.96198100 | 2.84995500  |
| H  | 2.59388300  | -4.17540800 | 1.65286600  |
| H  | -6.74030200 | -3.20165700 | -0.66705300 |

**3a**

|   |             |             |             |
|---|-------------|-------------|-------------|
| N | -0.92711800 | -1.50364600 | -0.97094600 |
| N | 0.12315900  | -1.79898100 | -1.28424300 |

|   |             |             |             |
|---|-------------|-------------|-------------|
| N | -1.95136300 | -0.97964400 | -0.55027100 |
| C | -3.19780800 | -1.63543800 | -0.61633600 |
| C | -3.39486300 | -2.89101700 | -1.20082000 |
| C | -4.27449700 | -0.94304600 | -0.05105600 |
| C | -4.67161000 | -3.44642300 | -1.21419400 |
| H | -2.56140100 | -3.42614100 | -1.64551400 |
| C | -5.54249800 | -1.51009500 | -0.07107800 |
| H | -4.09736600 | 0.02973900  | 0.39292200  |
| C | -5.74843400 | -2.76266300 | -0.65149900 |
| H | -4.82379800 | -4.41958600 | -1.67018800 |
| H | -6.37520000 | -0.97005300 | 0.36769100  |
| H | -6.74030200 | -3.20165700 | -0.66705300 |

**3b**

|    |             |             |             |
|----|-------------|-------------|-------------|
| C  | 0.64951600  | 0.93509900  | -0.14937000 |
| C  | -0.41989900 | 1.35920100  | 0.25833400  |
| Zn | 2.49912000  | 1.03910400  | -0.66024000 |
| C  | 3.80323800  | 2.27495800  | -1.49401300 |
| H  | 4.49876100  | 1.72496000  | -2.14118900 |
| H  | 4.42635400  | 2.68972100  | -0.68858500 |
| C  | 3.15660900  | 3.42767600  | -2.28203000 |
| H  | 2.47029900  | 4.01137600  | -1.66023100 |
| H  | 3.89806900  | 4.13006800  | -2.68658400 |
| H  | 2.57131200  | 3.05965400  | -3.13119100 |
| C  | -1.57959000 | 2.00130900  | 0.77171600  |
| C  | -1.89286700 | 1.91663300  | 2.13937000  |
| C  | -2.36147500 | 2.83124800  | -0.05135500 |
| C  | -2.92035100 | 2.68364400  | 2.67642800  |
| H  | -1.29690200 | 1.27181300  | 2.77589700  |
| C  | -3.38870100 | 3.59479300  | 0.49145700  |
| H  | -2.12812800 | 2.89369900  | -1.10840400 |
| C  | -3.66281200 | 3.53643100  | 1.85871500  |
| H  | -3.13547100 | 2.62689500  | 3.73920300  |
| H  | -3.96916000 | 4.24968700  | -0.15117600 |
| H  | -4.45219800 | 4.14851000  | 2.28338800  |
| N  | 3.50277000  | -0.62674500 | 0.31191700  |
| C  | 2.95478100  | -1.76253500 | 0.70405700  |
| C  | 4.83964800  | -0.71155500 | 0.62988200  |
| H  | 1.91440800  | -2.02272100 | 0.58709500  |
| C  | 5.08969200  | -1.91763300 | 1.22194000  |
| H  | 5.52202100  | 0.09423500  | 0.40982100  |
| H  | 5.99402400  | -2.35777800 | 1.61027000  |
| N  | 3.87766000  | -2.58275100 | 1.26134800  |
| C  | 3.64427300  | -3.92082400 | 1.78609300  |
| H  | 4.25275700  | -4.65102400 | 1.24999000  |
| H  | 3.88418700  | -3.96198100 | 2.84995500  |
| H  | 2.59388300  | -4.17540800 | 1.65286600  |

**4**

|    |             |             |             |
|----|-------------|-------------|-------------|
| N  | -0.90349500 | -1.46744700 | -0.95773300 |
| N  | 0.18057500  | -1.66937100 | -1.23966800 |
| N  | -1.94165100 | -0.96846700 | -0.53979500 |
| C  | 0.62131700  | 0.86897000  | -0.18313400 |
| C  | -0.45255900 | 1.28338200  | 0.22065500  |
| Zn | 2.46658500  | 1.02833400  | -0.65709900 |
| C  | 3.76873400  | 2.28212300  | -1.46363500 |
| H  | 4.48419100  | 1.73459500  | -2.09115500 |
| H  | 4.36958900  | 2.70539300  | -0.64582000 |
| C  | 3.13527800  | 3.42653500  | -2.27375900 |
| H  | 2.43878300  | 4.01643600  | -1.66931100 |
| H  | 3.88388900  | 4.12480700  | -2.67217400 |
| H  | 2.56452900  | 3.05056600  | -3.12931200 |
| C  | -1.59109300 | 1.94976600  | 0.74332600  |
| C  | -1.88220200 | 1.87876300  | 2.11567700  |
| C  | -2.35779600 | 2.79816300  | -0.07349400 |

|           |             |             |             |          |             |             |             |
|-----------|-------------|-------------|-------------|----------|-------------|-------------|-------------|
| C         | -2.87730500 | 2.67817800  | 2.66449300  | H        | -2.13667500 | 2.84924700  | -1.13376700 |
| H         | -1.29357100 | 1.22003300  | 2.74467900  | C        | -3.60683600 | 3.54810300  | 1.85316700  |
| C         | -3.35253000 | 3.59409600  | 0.48158400  | H        | -3.07747000 | 2.63369300  | 3.73071900  |
| H         | -2.13667500 | 2.84924700  | -1.13376700 | H        | -3.92294900 | 4.26434900  | -0.15409200 |
| C         | -3.60683600 | 3.54810300  | 1.85316700  | H        | -4.37153300 | 4.18451200  | 2.28692000  |
| H         | -3.07747000 | 2.63369300  | 3.73071900  | N        | 3.48837200  | -0.62401400 | 0.31872000  |
| H         | -3.92294900 | 4.26434900  | -0.15409200 | C        | 2.94743900  | -1.76434600 | 0.70708700  |
| H         | -4.37153300 | 4.18451200  | 2.28692000  | C        | 4.82600600  | -0.70234200 | 0.63445100  |
| C         | -3.18388900 | -1.62399800 | -0.61054900 | H        | 1.90849500  | -2.02916000 | 0.58968200  |
| C         | -3.38188700 | -2.87835900 | -1.19680300 | C        | 5.08388600  | -1.90948100 | 1.22105800  |
| C         | -4.26083300 | -0.93076900 | -0.04519800 | H        | 5.50344100  | 0.10821700  | 0.41665900  |
| C         | -4.65922500 | -3.43198000 | -1.21098500 | H        | 5.99130800  | -2.34615200 | 1.60606100  |
| H         | -2.54769800 | -3.41256400 | -1.64120700 | N        | 3.87557500  | -2.58155100 | 1.25957800  |
| C         | -5.52927100 | -1.49590100 | -0.06645900 | C        | 3.64878400  | -3.92195200 | 1.78092600  |
| H         | -4.08303200 | 0.04129200  | 0.39994200  | H        | 4.26216500  | -4.64771300 | 1.24435600  |
| C         | -5.73576200 | -2.74783800 | -0.64800500 | H        | 3.88693900  | -3.96436800 | 2.84515400  |
| H         | -4.81244900 | -4.40454600 | -1.66789700 | H        | 2.60002600  | -4.18196400 | 1.64522300  |
| H         | -6.36169600 | -0.95534600 | 0.37223400  | <b>5</b> |             |             |             |
| N         | 3.48837200  | -0.62401400 | 0.31872000  | N        | -0.89253200 | -1.45890900 | -0.95419400 |
| C         | 2.94743900  | -1.76434600 | 0.70708700  | N        | 0.21264800  | -1.57807300 | -1.20412800 |
| C         | 4.82600600  | -0.70234200 | 0.63445100  | N        | -1.93672900 | -0.96374300 | -0.53608200 |
| H         | 1.90849500  | -2.02916000 | 0.58968200  | C        | 0.60252300  | 0.82323700  | -0.20559900 |
| C         | 5.08388600  | -1.90948100 | 1.22105800  | C        | -0.47304900 | 1.23494600  | 0.19853500  |
| H         | 5.50344100  | 0.10821700  | 0.41665900  | Zn       | 2.44876500  | 1.02349800  | -0.65390800 |
| H         | 5.99130800  | -2.34615200 | 1.60606100  | C        | 3.75013000  | 2.28416400  | -1.45056800 |
| N         | 3.87557500  | -2.58155100 | 1.25957800  | H        | 4.47036300  | 1.73291600  | -2.06961300 |
| C         | 3.64878400  | -3.92195200 | 1.78092600  | H        | 4.34487500  | 2.70917600  | -0.62925600 |
| H         | 4.26216500  | -4.64771300 | 1.24435600  | C        | 3.12796200  | 3.42690100  | -2.27148700 |
| H         | 3.88693900  | -3.96436800 | 2.84515400  | H        | 2.43148100  | 4.02477100  | -1.67487700 |
| H         | 2.60002600  | -4.18196400 | 1.64522300  | H        | 3.88340800  | 4.11808200  | -2.66929800 |
| H         | -6.72789200 | -3.18614300 | -0.66445500 | H        | 2.56032500  | 3.04922500  | -3.12832500 |
| <b>4a</b> |             |             |             | C        | -1.59331100 | 1.92473100  | 0.72939100  |
| N         | -0.90349500 | -1.46744700 | -0.95773300 | C        | -1.87251700 | 1.86267400  | 2.10428200  |
| N         | 0.18057500  | -1.66937100 | -1.23966800 | C        | -2.35110800 | 2.78388900  | -0.08380200 |
| N         | -1.94165100 | -0.96846700 | -0.53979500 | C        | -2.85529800 | 2.67389700  | 2.65757300  |
| C         | -3.18388900 | -1.62399800 | -0.61054900 | H        | -1.28790600 | 1.19767600  | 2.73040700  |
| C         | -3.38188700 | -2.87835900 | -1.19680300 | C        | -3.33333000 | 3.59171900  | 0.47590400  |
| C         | -4.26083300 | -0.93076900 | -0.04519800 | H        | -2.13621800 | 2.82979700  | -1.14557800 |
| C         | -4.65922500 | -3.43198000 | -1.21098500 | C        | -3.58216600 | 3.54817500  | 1.84856000  |
| H         | -2.54769800 | -3.41256400 | -1.64120700 | H        | -3.04908400 | 2.63392700  | 3.72515200  |
| C         | -5.52927100 | -1.49590100 | -0.06645900 | H        | -3.89948900 | 4.26792500  | -0.15725500 |
| H         | -4.08303200 | 0.04129200  | 0.39994200  | H        | -4.33930200 | 4.19149500  | 2.28535300  |
| C         | -5.73576200 | -2.74783800 | -0.64800500 | C        | -3.17708400 | -1.61601600 | -0.60712100 |
| H         | -4.81244900 | -4.40454600 | -1.66789700 | C        | -3.37503500 | -2.86991400 | -1.19412800 |
| H         | -6.36169600 | -0.95534600 | 0.37223400  | C        | -4.25479100 | -0.92294100 | -0.04187500 |
| H         | -6.72789200 | -3.18614300 | -0.66445500 | C        | -4.65152300 | -3.42400500 | -1.20900100 |
| <b>4b</b> |             |             |             | H        | -2.53953800 | -3.40239800 | -1.63802500 |
| C         | 0.62131700  | 0.86897000  | -0.18313400 | C        | -5.52290900 | -1.48868600 | -0.06413600 |
| C         | -0.45255900 | 1.28338200  | 0.22065500  | H        | -4.07805300 | 0.04891700  | 0.40406500  |
| Zn        | 2.46658500  | 1.02833400  | -0.65709900 | C        | -5.72863000 | -2.74055000 | -0.64608000 |
| C         | 3.76873400  | 2.28212300  | -1.46363500 | H        | -4.80422100 | -4.39650500 | -1.66634100 |
| H         | 4.48419100  | 1.73459500  | -2.09115500 | H        | -6.35590500 | -0.94876900 | 0.37434200  |
| H         | 4.36958900  | 2.70539300  | -0.64582000 | N        | 3.48155100  | -0.62273100 | 0.32084800  |
| C         | 3.13527800  | 3.42653500  | -2.27375900 | C        | 2.94379900  | -1.76524800 | 0.70730200  |
| H         | 2.43878300  | 4.01643600  | -1.66931100 | C        | 4.81950100  | -0.69812600 | 0.63596200  |
| H         | 3.88388900  | 4.12480700  | -2.67217400 | H        | 1.90549400  | -2.03193900 | 0.58952500  |
| H         | 2.56452900  | 3.05056600  | -3.12931200 | C        | 5.08075500  | -1.90571100 | 1.22022000  |
| C         | -1.59109300 | 1.94976600  | 0.74332600  | H        | 5.49482200  | 0.11455700  | 0.41950600  |
| C         | -1.88220200 | 1.87876300  | 2.11567700  | H        | 5.98948200  | -2.34075300 | 1.60399000  |
| C         | -2.35779600 | 2.79816300  | -0.07349400 | N        | 3.87412300  | -2.58091600 | 1.25796700  |
| C         | -2.87730500 | 2.67817800  | 2.66449300  | C        | 3.64973600  | -3.92198800 | 1.77855800  |
| H         | -1.29357100 | 1.22003300  | 2.74467900  | H        | 4.26499500  | -4.64632400 | 1.24221900  |
| C         | -3.35253000 | 3.59409600  | 0.48158400  | H        | 3.88710000  | -3.96439300 | 2.84297000  |

|           |             |             |             |           |             |             |             |
|-----------|-------------|-------------|-------------|-----------|-------------|-------------|-------------|
| H         | 2.60159800  | -4.18401200 | 1.64192800  | H         | 2.55816200  | 3.04950800  | -3.12814900 |
| H         | -6.72055300 | -3.17932000 | -0.66298500 | C         | -1.59302400 | 1.91109000  | 0.72158700  |
| <b>5a</b> |             |             |             | C         | -1.86559000 | 1.85501200  | 2.09804700  |
| N         | -0.89253200 | -1.45890900 | -0.95419400 | C         | -2.34568800 | 2.77700600  | -0.08911000 |
| N         | 0.21264800  | -1.57807300 | -1.20412800 | C         | -2.84312500 | 2.67127300  | 2.65344200  |
| N         | -1.93672900 | -0.96374300 | -0.53608200 | H         | -1.28402700 | 1.18631000  | 2.72305400  |
| C         | -3.17708400 | -1.61601600 | -0.60712100 | C         | -3.32248300 | 3.58998400  | 0.47271900  |
| C         | -3.37503500 | -2.86991400 | -1.19412800 | H         | -2.13510000 | 2.81985900  | -1.15186600 |
| C         | -4.25479100 | -0.92294100 | -0.04187500 | C         | -3.56988400 | 3.54668800  | 1.84561300  |
| C         | -4.65152300 | -3.42400500 | -1.20900100 | H         | -3.03412200 | 2.63270900  | 3.72155700  |
| H         | -2.53953800 | -3.40239800 | -1.63802500 | H         | -3.88693900 | 4.26843100  | -0.15953100 |
| C         | -5.52290900 | -1.48868600 | -0.06413600 | H         | -4.32497700 | 4.19161500  | 2.28354200  |
| H         | -4.07805300 | 0.04891700  | 0.40406500  | C         | -3.17237400 | -1.60946200 | -0.60455800 |
| C         | -5.72863000 | -2.74055000 | -0.64608000 | C         | -3.37013400 | -2.86336200 | -1.19200900 |
| H         | -4.80422100 | -4.39650500 | -1.66634100 | C         | -4.25141600 | -0.91763300 | -0.03966200 |
| H         | -6.35590500 | -0.94876900 | 0.37434200  | C         | -4.64559500 | -3.41867300 | -1.20771200 |
| H         | -6.72055300 | -3.17932000 | -0.66298500 | H         | -2.53341500 | -3.39422100 | -1.63541200 |
| <b>5b</b> |             |             |             | C         | -5.51908700 | -1.48464700 | -0.06290400 |
| C         | 0.60252300  | 0.82323700  | -0.20559900 | H         | -4.07662300 | 0.05422700  | 0.40707500  |
| C         | -0.47304900 | 1.23494600  | 0.19853500  | C         | -5.72378900 | -2.73650600 | -0.64511200 |
| Zn        | 2.44876500  | 1.02349800  | -0.65390800 | H         | -4.79700800 | -4.39124200 | -1.66543400 |
| C         | 3.75013000  | 2.28416400  | -1.45056800 | H         | -6.35278200 | -0.94555400 | 0.37536200  |
| H         | 4.47036300  | 1.73291600  | -2.06961300 | N         | 3.47771900  | -0.62203700 | 0.32162600  |
| H         | 4.34487500  | 2.70917600  | -0.62925600 | C         | 2.94169200  | -1.76589300 | 0.70689600  |
| C         | 3.12796200  | 3.42690100  | -2.27148700 | C         | 4.81587500  | -0.69580700 | 0.63663800  |
| H         | 2.43148100  | 4.02477100  | -1.67487700 | H         | 1.90380500  | -2.03373000 | 0.58837800  |
| H         | 3.88340800  | 4.11808200  | -2.66929800 | C         | 5.07884900  | -1.90359300 | 1.21970900  |
| H         | 2.56032500  | 3.04922500  | -3.12832500 | H         | 5.49014300  | 0.11798200  | 0.42106400  |
| C         | -1.59331100 | 1.92473100  | 0.72939100  | H         | 5.98822200  | -2.33769700 | 1.60299900  |
| C         | -1.87251700 | 1.86267400  | 2.10428200  | N         | 3.87314300  | -2.58051700 | 1.25683100  |
| C         | -2.35110800 | 2.78388900  | -0.08380200 | C         | 3.64994500  | -3.92187700 | 1.77726500  |
| C         | -2.85529800 | 2.67389700  | 2.65757300  | H         | 4.26615600  | -4.64557000 | 1.24116900  |
| H         | -1.28790600 | 1.19767600  | 2.73040700  | H         | 3.88691600  | -3.96403500 | 2.84177200  |
| C         | -3.33333000 | 3.59171900  | 0.47590400  | H         | 2.60211600  | -4.18489800 | 1.64020700  |
| H         | -2.13621800 | 2.82979700  | -1.14557800 | H         | -6.71533700 | -3.17611400 | -0.66250900 |
| C         | -3.58216600 | 3.54817500  | 1.84856000  | N         | -0.88782600 | -1.46028500 | -0.95419600 |
| H         | -3.04908400 | 2.63392700  | 3.72515200  | N         | 0.23111200  | -1.51417000 | -1.17793700 |
| H         | -3.89948900 | 4.26792500  | -0.15725500 | N         | -1.93287100 | -0.95924400 | -0.53379300 |
| H         | -4.33930200 | 4.19149500  | 2.28535300  | C         | -3.17237400 | -1.60946200 | -0.60455800 |
| N         | 3.48155100  | -0.62273100 | 0.32084800  | C         | -3.37013400 | -2.86336200 | -1.19200900 |
| C         | 2.94379900  | -1.76524800 | 0.70730200  | C         | -4.25141600 | -0.91763300 | -0.03966200 |
| C         | 4.81950100  | -0.69812600 | 0.63596200  | C         | -4.64559500 | -3.41867300 | -1.20771200 |
| H         | 1.90549400  | -2.03193900 | 0.58952500  | H         | -2.53341500 | -3.39422100 | -1.63541200 |
| C         | 5.08075500  | -1.90571100 | 1.22022000  | C         | -5.51908700 | -1.48464700 | -0.06290400 |
| H         | 5.49482200  | 0.11455700  | 0.41950600  | H         | -4.07662300 | 0.05422700  | 0.40707500  |
| H         | 5.98948200  | -2.34075300 | 1.60399000  | C         | -5.72378900 | -2.73650600 | -0.64511200 |
| N         | 3.87412300  | -2.58091600 | 1.25796700  | H         | -4.79700800 | -4.39124200 | -1.66543400 |
| C         | 3.64973600  | -3.92198800 | 1.77855800  | H         | -6.35278200 | -0.94555400 | 0.37536200  |
| H         | 4.26499500  | -4.64632400 | 1.24221900  | H         | -6.71533700 | -3.17611400 | -0.66250900 |
| H         | 3.88710000  | -3.96439300 | 2.84297000  | <b>6b</b> |             |             |             |
| H         | 2.60159800  | -4.18401200 | 1.64192800  | C         | 0.58838300  | 0.78783700  | -0.22217600 |
| N         | -0.88782600 | -1.46028500 | -0.95419600 | C         | -0.48760800 | 1.20128100  | 0.18390400  |
| N         | 0.23111200  | -1.51417000 | -1.17793700 | Zn        | 2.43855800  | 1.02078700  | -0.65165100 |
| N         | -1.93287100 | -0.95924400 | -0.53379300 | C         | 3.73931200  | 2.28516900  | -1.44397600 |
| C         | 0.58838300  | 0.78783700  | -0.22217600 | H         | 4.46009700  | 1.72981900  | -2.05885500 |
| C         | -0.48760800 | 1.20128100  | 0.18390400  | H         | 4.33252100  | 2.71019800  | -0.62166700 |
| Zn        | 2.43855800  | 1.02078700  | -0.65165100 | C         | 3.12472100  | 3.42753900  | -2.27080200 |
| C         | 3.73931200  | 2.28516900  | -1.44397600 | H         | 2.42931000  | 4.03088600  | -1.67848700 |
| H         | 4.46009700  | 1.72981900  | -2.05885500 | H         | 3.88483500  | 4.11360400  | -2.66847000 |
| H         | 4.33252100  | 2.71019800  | -0.62166700 | H         | 2.55816200  | 3.04950800  | -3.12814900 |
| C         | 3.12472100  | 3.42753900  | -2.27080200 | C         | -1.59302400 | 1.91109000  | 0.72158700  |
| H         | 2.42931000  | 4.03088600  | -1.67848700 | C         | -1.86559000 | 1.85501200  | 2.09804700  |
| H         | 3.88483500  | 4.11360400  | -2.66847000 | C         | -2.34568800 | 2.77700600  | -0.08911000 |

|          |             |             |             |           |             |             |             |
|----------|-------------|-------------|-------------|-----------|-------------|-------------|-------------|
| C        | -2.84312500 | 2.67127300  | 2.65344200  | C         | 3.64996600  | -3.92172900 | 1.77616900  |
| H        | -1.28402700 | 1.18631000  | 2.72305400  | H         | 4.26700000  | -4.64488300 | 1.24032300  |
| C        | -3.32248300 | 3.58998400  | 0.47271900  | H         | 3.88663500  | -3.96351200 | 2.84074900  |
| H        | -2.13510000 | 2.81985900  | -1.15186600 | H         | 2.60240700  | -4.18558200 | 1.63876100  |
| C        | -3.56988400 | 3.54668800  | 1.84561300  | H         | -6.71024100 | -3.17382100 | -0.66238400 |
| H        | -3.03412200 | 2.63270900  | 3.72155700  | <b>7a</b> |             |             |             |
| H        | -3.88693900 | 4.26843100  | -0.15953100 | N         | -0.88432100 | -1.46702500 | -0.95624600 |
| H        | -4.32497700 | 4.19161500  | 2.28354200  | N         | 0.24629800  | -1.44912900 | -1.15035200 |
| N        | 3.47771900  | -0.62203700 | 0.32162600  | N         | -1.92801700 | -0.95306200 | -0.53131400 |
| C        | 2.94169200  | -1.76589300 | 0.70689600  | C         | -3.16701100 | -1.60209400 | -0.60188000 |
| C        | 4.81587500  | -0.69580700 | 0.63663800  | C         | -3.36500700 | -2.85638500 | -1.18974900 |
| H        | 1.90380500  | -2.03373000 | 0.58837800  | C         | -4.24833800 | -0.91263900 | -0.03763300 |
| C        | 5.07884900  | -1.90359300 | 1.21970900  | C         | -4.63935000 | -3.41337700 | -1.20644200 |
| H        | 5.49014300  | 0.11798200  | 0.42106400  | H         | -2.52710400 | -3.38560400 | -1.63263000 |
| H        | 5.98822200  | -2.33769700 | 1.60299900  | C         | -5.51554600 | -1.48127000 | -0.06194400 |
| N        | 3.87314300  | -2.58051700 | 1.25683100  | H         | -4.07641100 | 0.05930400  | 0.41012300  |
| C        | 3.64994500  | -3.92187700 | 1.77726500  | C         | -5.71917500 | -2.73310900 | -0.64437600 |
| H        | 4.26615600  | -4.64557000 | 1.24116900  | H         | -4.78892000 | -4.38608900 | -1.66463800 |
| H        | 3.88691600  | -3.96403500 | 2.84177200  | H         | -6.34998800 | -0.94304600 | 0.37613500  |
| H        | 2.60211600  | -4.18489800 | 1.64020700  | H         | -6.71024100 | -3.17382100 | -0.66238400 |
| <b>7</b> |             |             |             | <b>7b</b> |             |             |             |
| N        | -0.88432100 | -1.46702500 | -0.95624600 | C         | 0.57292700  | 0.74877200  | -0.23967400 |
| N        | 0.24629800  | -1.44912900 | -1.15035200 | C         | -0.50293000 | 1.16754000  | 0.16971700  |
| N        | -1.92801700 | -0.95306200 | -0.53131400 | Zn        | 2.42988800  | 1.01843700  | -0.64950500 |
| C        | 0.57292700  | 0.74877200  | -0.23967400 | C         | 3.72996200  | 2.28607500  | -1.43880100 |
| C        | -0.50293000 | 1.16754000  | 0.16971700  | H         | 4.45002100  | 1.72598900  | -2.05031500 |
| Zn       | 2.42988800  | 1.01843700  | -0.64950500 | H         | 4.32270300  | 2.71048900  | -0.61598500 |
| C        | 3.72996200  | 2.28607500  | -1.43880100 | C         | 3.12239100  | 3.42832400  | -2.27053700 |
| H        | 4.45002100  | 1.72598900  | -2.05031500 | H         | 2.42830700  | 4.03669200  | -1.68184400 |
| H        | 4.32270300  | 2.71048900  | -0.61598500 | H         | 3.88682800  | 4.10958400  | -2.66801800 |
| C        | 3.12239100  | 3.42832400  | -2.27053700 | H         | 2.55657900  | 3.05026000  | -3.12829300 |
| H        | 2.42830700  | 4.03669200  | -1.68184400 | C         | -1.59176400 | 1.89988400  | 0.71496100  |
| H        | 3.88682800  | 4.10958400  | -2.66801800 | C         | -1.85891000 | 1.84931100  | 2.09287000  |
| H        | 2.55657900  | 3.05026000  | -3.12829300 | C         | -2.34020500 | 2.77187500  | -0.09334500 |
| C        | -1.59176400 | 1.89988400  | 0.71496100  | C         | -2.83299800 | 2.66896200  | 2.64984500  |
| C        | -1.85891000 | 1.84931100  | 2.09287000  | H         | -1.28080500 | 1.17697200  | 2.71716700  |
| C        | -2.34020500 | 2.77187500  | -0.09334500 | C         | -3.31335300 | 3.58836100  | 0.47005100  |
| C        | -2.83299800 | 2.66896200  | 2.64984500  | H         | -2.13418900 | 2.81169200  | -1.15710000 |
| H        | -1.28080500 | 1.17697200  | 2.71716700  | C         | -3.56033400 | 3.54473900  | 1.84298100  |
| C        | -3.31335300 | 3.58836100  | 0.47005100  | H         | -3.02219600 | 2.63081800  | 3.71826600  |
| H        | -2.13418900 | 2.81169200  | -1.15710000 | H         | -3.87688800 | 4.26795800  | -0.16173200 |
| C        | -3.56033400 | 3.54473900  | 1.84298100  | H         | -4.31482600 | 4.18988100  | 2.28159900  |
| H        | -3.02219600 | 2.63081800  | 3.71826600  | N         | 3.47438600  | -0.62142800 | 0.32205600  |
| H        | -3.87688800 | 4.26795800  | -0.16173200 | C         | 2.93980000  | -1.76657500 | 0.70621400  |
| H        | -4.31482600 | 4.18988100  | 2.28159900  | C         | 4.81279500  | -0.69382500 | 0.63713300  |
| C        | -3.16701100 | -1.60209400 | -0.60188000 | H         | 1.90236700  | -2.03558500 | 0.58626400  |
| C        | -3.36500700 | -2.85638500 | -1.18974900 | C         | 5.07711200  | -1.90175600 | 1.21925700  |
| C        | -4.24833800 | -0.91263900 | -0.03763300 | H         | 5.48627300  | 0.12084400  | 0.42242700  |
| C        | -4.63935000 | -3.41337700 | -1.20644200 | H         | 5.98699000  | -2.33503000 | 1.60226600  |
| H        | -2.52710400 | -3.38560400 | -1.63263000 | N         | 3.87218200  | -2.58012000 | 1.25573800  |
| C        | -5.51554600 | -1.48127000 | -0.06194400 | C         | 3.64996600  | -3.92172900 | 1.77616900  |
| H        | -4.07641100 | 0.05930400  | 0.41012300  | H         | 4.26700000  | -4.64488300 | 1.24032300  |
| C        | -5.71917500 | -2.73310900 | -0.64437600 | H         | 3.88663500  | -3.96351200 | 2.84074900  |
| H        | -4.78892000 | -4.38608900 | -1.66463800 | H         | 2.60240700  | -4.18558200 | 1.63876100  |
| H        | -6.34998800 | -0.94304600 | 0.37613500  | <b>8</b>  |             |             |             |
| N        | 3.47438600  | -0.62142800 | 0.32205600  | N         | -0.88105200 | -1.47674200 | -0.95948900 |
| C        | 2.93980000  | -1.76657500 | 0.70621400  | N         | 0.25849300  | -1.38420500 | -1.12218100 |
| C        | 4.81279500  | -0.69382500 | 0.63713300  | N         | -1.92190100 | -0.94506900 | -0.52851200 |
| H        | 1.90236700  | -2.03558500 | 0.58626400  | C         | 0.55603100  | 0.70598400  | -0.25806100 |
| C        | 5.07711200  | -1.90175600 | 1.21925700  | C         | -0.51903300 | 1.13421900  | 0.15609600  |
| H        | 5.48627300  | 0.12084400  | 0.42242700  | Zn        | 2.42254700  | 1.01638800  | -0.64753800 |
| H        | 5.98699000  | -2.33503000 | 1.60226600  | C         | 3.72193800  | 2.28694200  | -1.43472300 |
| N        | 3.87218200  | -2.58012000 | 1.25573800  | H         | 4.44045900  | 1.72180700  | -2.04340500 |

|           |             |             |             |          |             |             |             |
|-----------|-------------|-------------|-------------|----------|-------------|-------------|-------------|
| H         | 4.31474400  | 2.71027900  | -0.61158200 | H        | 3.88898300  | 4.10607700  | -2.66773500 |
| C         | 3.12068200  | 3.42914700  | -2.27051800 | H        | 2.55546200  | 3.05120800  | -3.12862900 |
| H         | 2.42796300  | 4.04195400  | -1.68486800 | C        | -1.58978800 | 1.89070900  | 0.70930400  |
| H         | 3.88898300  | 4.10607700  | -2.66773500 | C        | -1.85270200 | 1.84500200  | 2.08858300  |
| H         | 2.55546200  | 3.05120800  | -3.12862900 | C        | -2.33497400 | 2.76803600  | -0.09679300 |
| C         | -1.58978800 | 1.89070900  | 0.70930400  | C        | -2.82459200 | 2.66692600  | 2.64675300  |
| C         | -1.85270200 | 1.84500200  | 2.08858300  | H        | -1.27838600 | 1.16906000  | 2.71245600  |
| C         | -2.33497400 | 2.76803600  | -0.09679300 | C        | -3.30571200 | 3.58688500  | 0.46779500  |
| C         | -2.82459200 | 2.66692600  | 2.64675300  | H        | -2.13373100 | 2.80481400  | -1.16154500 |
| H         | -1.27838600 | 1.16906000  | 2.71245600  | C        | -3.55280800 | 3.54265800  | 1.84066700  |
| C         | -3.30571200 | 3.58688500  | 0.46779500  | H        | -3.01275700 | 2.62851700  | 3.71529900  |
| H         | -2.13373100 | 2.80481400  | -1.16154500 | H        | -3.86892600 | 4.26683800  | -0.16380600 |
| C         | -3.55280800 | 3.54265800  | 1.84066700  | H        | -4.30756200 | 4.18720200  | 2.27968000  |
| H         | -3.01275700 | 2.62851700  | 3.71529900  | N        | 3.47146200  | -0.62087700 | 0.32226200  |
| H         | -3.86892600 | 4.26683800  | -0.16380600 | C        | 2.93808200  | -1.76729200 | 0.70538000  |
| H         | -4.30756200 | 4.18720200  | 2.27968000  | C        | 4.81019600  | -0.69211600 | 0.63751300  |
| C         | -3.16092100 | -1.59416000 | -0.59917100 | H        | 1.90114500  | -2.03752300 | 0.58310700  |
| C         | -3.35976200 | -2.84927500 | -1.18746600 | C        | 5.07554700  | -1.90015300 | 1.21886800  |
| C         | -4.24547500 | -0.90811900 | -0.03585500 | H        | 5.48310700  | 0.12323400  | 0.42364900  |
| C         | -4.63310000 | -3.40818400 | -1.20518200 | H        | 5.98582900  | -2.33269600 | 1.60172600  |
| H         | -2.52089000 | -3.37701900 | -1.62984700 | N        | 3.87126200  | -2.57972300 | 1.25472700  |
| C         | -5.51230200 | -1.47846400 | -0.06120200 | C        | 3.64988200  | -3.92158200 | 1.77524100  |
| H         | -4.07710900 | 0.06397200  | 0.41308300  | H        | 4.26765100  | -4.64424300 | 1.23962200  |
| C         | -5.71495800 | -2.73025300 | -0.64380700 | H        | 3.88632000  | -3.96291400 | 2.83987600  |
| H         | -4.78048400 | -4.38109100 | -1.66392200 | H        | 2.60256300  | -4.18613100 | 1.63750700  |
| H         | -6.34744500 | -0.94102600 | 0.37673800  | <b>9</b> |             |             |             |
| N         | 3.47146200  | -0.62087700 | 0.32226200  | N        | -0.87525400 | -1.49156900 | -0.96451400 |
| C         | 2.93808200  | -1.76729200 | 0.70538000  | N        | 0.27323700  | -1.28862100 | -1.08022900 |
| C         | 4.81019600  | -0.69211600 | 0.63751300  | N        | -1.91039300 | -0.93066500 | -0.52399000 |
| H         | 1.90114500  | -2.03752300 | 0.58310700  | C        | 0.52759900  | 0.63442200  | -0.28739500 |
| C         | 5.07554700  | -1.90015300 | 1.21886800  | C        | -0.54461600 | 1.08556100  | 0.13683800  |
| H         | 5.48310700  | 0.12323400  | 0.42364900  | Zn       | 2.41347100  | 1.01376800  | -0.64496000 |
| H         | 5.98582900  | -2.33269600 | 1.60172600  | C        | 3.71205500  | 2.28824700  | -1.43009300 |
| N         | 3.87126200  | -2.57972300 | 1.25472700  | H        | 4.42742800  | 1.71542000  | -2.03517200 |
| C         | 3.64988200  | -3.92158200 | 1.77524100  | H        | 4.30529300  | 2.70944200  | -0.60648200 |
| H         | 4.26765100  | -4.64424300 | 1.23962200  | C        | 3.11887800  | 3.43032300  | -2.27072000 |
| H         | 3.88632000  | -3.96291400 | 2.83987600  | H        | 2.42812600  | 4.04875400  | -1.68874200 |
| H         | 2.60256300  | -4.18613100 | 1.63750700  | H        | 3.89208100  | 4.10168700  | -2.66751600 |
| H         | -6.70549800 | -3.17220200 | -0.66249400 | H        | 2.55436500  | 3.05263500  | -3.12924500 |
| <b>8a</b> |             |             |             | C        | -1.58576500 | 1.87982000  | 0.70214200  |
| N         | -0.88105200 | -1.47674200 | -0.95948900 | C        | -1.84443900 | 1.84024000  | 2.08345200  |
| N         | 0.25849300  | -1.38420500 | -1.12218100 | C        | -2.32788700 | 2.76391700  | -0.10095300 |
| N         | -1.92190100 | -0.94506900 | -0.52851200 | C        | -2.81449800 | 2.66427000  | 2.64289000  |
| C         | -3.16092100 | -1.59416000 | -0.59917100 | H        | -1.27604900 | 1.15914000  | 2.70706500  |
| C         | -3.35976200 | -2.84927500 | -1.18746600 | C        | -3.29647700 | 3.58492700  | 0.46497500  |
| C         | -4.24547500 | -0.90811900 | -0.03585500 | H        | -2.13378600 | 2.79640400  | -1.16711700 |
| C         | -4.63310000 | -3.40818400 | -1.20518200 | C        | -3.54420200 | 3.53963200  | 1.83771300  |
| H         | -2.52089000 | -3.37701900 | -1.62984700 | H        | -3.00204500 | 2.62472700  | 3.71140600  |
| C         | -5.51230200 | -1.47846400 | -0.06120200 | H        | -3.85990900 | 4.26450900  | -0.16666200 |
| H         | -4.07710900 | 0.06397200  | 0.41308300  | H        | -4.30014300 | 4.18255700  | 2.27699700  |
| C         | -5.71495800 | -2.73025300 | -0.64380700 | C        | -3.15104500 | -1.58175300 | -0.59512000 |
| H         | -4.78048400 | -4.38109100 | -1.66392200 | C        | -3.35194200 | -2.83884300 | -1.18416500 |
| H         | -6.34744500 | -0.94102600 | 0.37673800  | C        | -4.24159800 | -0.90218100 | -0.03360300 |
| H         | -6.70549800 | -3.17220200 | -0.66249400 | C        | -4.62416000 | -3.40075800 | -1.20333600 |
| <b>8b</b> |             |             |             | H        | -2.51205600 | -3.36467000 | -1.62583500 |
| C         | 0.55603100  | 0.70598400  | -0.25806100 | C        | -5.50807300 | -1.47506900 | -0.06034700 |
| C         | -0.51903300 | 1.13421900  | 0.15609600  | H        | -4.07928200 | 0.07021000  | 0.41723200  |
| Zn        | 2.42254700  | 1.01638800  | -0.64753800 | C        | -5.70947100 | -2.72672800 | -0.64314800 |
| C         | 3.72193800  | 2.28694200  | -1.43472300 | H        | -4.76800200 | -4.37399600 | -1.66296600 |
| H         | 4.44045900  | 1.72180700  | -2.04340500 | H        | -6.34415000 | -0.93860800 | 0.37744400  |
| H         | 4.31474400  | 2.71027900  | -0.61158200 | N        | 3.46773400  | -0.62014800 | 0.32235100  |
| C         | 3.12068200  | 3.42914700  | -2.27051800 | C        | 2.93580100  | -1.76841000 | 0.70401600  |
| H         | 2.42796300  | 4.04195400  | -1.68486800 | C        | 4.80707100  | -0.68996100 | 0.63798300  |

|           |             |             |             |            |             |             |             |
|-----------|-------------|-------------|-------------|------------|-------------|-------------|-------------|
| H         | 1.89968400  | -2.04050600 | 0.57645600  | C          | 0.52273800  | 0.58690200  | -0.31998500 |
| C         | 5.07352800  | -1.89811300 | 1.21841800  | C          | -0.54623800 | 1.05948300  | 0.11299800  |
| H         | 5.47944600  | 0.12612700  | 0.42531400  | Zn         | 2.42478000  | 1.01742500  | -0.65538400 |
| H         | 5.98427400  | -2.32973100 | 1.60118500  | C          | 3.72306800  | 2.29423000  | -1.43958100 |
| N         | 3.86999300  | -2.57913400 | 1.25340900  | H          | 4.43614100  | 1.71648300  | -2.04255500 |
| C         | 3.64965000  | -3.92137400 | 1.77410800  | H          | 4.31654200  | 2.71387600  | -0.61557100 |
| H         | 4.26841000  | -4.64334400 | 1.23878900  | C          | 3.13428900  | 3.43607000  | -2.28275600 |
| H         | 3.88581100  | -3.96197100 | 2.83881100  | H          | 2.44468700  | 4.05756600  | -1.70273400 |
| H         | 2.60266200  | -4.18677200 | 1.63585600  | H          | 3.91012500  | 4.10437900  | -2.67932100 |
| H         | -6.69922200 | -3.17058200 | -0.66290400 | H          | 2.57017900  | 3.05845100  | -3.14146400 |
| <b>9a</b> |             |             |             | C          | -1.56615800 | 1.87916700  | 0.68612000  |
| N         | -0.87525400 | -1.49156900 | -0.96451400 | C          | -1.82338500 | 1.84293900  | 2.06880800  |
| N         | 0.27323700  | -1.28862100 | -1.08022900 | C          | -2.30742200 | 2.76703900  | -0.11515500 |
| N         | -1.91039300 | -0.93066500 | -0.52399000 | C          | -2.79281900 | 2.66784000  | 2.62882200  |
| C         | -3.15104500 | -1.58175300 | -0.59512000 | H          | -1.25880200 | 1.15875600  | 2.69244000  |
| C         | -3.35194200 | -2.83884300 | -1.18416500 | C          | -3.27519000 | 3.58891000  | 0.45143500  |
| C         | -4.24159800 | -0.90218100 | -0.03360300 | H          | -2.11772500 | 2.79701500  | -1.18214600 |
| C         | -4.62416000 | -3.40075800 | -1.20333600 | C          | -3.52346200 | 3.54293400  | 1.82410100  |
| H         | -2.51205600 | -3.36467000 | -1.62583500 | H          | -2.98034900 | 2.62734700  | 3.69723200  |
| C         | -5.50807300 | -1.47506900 | -0.06034700 | H          | -3.83898600 | 4.26794300  | -0.18034200 |
| H         | -4.07928200 | 0.07021000  | 0.41723200  | H          | -4.28037500 | 4.18465200  | 2.26342700  |
| C         | -5.70947100 | -2.72672800 | -0.64314800 | C          | -3.12822500 | -1.56827500 | -0.60432800 |
| H         | -4.76800200 | -4.37399600 | -1.66296600 | C          | -3.33053800 | -2.82706700 | -1.19399400 |
| H         | -6.34415000 | -0.93860800 | 0.37744400  | C          | -4.22289900 | -0.89341700 | -0.04418100 |
| H         | -6.69922200 | -3.17058200 | -0.66290400 | C          | -4.60228200 | -3.39094800 | -1.21406500 |
| <b>9b</b> |             |             |             | H          | -2.49014900 | -3.35167400 | -1.63516600 |
| C         | 0.52759900  | 0.63442200  | -0.28739500 | C          | -5.48928200 | -1.46793800 | -0.07176400 |
| C         | -0.54461600 | 1.08556100  | 0.13683800  | H          | -4.06469200 | 0.07920500  | 0.40785100  |
| Zn        | 2.41347100  | 1.01376800  | -0.64496000 | C          | -5.68990200 | -2.71947700 | -0.65466900 |
| C         | 3.71205500  | 2.28824700  | -1.43009300 | H          | -4.74378400 | -4.36439200 | -1.67429700 |
| H         | 4.42742800  | 1.71542000  | -2.03517200 | H          | -6.32594100 | -0.93203900 | 0.36589500  |
| H         | 4.30529300  | 2.70944200  | -0.60648200 | N          | 3.48195300  | -0.61453100 | 0.31046200  |
| C         | 3.11887800  | 3.43032300  | -2.27072000 | C          | 2.95078400  | -1.76394800 | 0.69121100  |
| H         | 2.42812600  | 4.04875400  | -1.68874200 | C          | 4.82173100  | -0.68355900 | 0.62639800  |
| H         | 3.89208100  | 4.10168700  | -2.66751600 | H          | 1.91528500  | -2.03725100 | 0.55889000  |
| H         | 2.55436500  | 3.05263500  | -3.12924500 | C          | 5.08870300  | -1.89177900 | 1.20633300  |
| C         | -1.58576500 | 1.87982000  | 0.70214200  | H          | 5.49389400  | 0.13289100  | 0.41450100  |
| C         | -1.84443900 | 1.84024000  | 2.08345200  | H          | 5.99968200  | -2.32288200 | 1.58911700  |
| C         | -2.32788700 | 2.76391700  | -0.10095300 | N          | 3.88554100  | -2.57356600 | 1.24079400  |
| C         | -2.81449800 | 2.66427000  | 2.64289000  | C          | 3.66574300  | -3.91604500 | 1.76164500  |
| H         | -1.27604900 | 1.15914000  | 2.70706500  | H          | 4.28513700  | -4.63762300 | 1.22658900  |
| C         | -3.29647700 | 3.58492700  | 0.46497500  | H          | 3.90163000  | -3.95613800 | 2.82642000  |
| H         | -2.13378600 | 2.79640400  | -1.16711700 | H          | 2.61896400  | -4.18189300 | 1.62293300  |
| C         | -3.54420200 | 3.53963200  | 1.83771300  | H          | -6.67918300 | -3.16451800 | -0.67514500 |
| H         | -3.00204500 | 2.62472700  | 3.71140600  | <b>10a</b> |             |             |             |
| H         | -3.85990900 | 4.26450900  | -0.16666200 | N          | -0.85432600 | -1.49401700 | -0.97888200 |
| H         | -4.30014300 | 4.18255700  | 2.27699700  | N          | 0.29882200  | -1.22150700 | -1.06505800 |
| N         | 3.46773400  | -0.62014800 | 0.32235100  | N          | -1.88501600 | -0.91513500 | -0.53294300 |
| C         | 2.93580100  | -1.76841000 | 0.70401600  | C          | -3.12822500 | -1.56827500 | -0.60432800 |
| C         | 4.80707100  | -0.68996100 | 0.63798300  | C          | -3.33053800 | -2.82706700 | -1.19399400 |
| H         | 1.89968400  | -2.04050600 | 0.57645600  | C          | -4.22289900 | -0.89341700 | -0.04418100 |
| C         | 5.07352800  | -1.89811300 | 1.21841800  | C          | -4.60228200 | -3.39094800 | -1.21406500 |
| H         | 5.47944600  | 0.12612700  | 0.42531400  | H          | -2.49014900 | -3.35167400 | -1.63516600 |
| H         | 5.98427400  | -2.32973100 | 1.60118500  | C          | -5.48928200 | -1.46793800 | -0.07176400 |
| N         | 3.86999300  | -2.57913400 | 1.25340900  | H          | -4.06469200 | 0.07920500  | 0.40785100  |
| C         | 3.64965000  | -3.92137400 | 1.77410800  | C          | -5.68990200 | -2.71947700 | -0.65466900 |
| H         | 4.26841000  | -4.64334400 | 1.23878900  | H          | -4.74378400 | -4.36439200 | -1.67429700 |
| H         | 3.88581100  | -3.96197100 | 2.83881100  | H          | -6.32594100 | -0.93203900 | 0.36589500  |
| H         | 2.60266200  | -4.18677200 | 1.63585600  | H          | -6.67918300 | -3.16451800 | -0.67514500 |
| <b>10</b> |             |             |             | <b>10b</b> |             |             |             |
| N         | -0.85432600 | -1.49401700 | -0.97888200 | C          | 0.52273800  | 0.58690200  | -0.31998500 |
| N         | 0.29882200  | -1.22150700 | -1.06505800 | C          | -0.54623800 | 1.05948300  | 0.11299800  |
| N         | -1.88501600 | -0.91513500 | -0.53294300 | Zn         | 2.42478000  | 1.01742500  | -0.65538400 |

|           |             |             |             |            |             |             |             |
|-----------|-------------|-------------|-------------|------------|-------------|-------------|-------------|
| C         | 3.72306800  | 2.29423000  | -1.43958100 | H          | -4.75819500 | -4.36850400 | -1.66228600 |
| H         | 4.43614100  | 1.71648300  | -2.04255500 | H          | -6.34188700 | -0.93693600 | 0.37787200  |
| H         | 4.31654200  | 2.71387600  | -0.61557100 | N          | 3.46514000  | -0.61961000 | 0.32234700  |
| C         | 3.13428900  | 3.43607000  | -2.28275600 | C          | 2.93414600  | -1.76930800 | 0.70287000  |
| H         | 2.44468700  | 4.05756600  | -1.70273400 | C          | 4.80502700  | -0.68845200 | 0.63835700  |
| H         | 3.91012500  | 4.10437900  | -2.67932100 | H          | 1.89880700  | -2.04290900 | 0.56926400  |
| H         | 2.57017900  | 3.05845100  | -3.14146400 | C          | 5.07211800  | -1.89668800 | 1.21817200  |
| C         | -1.56615800 | 1.87916700  | 0.68612000  | H          | 5.47714700  | 0.12807700  | 0.42663900  |
| C         | -1.82338500 | 1.84293900  | 2.06880800  | H          | 5.98315500  | -2.32767200 | 1.60094900  |
| C         | -2.30742200 | 2.76703900  | -0.11515500 | N          | 3.86904000  | -2.57865200 | 1.25250800  |
| C         | -2.79281900 | 2.66784000  | 2.62882200  | C          | 3.64937200  | -3.92119300 | 1.77338000  |
| H         | -1.25880200 | 1.15875600  | 2.69244000  | H          | 4.26889300  | -4.64267400 | 1.23835400  |
| C         | -3.27519000 | 3.58891000  | 0.45143500  | H          | 3.88523400  | -3.96118300 | 2.83816300  |
| H         | -2.11772500 | 2.79701500  | -1.18214600 | H          | 2.60263700  | -4.18713400 | 1.63458500  |
| C         | -3.52346200 | 3.54293400  | 1.82410100  | H          | -6.69465000 | -3.16954400 | -0.66335800 |
| H         | -2.98034900 | 2.62734700  | 3.69723200  | <b>11a</b> |             |             |             |
| H         | -3.83898600 | 4.26794300  | -0.18034200 | N          | -0.86948800 | -1.50084100 | -0.96751600 |
| H         | -4.28037500 | 4.18465200  | 2.26342700  | N          | 0.28483700  | -1.21132100 | -1.04649900 |
| N         | 3.48195300  | -0.61453100 | 0.31046200  | N          | -1.89901700 | -0.91768800 | -0.52033900 |
| C         | 2.95078400  | -1.76394800 | 0.69121100  | C          | -3.14300200 | -1.57138600 | -0.59176900 |
| C         | 4.82173100  | -0.68355900 | 0.62639800  | C          | -3.34564100 | -2.83063000 | -1.18160700 |
| H         | 1.91528500  | -2.03725100 | 0.55889000  | C          | -4.23872300 | -0.89775600 | -0.03197700 |
| C         | 5.08870300  | -1.89177900 | 1.20633300  | C          | -4.61728500 | -3.39501000 | -1.20190000 |
| H         | 5.49389400  | 0.13289100  | 0.41450100  | H          | -2.50513500 | -3.35492800 | -1.62265700 |
| H         | 5.99968200  | -2.32288200 | 1.58911700  | C          | -5.50508800 | -1.47269200 | -0.05976400 |
| N         | 3.88554100  | -2.57356600 | 1.24079400  | H          | -4.08156400 | 0.07492500  | 0.42036000  |
| C         | 3.66574300  | -3.91604500 | 1.76164500  | C          | -5.70549300 | -2.72419400 | -0.64270200 |
| H         | 4.28513700  | -4.63762300 | 1.22658900  | H          | -4.75819500 | -4.36850400 | -1.66228600 |
| H         | 3.90163000  | -3.95613800 | 2.82642000  | H          | -6.34188700 | -0.93693600 | 0.37787200  |
| H         | 2.61896400  | -4.18189300 | 1.62293300  | H          | -6.69465000 | -3.16954400 | -0.66335800 |
| <b>11</b> |             |             |             | <b>11b</b> |             |             |             |
| N         | -0.86948800 | -1.50084100 | -0.96751600 | C          | 0.50088600  | 0.56814900  | -0.31335500 |
| N         | 0.28483700  | -1.21132100 | -1.04649900 | C          | -0.56715400 | 1.04662500  | 0.12198900  |
| N         | -1.89901700 | -0.91768800 | -0.52033900 | Zn         | 2.40726900  | 1.01189800  | -0.64315800 |
| C         | 0.50088600  | 0.56814900  | -0.31335500 | C          | 3.70550500  | 2.28927400  | -1.42717100 |
| C         | -0.56715400 | 1.04662500  | 0.12198900  | H          | 4.41797600  | 1.71031900  | -2.02966300 |
| Zn        | 2.40726900  | 1.01189800  | -0.64315800 | H          | 4.29905500  | 2.70850800  | -0.60306100 |
| C         | 3.70550500  | 2.28927400  | -1.42717100 | C          | 3.11777300  | 3.43107800  | -2.27091500 |
| H         | 4.41797600  | 1.71031900  | -2.02966300 | H          | 2.42846900  | 4.05330200  | -1.69133100 |
| H         | 4.29905500  | 2.70850800  | -0.60306100 | H          | 3.89423500  | 4.09865800  | -2.66742700 |
| C         | 3.11777300  | 3.43107800  | -2.27091500 | H          | 2.55373700  | 3.05349800  | -3.12966200 |
| H         | 2.42846900  | 4.05330200  | -1.69133100 | C          | -1.58162400 | 1.87270000  | 0.69704800  |
| H         | 3.89423500  | 4.09865800  | -2.66742700 | C          | -1.83858400 | 1.83725500  | 2.08008700  |
| H         | 2.55373700  | 3.05349800  | -3.12966200 | C          | -2.32277900 | 2.76146200  | -0.10377600 |
| C         | -1.58162400 | 1.87270000  | 0.69704800  | C          | -2.80790300 | 2.66232400  | 2.64023800  |
| C         | -1.83858400 | 1.83725500  | 2.08008700  | H          | -1.27492200 | 1.15233200  | 2.70372700  |
| C         | -2.32277900 | 2.76146200  | -0.10377600 | C          | -3.29038900 | 3.58349200  | 0.46297200  |
| C         | -2.80790300 | 2.66232400  | 2.64023800  | H          | -2.13415500 | 2.79085100  | -1.17096500 |
| H         | -1.27492200 | 1.15233200  | 2.70372700  | C          | -3.53879000 | 3.53734100  | 1.83562400  |
| C         | -3.29038900 | 3.58349200  | 0.46297200  | H          | -2.99544600 | 2.62158100  | 3.70861900  |
| H         | -2.13415500 | 2.79085100  | -1.17096500 | H          | -3.85430600 | 4.26236900  | -0.16883400 |
| C         | -3.53879000 | 3.53734100  | 1.83562400  | H          | -4.29595800 | 4.17874500  | 2.27496200  |
| H         | -2.99544600 | 2.62158100  | 3.70861900  | N          | 3.46514000  | -0.61961000 | 0.32234700  |
| H         | -3.85430600 | 4.26236900  | -0.16883400 | C          | 2.93414600  | -1.76930800 | 0.70287000  |
| H         | -4.29595800 | 4.17874500  | 2.27496200  | C          | 4.80502700  | -0.68845200 | 0.63835700  |
| C         | -3.14300200 | -1.57138600 | -0.59176900 | H          | 1.89880700  | -2.04290900 | 0.56926400  |
| C         | -3.34564100 | -2.83063000 | -1.18160700 | C          | 5.07211800  | -1.89668800 | 1.21817200  |
| C         | -4.23872300 | -0.89775600 | -0.03197700 | H          | 5.47714700  | 0.12807700  | 0.42663900  |
| C         | -4.61728500 | -3.39501000 | -1.20190000 | H          | 5.98315500  | -2.32767200 | 1.60094900  |
| H         | -2.50513500 | -3.35492800 | -1.62265700 | N          | 3.86904000  | -2.57865200 | 1.25250800  |
| C         | -5.50508800 | -1.47269200 | -0.05976400 | C          | 3.64937200  | -3.92119300 | 1.77338000  |
| H         | -4.08156400 | 0.07492500  | 0.42036000  | H          | 4.26889300  | -4.64267400 | 1.23835400  |
| C         | -5.70549300 | -2.72419400 | -0.64270200 | H          | 3.88523400  | -3.96118300 | 2.83816300  |

|            |             |             |             |
|------------|-------------|-------------|-------------|
| H          | 2.60263700  | -4.18713400 | 1.63458500  |
| <b>12</b>  |             |             |             |
| C          | 0.50088600  | 0.56814900  | -0.31335500 |
| C          | -0.56715400 | 1.04662500  | 0.12198900  |
| Zn         | 2.40726900  | 1.01189800  | -0.64315800 |
| C          | 3.70550500  | 2.28927400  | -1.42717100 |
| H          | 4.41797600  | 1.71031900  | -2.02966300 |
| H          | 4.29905500  | 2.70850800  | -0.60306100 |
| C          | 3.11777300  | 3.43107800  | -2.27091500 |
| H          | 2.42846900  | 4.05330200  | -1.69133100 |
| H          | 3.89423500  | 4.09865800  | -2.66742700 |
| H          | 2.55373700  | 3.05349800  | -3.12966200 |
| C          | -1.58162400 | 1.87270000  | 0.69704800  |
| C          | -1.83858400 | 1.83725500  | 2.08008700  |
| C          | -2.32277900 | 2.76146200  | -0.10377600 |
| C          | -2.80790300 | 2.66232400  | 2.64023800  |
| H          | -1.27492200 | 1.15233200  | 2.70372700  |
| C          | -3.29038900 | 3.58349200  | 0.46297200  |
| H          | -2.13415500 | 2.79085100  | -1.17096500 |
| C          | -3.53879000 | 3.53734100  | 1.83562400  |
| H          | -2.99544600 | 2.62158100  | 3.70861900  |
| H          | -3.85430600 | 4.26236900  | -0.16883400 |
| H          | -4.29595800 | 4.17874500  | 2.27496200  |
| N          | 3.46514000  | -0.61961000 | 0.32234700  |
| C          | 2.93414600  | -1.76930800 | 0.70287000  |
| C          | 4.80502700  | -0.68845200 | 0.63835700  |
| H          | 1.89880700  | -2.04290900 | 0.56926400  |
| C          | 5.07211800  | -1.89668800 | 1.21817200  |
| H          | 5.47714700  | 0.12807700  | 0.42663900  |
| H          | 5.98315500  | -2.32767200 | 1.60094900  |
| N          | 3.86904000  | -2.57865200 | 1.25250800  |
| C          | 3.64937200  | -3.92119300 | 1.77338000  |
| H          | 4.26889300  | -4.64267400 | 1.23835400  |
| H          | 3.88523400  | -3.96118300 | 2.83816300  |
| H          | 2.60263700  | -4.18713400 | 1.63458500  |
| <b>12a</b> |             |             |             |
| N          | -0.86585700 | -1.50476200 | -0.96866500 |
| N          | 0.29227500  | -1.16594500 | -1.02698700 |
| N          | -1.89170400 | -0.90979100 | -0.51828500 |
| C          | -3.13858800 | -1.56527500 | -0.58974100 |
| C          | -3.34203100 | -2.82595600 | -1.18015900 |
| C          | -4.23745700 | -0.89547300 | -0.03105200 |
| C          | -4.61342800 | -3.39188100 | -1.20110700 |
| H          | -2.50117600 | -3.34928700 | -1.62083700 |
| C          | -5.50377300 | -1.47171200 | -0.05944300 |
| H          | -4.08352100 | 0.07737800  | 0.42221200  |
| C          | -5.70343600 | -2.72308400 | -0.64250100 |
| H          | -4.75252300 | -4.36551800 | -1.66195900 |
| H          | -6.34096900 | -0.93640100 | 0.37815900  |
| H          | -6.69219000 | -3.16941500 | -0.66369700 |
| <b>12b</b> |             |             |             |
| N          | -0.86585700 | -1.50476200 | -0.96866500 |
| N          | 0.29227500  | -1.16594500 | -1.02698700 |
| N          | -1.89170400 | -0.90979100 | -0.51828500 |
| C          | -3.13858800 | -1.56527500 | -0.58974100 |
| C          | -3.34203100 | -2.82595600 | -1.18015900 |
| C          | -4.23745700 | -0.89547300 | -0.03105200 |
| C          | -4.61342800 | -3.39188100 | -1.20110700 |
| H          | -2.50117600 | -3.34928700 | -1.62083700 |
| C          | -5.50377300 | -1.47171200 | -0.05944300 |
| H          | -4.08352100 | 0.07737800  | 0.42221200  |
| C          | -5.70343600 | -2.72308400 | -0.64250100 |
| H          | -4.75252300 | -4.36551800 | -1.66195900 |

|            |             |             |             |
|------------|-------------|-------------|-------------|
| H          | -6.34096900 | -0.93640100 | 0.37815900  |
| H          | -6.69219000 | -3.16941500 | -0.66369700 |
| <b>13</b>  |             |             |             |
| N          | -0.86064500 | -1.50807700 | -0.96944000 |
| N          | 0.30331900  | -1.10719300 | -1.00211600 |
| N          | -1.88108100 | -0.89901100 | -0.51569400 |
| C          | 0.45910100  | 0.46849200  | -0.35085000 |
| C          | -0.60183000 | 0.99347000  | 0.10267100  |
| Zn         | 2.39978300  | 1.00944500  | -0.64114500 |
| C          | 3.69799500  | 2.29077000  | -1.42425500 |
| H          | 4.40631000  | 1.70393100  | -2.02375300 |
| H          | 4.29198500  | 2.70709300  | -0.59933200 |
| C          | 3.11688200  | 3.43240400  | -2.27136300 |
| H          | 2.42963500  | 4.05924800  | -1.69438600 |
| H          | 3.89727100  | 4.09536600  | -2.66762400 |
| H          | 2.55315300  | 3.05516700  | -3.13028700 |
| C          | -1.57522000 | 1.86497800  | 0.69088400  |
| C          | -1.83135100 | 1.83442100  | 2.07641300  |
| C          | -2.31662600 | 2.75936900  | -0.10680000 |
| C          | -2.80015100 | 2.66025200  | 2.63749500  |
| H          | -1.27350200 | 1.14479700  | 2.70002200  |
| C          | -3.28356400 | 3.58208800  | 0.46086200  |
| H          | -2.13471300 | 2.78518600  | -1.17519500 |
| C          | -3.53271200 | 3.53468900  | 1.83346500  |
| H          | -2.98795700 | 2.61783600  | 3.70565900  |
| H          | -3.84850900 | 4.25985500  | -0.17103300 |
| H          | -4.29166600 | 4.17391300  | 2.27290000  |
| C          | -3.13295600 | -1.55689900 | -0.58690200 |
| C          | -3.33700800 | -2.81956100 | -1.17817500 |
| C          | -4.23565000 | -0.89217800 | -0.02974800 |
| C          | -4.60816700 | -3.38762400 | -1.20005800 |
| H          | -2.49560200 | -3.34150400 | -1.61830100 |
| C          | -5.50192900 | -1.47024900 | -0.05899500 |
| H          | -4.08595700 | 0.08090000  | 0.42464300  |
| C          | -5.70048700 | -2.72142500 | -0.64222200 |
| H          | -4.74480500 | -4.36141400 | -1.66153500 |
| H          | -6.33967900 | -0.93555700 | 0.37847800  |
| N          | 3.46228400  | -0.61917600 | 0.32230500  |
| C          | 2.93235700  | -1.77069200 | 0.70120700  |
| C          | 4.80286200  | -0.68677100 | 0.63885000  |
| H          | 1.89827500  | -2.04623700 | 0.55736600  |
| C          | 5.07073300  | -1.89510700 | 1.21788800  |
| H          | 5.47473200  | 0.13025500  | 0.42829400  |
| H          | 5.98215100  | -2.32536000 | 1.60057600  |
| N          | 3.86814500  | -2.57818100 | 1.25139600  |
| C          | 3.64930700  | -3.92111000 | 1.77229500  |
| H          | 4.26949700  | -4.64200500 | 1.23731400  |
| H          | 3.88516900  | -3.96058800 | 2.83709400  |
| H          | 2.60281500  | -4.18754200 | 1.63304000  |
| H          | -6.68872200 | -3.16903400 | -0.66417700 |
| <b>13a</b> |             |             |             |
| N          | -0.86064500 | -1.50807700 | -0.96944000 |
| N          | 0.30331900  | -1.10719300 | -1.00211600 |
| N          | -1.88108100 | -0.89901100 | -0.51569400 |
| C          | -3.13295600 | -1.55689900 | -0.58690200 |
| C          | -3.33700800 | -2.81956100 | -1.17817500 |
| C          | -4.23565000 | -0.89217800 | -0.02974800 |
| C          | -4.60816700 | -3.38762400 | -1.20005800 |
| H          | -2.49560200 | -3.34150400 | -1.61830100 |
| C          | -5.50192900 | -1.47024900 | -0.05899500 |
| H          | -4.08595700 | 0.08090000  | 0.42464300  |
| C          | -5.70048700 | -2.72142500 | -0.64222200 |
| H          | -4.74480500 | -4.36141400 | -1.66153500 |



|            |             |             |             |
|------------|-------------|-------------|-------------|
| H          | -6.33967900 | -0.93555700 | 0.37847800  |
| H          | -6.68872200 | -3.16903400 | -0.66417700 |
| <b>13b</b> |             |             |             |
| C          | 0.45910100  | 0.46849200  | -0.35085000 |
| C          | -0.60183000 | 0.99347000  | 0.10267100  |
| Zn         | 2.39978300  | 1.00944500  | -0.64114500 |
| C          | 3.69799500  | 2.29077000  | -1.42425500 |
| H          | 4.40631000  | 1.70393100  | -2.02375300 |
| H          | 4.29198500  | 2.70709300  | -0.59933200 |
| C          | 3.11688200  | 3.43240400  | -2.27136300 |
| H          | 2.42963500  | 4.05924800  | -1.69438600 |
| H          | 3.89727100  | 4.09536600  | -2.66762400 |
| H          | 2.55315300  | 3.05516700  | -3.13028700 |
| C          | -1.57522000 | 1.86497800  | 0.69088400  |
| C          | -1.83135100 | 1.83442100  | 2.07641300  |
| C          | -2.31662600 | 2.75936900  | -0.10680000 |
| C          | -2.80015100 | 2.66025200  | 2.63749500  |
| H          | -1.27350200 | 1.14479700  | 2.70002200  |
| C          | -3.28356400 | 3.58208800  | 0.46086200  |
| H          | -2.13471300 | 2.78518600  | -1.17519500 |
| C          | -3.53271200 | 3.53468900  | 1.83346500  |
| H          | -2.98795700 | 2.61783600  | 3.70565900  |
| H          | -3.84850900 | 4.25985500  | -0.17103300 |
| H          | -4.29166600 | 4.17391300  | 2.27290000  |
| N          | 3.46228400  | -0.61917600 | 0.32230500  |
| C          | 2.93235700  | -1.77069200 | 0.70120700  |
| C          | 4.80286200  | -0.68677100 | 0.63885000  |
| H          | 1.89827500  | -2.04623700 | 0.55736600  |
| C          | 5.07073300  | -1.89510700 | 1.21788800  |
| H          | 5.47473200  | 0.13025500  | 0.42829400  |
| H          | 5.98215100  | -2.32536000 | 1.60057600  |
| N          | 3.86814500  | -2.57818100 | 1.25139600  |
| C          | 3.64930700  | -3.92111000 | 1.77229500  |
| H          | 4.26949700  | -4.64200500 | 1.23731400  |
| H          | 3.88516900  | -3.96058800 | 2.83709400  |
| H          | 2.60281500  | -4.18754200 | 1.63304000  |
| <b>14</b>  |             |             |             |
| N          | -0.85442700 | -1.50989800 | -0.96963900 |
| N          | 0.31591200  | -1.05220600 | -0.97935000 |
| N          | -1.86845300 | -0.88712400 | -0.51311000 |
| C          | 0.43299500  | 0.41199400  | -0.37109200 |
| C          | -0.62704000 | 0.96001300  | 0.09122500  |
| Zn         | 2.39505000  | 1.00778400  | -0.63997500 |
| C          | 3.69366000  | 2.29147700  | -1.42262000 |
| H          | 4.39993500  | 1.70058200  | -2.02043300 |
| H          | 4.28762900  | 2.70620500  | -0.59703400 |
| C          | 3.11632600  | 3.43308400  | -2.27158300 |
| H          | 2.43017800  | 4.06245200  | -1.69607600 |
| H          | 3.89890100  | 4.09349400  | -2.66773300 |
| H          | 2.55274100  | 3.05604000  | -3.13061300 |
| C          | -1.57199900 | 1.86047500  | 0.68726400  |
| C          | -1.82733200 | 1.83278100  | 2.07410000  |
| C          | -2.31314900 | 2.75817600  | -0.10846900 |
| C          | -2.79567300 | 2.65909700  | 2.63595900  |
| H          | -1.27250800 | 1.14042300  | 2.69737500  |
| C          | -3.27970600 | 3.58141800  | 0.45957100  |
| H          | -2.13457700 | 2.78195600  | -1.17747300 |
| C          | -3.52917600 | 3.53308700  | 1.83212700  |
| H          | -2.98369700 | 2.61587900  | 3.70401800  |
| H          | -3.84527600 | 4.25869800  | -0.17222300 |
| H          | -4.28920500 | 4.17102000  | 2.27163800  |
| C          | -3.12699300 | -1.54732700 | -0.58357900 |
| C          | -3.33103300 | -2.81198800 | -1.17580300 |

|            |             |             |             |
|------------|-------------|-------------|-------------|
| C          | -4.23350300 | -0.88809400 | -0.02812400 |
| C          | -4.60191800 | -3.38267300 | -1.19888600 |
| H          | -2.48893400 | -3.33242100 | -1.61534600 |
| C          | -5.49971600 | -1.46847500 | -0.05844800 |
| H          | -4.08860200 | 0.08520900  | 0.42745700  |
| C          | -5.69677400 | -2.71941100 | -0.64192200 |
| H          | -4.73564100 | -4.35658600 | -1.66107700 |
| H          | -6.33809400 | -0.93455500 | 0.37883600  |
| N          | 3.46067300  | -0.61897600 | 0.32228300  |
| C          | 2.93136600  | -1.77145600 | 0.70005700  |
| C          | 4.80152700  | -0.68576100 | 0.63925000  |
| H          | 1.89815600  | -2.04794900 | 0.54976400  |
| C          | 5.06991800  | -1.89417100 | 1.21783200  |
| H          | 5.47318400  | 0.13163400  | 0.42943300  |
| H          | 5.98153700  | -2.32399900 | 1.60052800  |
| N          | 3.86761200  | -2.57792200 | 1.25075900  |
| C          | 3.64923600  | -3.92100000 | 1.77166000  |
| H          | 4.26985500  | -4.64164900 | 1.23684900  |
| H          | 3.88493300  | -3.96022700 | 2.83652000  |
| H          | 2.60289100  | -4.18773500 | 1.63204600  |
| H          | -6.68436300 | -3.16854500 | -0.66478600 |
| <b>14a</b> |             |             |             |
| N          | -0.85442700 | -1.50989800 | -0.96963900 |
| N          | 0.31591200  | -1.05220600 | -0.97935000 |
| N          | -1.86845300 | -0.88712400 | -0.51311000 |
| C          | -3.12699300 | -1.54732700 | -0.58357900 |
| C          | -3.33103300 | -2.81198800 | -1.17580300 |
| C          | -4.23350300 | -0.88809400 | -0.02812400 |
| C          | -4.60191800 | -3.38267300 | -1.19888600 |
| H          | -2.48893400 | -3.33242100 | -1.61534600 |
| C          | -5.49971600 | -1.46847500 | -0.05844800 |
| H          | -4.08860200 | 0.08520900  | 0.42745700  |
| C          | -5.69677400 | -2.71941100 | -0.64192200 |
| H          | -4.73564100 | -4.35658600 | -1.66107700 |
| H          | -6.33809400 | -0.93455500 | 0.37883600  |
| H          | -6.68436300 | -3.16854500 | -0.66478600 |
| <b>14b</b> |             |             |             |
| C          | 0.43299500  | 0.41199400  | -0.37109200 |
| C          | -0.62704000 | 0.96001300  | 0.09122500  |
| Zn         | 2.39505000  | 1.00778400  | -0.63997500 |
| C          | 3.69366000  | 2.29147700  | -1.42262000 |
| H          | 4.39993500  | 1.70058200  | -2.02043300 |
| H          | 4.28762900  | 2.70620500  | -0.59703400 |
| C          | 3.11632600  | 3.43308400  | -2.27158300 |
| H          | 2.43017800  | 4.06245200  | -1.69607600 |
| H          | 3.89890100  | 4.09349400  | -2.66773300 |
| H          | 2.55274100  | 3.05604000  | -3.13061300 |
| C          | -1.57199900 | 1.86047500  | 0.68726400  |
| C          | -1.82733200 | 1.83278100  | 2.07410000  |
| C          | -2.31314900 | 2.75817600  | -0.10846900 |
| C          | -2.79567300 | 2.65909700  | 2.63595900  |
| H          | -1.27250800 | 1.14042300  | 2.69737500  |
| C          | -3.27970600 | 3.58141800  | 0.45957100  |
| H          | -2.13457700 | 2.78195600  | -1.17747300 |
| C          | -3.52917600 | 3.53308700  | 1.83212700  |
| H          | -2.98369700 | 2.61587900  | 3.70401800  |
| H          | -3.84527600 | 4.25869800  | -0.17222300 |
| H          | -4.28920500 | 4.17102000  | 2.27163800  |
| N          | 3.46067300  | -0.61897600 | 0.32228300  |
| C          | 2.93136600  | -1.77145600 | 0.70005700  |
| C          | 4.80152700  | -0.68576100 | 0.63925000  |
| H          | 1.89815600  | -2.04794900 | 0.54976400  |
| C          | 5.06991800  | -1.89417100 | 1.21783200  |

|            |             |             |             |           |             |             |             |
|------------|-------------|-------------|-------------|-----------|-------------|-------------|-------------|
| H          | 5.47318400  | 0.13163400  | 0.42943300  | C         | 3.11487100  | 3.43418200  | -2.27179100 |
| H          | 5.98153700  | -2.32399900 | 1.60052800  | H         | 2.43072600  | 4.06842600  | -1.69926800 |
| N          | 3.86761200  | -2.57792200 | 1.25075900  | H         | 3.90203400  | 4.08951800  | -2.66738800 |
| C          | 3.64923600  | -3.92100000 | 1.77166600  | H         | 2.55150200  | 3.05820400  | -3.13141100 |
| H          | 4.26985500  | -4.64164900 | 1.23684900  | C         | -1.57435600 | 1.84833700  | 0.67997700  |
| H          | 3.88493300  | -3.96022700 | 2.83652000  | C         | -1.82093200 | 1.82841100  | 2.06851100  |
| H          | 2.60289100  | -4.18773500 | 1.63204600  | C         | -2.30796500 | 2.75484400  | -0.11186600 |
| <b>15</b>  |             |             |             | C         | -2.78573000 | 2.65786600  | 2.63307200  |
| C          | 0.43299500  | 0.41199400  | -0.37109200 | H         | -1.27104700 | 1.13022800  | 2.68982900  |
| C          | -0.62704000 | 0.96001300  | 0.09122500  | C         | -3.27153000 | 3.58148600  | 0.45732900  |
| Zn         | 2.39505000  | 1.00778400  | -0.63997500 | H         | -2.13484100 | 2.77427400  | -1.18194700 |
| C          | 3.69366000  | 2.29147700  | -1.42262000 | C         | -3.52132700 | 3.53037900  | 1.82954500  |
| H          | 4.39993500  | 1.70058200  | -2.02043300 | H         | -2.97264400 | 2.61466500  | 3.70132400  |
| H          | 4.28762900  | 2.70620500  | -0.59703400 | H         | -3.83710700 | 4.25961700  | -0.17353400 |
| C          | 3.11632600  | 3.43308400  | -2.27158300 | H         | -4.28317800 | 4.16589300  | 2.26951900  |
| H          | 2.43017800  | 4.06245200  | -1.69607600 | N         | 3.45745500  | -0.61879800 | 0.32200600  |
| H          | 3.89890100  | 4.09349400  | -2.66773300 | C         | 2.92977800  | -1.77284000 | 0.69731300  |
| H          | 2.55274100  | 3.05604000  | -3.13061300 | C         | 4.79829700  | -0.68354500 | 0.64035500  |
| C          | -1.57199900 | 1.86047500  | 0.68726400  | H         | 1.89829300  | -2.05136700 | 0.53862000  |
| C          | -1.82733200 | 1.83278100  | 2.07410000  | C         | 5.06807200  | -1.89211700 | 1.21804600  |
| C          | -2.31314900 | 2.75817600  | -0.10846900 | H         | 5.46896400  | 0.13510200  | 0.43222800  |
| C          | -2.79567300 | 2.65909700  | 2.63595900  | H         | 5.98000300  | -2.32084400 | 1.60123800  |
| H          | -1.27250800 | 1.14042300  | 2.69737500  | N         | 3.86663100  | -2.57766200 | 1.24928700  |
| C          | -3.27970600 | 3.58141800  | 0.45957100  | C         | 3.64919500  | -3.92080900 | 1.77018200  |
| H          | -2.13457700 | 2.78195600  | -1.17747300 | H         | 4.27077900  | -4.64112500 | 1.23599900  |
| C          | -3.52917600 | 3.53308700  | 1.83212700  | H         | 3.88419600  | -3.95961900 | 2.83523500  |
| H          | -2.98369700 | 2.61587900  | 3.70401800  | H         | 2.60316000  | -4.18836800 | 1.62984100  |
| H          | -3.84527600 | 4.25869800  | -0.17222300 | <b>16</b> |             |             |             |
| H          | -4.28920500 | 4.17102000  | 2.27163800  | N         | -0.82481700 | -1.51635000 | -0.97304300 |
| N          | 3.46067300  | -0.61897600 | 0.32228300  | N         | 0.34856100  | -0.99286300 | -0.95727800 |
| C          | 2.93136600  | -1.77145600 | 0.70005700  | N         | -1.81140100 | -0.83982300 | -0.50242300 |
| C          | 4.80152700  | -0.68576100 | 0.63925000  | C         | 0.38221300  | 0.34020700  | -0.39171800 |
| H          | 1.89815600  | -2.04794900 | 0.54976400  | C         | -0.75796500 | 0.81619200  | 0.04631300  |
| C          | 5.06991800  | -1.89417100 | 1.21783200  | Zn        | 2.37151900  | 1.00205300  | -0.63477000 |
| H          | 5.47318400  | 0.13163400  | 0.42943300  | C         | 3.67584200  | 2.28960300  | -1.41606400 |
| H          | 5.98153700  | -2.32399900 | 1.60052800  | H         | 4.38283200  | 1.69416600  | -2.00877400 |
| N          | 3.86761200  | -2.57792200 | 1.25075900  | H         | 4.26773000  | 2.70227900  | -0.58777800 |
| C          | 3.64923600  | -3.92100000 | 1.77166600  | C         | 3.11316400  | 3.43418800  | -2.27133500 |
| H          | 4.26985500  | -4.64164900 | 1.23684900  | H         | 2.43020200  | 4.07178600  | -1.70106000 |
| H          | 3.88493300  | -3.96022700 | 2.83652000  | H         | 3.90385900  | 4.08602100  | -2.66587500 |
| H          | 2.60289100  | -4.18773500 | 1.63204600  | H         | 2.55017900  | 3.05973900  | -3.13195800 |
| <b>15a</b> |             |             |             | C         | -1.58784600 | 1.82851800  | 0.67152500  |
| N          | -0.83973400 | -1.51264900 | -0.97036900 | C         | -1.81936600 | 1.82097100  | 2.06191800  |
| N          | 0.33675500  | -1.00057000 | -0.95916400 | C         | -2.30766800 | 2.74836300  | -0.11542900 |
| N          | -1.83963100 | -0.86341400 | -0.50835000 | C         | -2.77611300 | 2.65839800  | 2.63046700  |
| C          | -3.11370700 | -1.52435900 | -0.57547600 | H         | -1.27366200 | 1.11834300  | 2.68218300  |
| C          | -3.31555300 | -2.79210200 | -1.16950700 | C         | -3.26370800 | 3.58328500  | 0.45628900  |
| C          | -4.22718400 | -0.87596500 | -0.02334700 | H         | -2.13985200 | 2.76524500  | -1.18654700 |
| C          | -4.58501400 | -3.36970700 | -1.19600000 | C         | -3.51355400 | 3.53009000  | 1.82807900  |
| H          | -2.47172200 | -3.30953900 | -1.60794500 | H         | -2.95845800 | 2.61809300  | 3.69969200  |
| C          | -5.49257200 | -1.46302200 | -0.05692500 | H         | -3.82612100 | 4.26546500  | -0.17313200 |
| H          | -4.09346100 | 0.09772400  | 0.43492700  | H         | -4.27483200 | 4.16561400  | 2.26918600  |
| C          | -5.68543500 | -2.71354300 | -0.64118500 | C         | -3.10095200 | -1.49899800 | -0.56635300 |
| H          | -4.71090400 | -4.34377200 | -1.65995000 | C         | -3.29834700 | -2.76948900 | -1.16242100 |
| H          | -6.33263300 | -0.93139900 | 0.37982200  | C         | -4.22000900 | -0.86066600 | -0.01726700 |
| H          | -6.67118200 | -3.16662300 | -0.66629700 | C         | -4.56564000 | -3.35466100 | -1.19266000 |
| <b>15b</b> |             |             |             | H         | -2.45315300 | -3.28451700 | -1.59987800 |
| C          | 0.39644000  | 0.35439800  | -0.38909000 | C         | -5.48346500 | -1.45564500 | -0.05493000 |
| C          | -0.69163700 | 0.88884100  | 0.06882500  | H         | -4.09748800 | 0.11310400  | 0.44370100  |
| Zn         | 2.38344700  | 1.00425100  | -0.63732700 | C         | -5.67137300 | -2.70588600 | -0.64012200 |
| C          | 3.68417400  | 2.29149400  | -1.41925800 | H         | -4.68338300 | -4.32893000 | -1.65828100 |
| H          | 4.38935700  | 1.69621500  | -2.01399300 | H         | -6.32576600 | -0.92715700 | 0.38111700  |
| H          | 4.27704500  | 2.70421700  | -0.59192200 | N         | 3.45475800  | -0.61891300 | 0.32155000  |

|            |             |             |             |            |             |             |             |
|------------|-------------|-------------|-------------|------------|-------------|-------------|-------------|
| C          | 2.92890700  | -1.77399300 | 0.69520000  | N          | 0.35788200  | -0.98923300 | -0.95736900 |
| C          | 4.79520400  | -0.68162000 | 0.64142200  | N          | -1.78304000 | -0.81158800 | -0.49412100 |
| H          | 1.89854800  | -2.05476900 | 0.53491600  | C          | 0.37188900  | 0.33048900  | -0.39314900 |
| C          | 5.06651500  | -1.89024100 | 1.21854800  | C          | -0.82191100 | 0.74124100  | 0.02290800  |
| H          | 5.46468100  | 0.13832600  | 0.43454200  | Zn         | 2.36123600  | 1.00118700  | -0.63263200 |
| H          | 5.97871000  | -2.31779500 | 1.60245400  | C          | 3.66971700  | 2.28724700  | -1.41339700 |
| N          | 3.86616300  | -2.57776800 | 1.24799000  | H          | 4.37838000  | 1.69233900  | -2.00485700 |
| C          | 3.64938800  | -3.92083700 | 1.76884700  | H          | 4.26105100  | 2.70030900  | -0.58468600 |
| H          | 4.27181600  | -4.64100800 | 1.23540300  | C          | 3.11167000  | 3.43345100  | -2.27050800 |
| H          | 3.88351500  | -3.95940000 | 2.83413100  | H          | 2.42922000  | 4.07309300  | -1.70180200 |
| H          | 2.60362200  | -4.18916800 | 1.62781200  | H          | 3.90465400  | 4.08322300  | -2.66407100 |
| H          | -6.65514000 | -3.16316300 | -0.66741100 | H          | 2.54911800  | 3.06024100  | -3.13205700 |
| <b>16a</b> |             |             |             | C          | -1.60448100 | 1.80419200  | 0.66203900  |
| N          | -0.82481700 | -1.51635000 | -0.97304300 | C          | -1.82078100 | 1.81125200  | 2.05446700  |
| N          | 0.34856100  | -0.99286300 | -0.95727800 | C          | -2.31000500 | 2.73900700  | -0.11890400 |
| N          | -1.81140100 | -0.83982300 | -0.50242300 | C          | -2.76755600 | 2.65900800  | 2.62759200  |
| C          | -3.10095200 | -1.49899800 | -0.56635300 | H          | -1.27959800 | 1.10494000  | 2.67488800  |
| C          | -3.29834700 | -2.76948900 | -1.16242100 | C          | -3.25650700 | 3.58475300  | 0.45581500  |
| C          | -4.22000900 | -0.86066600 | -0.01726700 | H          | -2.14816800 | 2.75464800  | -1.19117400 |
| C          | -4.56564000 | -3.35466100 | -1.19266000 | C          | -3.50602300 | 3.53135900  | 1.82730500  |
| H          | -2.45315300 | -3.28451700 | -1.59987800 | H          | -2.94338600 | 2.62244600  | 3.69812000  |
| C          | -5.48346500 | -1.45564500 | -0.05493000 | H          | -3.81386700 | 4.27214200  | -0.17255400 |
| H          | -4.09748800 | 0.11310400  | 0.44370100  | H          | -4.26450800 | 4.16921400  | 2.26995200  |
| C          | -5.67137300 | -2.70588600 | -0.64012200 | C          | -3.08964800 | -1.47305700 | -0.55680500 |
| H          | -4.68338300 | -4.32893000 | -1.65828100 | C          | -3.28171400 | -2.74672900 | -1.15524300 |
| H          | -6.32576600 | -0.92715700 | 0.38111700  | C          | -4.21399800 | -0.84526000 | -0.01097000 |
| H          | -6.65514000 | -3.16316300 | -0.66741100 | C          | -4.54707800 | -3.33961600 | -1.18919200 |
| <b>16b</b> |             |             |             | H          | -2.43524300 | -3.25937300 | -1.59170800 |
| C          | 0.38221300  | 0.34020700  | -0.39171800 | C          | -5.47529500 | -1.44818700 | -0.05278300 |
| C          | -0.75796500 | 0.81619200  | 0.04631300  | H          | -4.10256400 | 0.12851600  | 0.45256700  |
| Zn         | 2.37151900  | 1.00205300  | -0.63477000 | C          | -5.65794700 | -2.69811700 | -0.63889200 |
| C          | 3.67584200  | 2.28960300  | -1.41606400 | H          | -4.65654100 | -4.31400600 | -1.65641800 |
| H          | 4.38283200  | 1.69416600  | -2.00877400 | H          | -6.31982900 | -0.92288500 | 0.38254200  |
| H          | 4.26773000  | 2.70227900  | -0.58777800 | N          | 3.45278000  | -0.61917300 | 0.32125000  |
| C          | 3.11316400  | 3.43418800  | -2.27133500 | C          | 2.92851600  | -1.77492100 | 0.69391500  |
| H          | 2.43020200  | 4.07178600  | -1.70106000 | C          | 4.79285500  | -0.68024800 | 0.64222500  |
| H          | 3.90385900  | 4.08602100  | -2.66587500 | H          | 1.89902900  | -2.05772200 | 0.53348400  |
| H          | 2.55017900  | 3.05973900  | -3.13195800 | C          | 5.06554700  | -1.88884300 | 1.21904500  |
| C          | -1.58784600 | 1.82851800  | 0.67152500  | H          | 5.46125700  | 0.14078400  | 0.43614400  |
| C          | -1.81936600 | 1.82097100  | 2.06191800  | H          | 5.97800200  | -2.31537700 | 1.60349100  |
| C          | -2.30766800 | 2.74836300  | -0.11542900 | N          | 3.86611900  | -2.57801100 | 1.24717500  |
| C          | -2.77611300 | 2.65839800  | 2.63046700  | C          | 3.64975500  | -3.92099900 | 1.76788700  |
| H          | -1.27366200 | 1.11834300  | 2.68218300  | H          | 4.27282000  | -4.64109300 | 1.23502900  |
| C          | -3.26370800 | 3.58328500  | 0.45628900  | H          | 3.88307700  | -3.95952600 | 2.83337400  |
| H          | -2.13985200 | 2.76524500  | -1.18654700 | H          | 2.60419400  | -4.18988100 | 1.62617600  |
| C          | -3.51355400 | 3.53009000  | 1.82807900  | H          | -6.63968200 | -3.15958600 | -0.66830400 |
| H          | -2.95845800 | 2.61809300  | 3.69969200  | <b>17a</b> |             |             |             |
| H          | -3.82612100 | 4.26546500  | -0.17313200 | N          | -0.81147800 | -1.52015100 | -0.97636100 |
| H          | -4.27483200 | 4.16561400  | 2.26918600  | N          | 0.35788200  | -0.98923300 | -0.95736900 |
| N          | 3.45475800  | -0.61891300 | 0.32155000  | N          | -1.78304000 | -0.81158800 | -0.49412100 |
| C          | 2.92890700  | -1.77399300 | 0.69520000  | C          | -3.08964800 | -1.47305700 | -0.55680500 |
| C          | 4.79520400  | -0.68162000 | 0.64142200  | C          | -3.28171400 | -2.74672900 | -1.15524300 |
| H          | 1.89854800  | -2.05476900 | 0.53491600  | C          | -4.21399800 | -0.84526000 | -0.01097000 |
| C          | 5.06651500  | -1.89024100 | 1.21854800  | C          | -4.54707800 | -3.33961600 | -1.18919200 |
| H          | 5.46468100  | 0.13832600  | 0.43454200  | H          | -2.43524300 | -3.25937300 | -1.59170800 |
| H          | 5.97871000  | -2.31779500 | 1.60245400  | C          | -5.47529500 | -1.44818700 | -0.05278300 |
| N          | 3.86616300  | -2.57776800 | 1.24799000  | H          | -4.10256400 | 0.12851600  | 0.45256700  |
| C          | 3.64938800  | -3.92083700 | 1.76884700  | C          | -5.65794700 | -2.69811700 | -0.63889200 |
| H          | 4.27181600  | -4.64100800 | 1.23540300  | H          | -4.65654100 | -4.31400600 | -1.65641800 |
| H          | 3.88351500  | -3.95940000 | 2.83413100  | H          | -6.31982900 | -0.92288500 | 0.38254200  |
| H          | 2.60362200  | -4.18916800 | 1.62781200  | H          | -6.63968200 | -3.15958600 | -0.66830400 |
| <b>17</b>  |             |             |             | <b>17b</b> |             |             |             |
| N          | -0.81147800 | -1.52015100 | -0.97636100 | C          | 0.37188900  | 0.33048900  | -0.39314900 |

|           |             |             |             |            |             |             |             |
|-----------|-------------|-------------|-------------|------------|-------------|-------------|-------------|
| C         | -0.82191100 | 0.74124100  | 0.02290800  | H          | -4.12399800 | 0.17883600  | 0.48124400  |
| Zn        | 2.36123600  | 1.00118700  | -0.63263200 | C          | -5.61609700 | -2.67317600 | -0.63480100 |
| C         | 3.66971700  | 2.28724700  | -1.41339700 | H          | -4.56979700 | -4.26389300 | -1.64974200 |
| H         | 4.37838000  | 1.69233900  | -2.00485700 | H          | -6.30644600 | -0.91080600 | 0.38737900  |
| H         | 4.26105100  | 2.70030900  | -0.58468600 | N          | 3.44849400  | -0.62026600 | 0.32099300  |
| C         | 3.11167000  | 3.43345100  | -2.27050800 | C          | 2.92839200  | -1.77733700 | 0.69218500  |
| H         | 2.42922000  | 4.07309300  | -1.70180200 | C          | 4.78793700  | -0.67757500 | 0.64384300  |
| H         | 3.90465400  | 4.08322300  | -2.66407100 | H          | 1.90054600  | -2.06463200 | 0.53417400  |
| H         | 2.54911800  | 3.06024100  | -3.13205700 | C          | 5.06430500  | -1.88596100 | 1.22025900  |
| C         | -1.60448100 | 1.80419200  | 0.66203900  | H          | 5.45376500  | 0.14589600  | 0.43903700  |
| C         | -1.82078100 | 1.81125200  | 2.05446700  | H          | 5.97760800  | -2.30995800 | 1.60558700  |
| C         | -2.31000500 | 2.73900700  | -0.11890400 | N          | 3.86707400  | -2.57893300 | 1.24610900  |
| C         | -2.76755600 | 2.65900800  | 2.62759200  | C          | 3.65141700  | -3.92177900 | 1.76614900  |
| H         | -1.27959800 | 1.10494000  | 2.67488800  | H          | 4.27581400  | -4.64174200 | 1.23452400  |
| C         | -3.25650700 | 3.58475300  | 0.45581500  | H          | 3.88270400  | -3.96070100 | 2.83213900  |
| H         | -2.14816800 | 2.75464800  | -1.19117400 | H          | 2.60629300  | -4.19166300 | 1.62260600  |
| C         | -3.50602300 | 3.53135900  | 1.82730500  | H          | -6.59025600 | -3.14990400 | -0.67212100 |
| H         | -2.94338600 | 2.62244600  | 3.69812000  | <b>18a</b> |             |             |             |
| H         | -3.81386700 | 4.27214200  | -0.17255400 | N          | -0.77618000 | -1.53252200 | -0.98733400 |
| H         | -4.26450800 | 4.16921400  | 2.26995200  | N          | 0.38238600  | -0.97545000 | -0.95691000 |
| N         | 3.45278000  | -0.61917300 | 0.32125000  | N          | -1.70944400 | -0.72249400 | -0.46620400 |
| C         | 2.92851600  | -1.77492100 | 0.69391500  | C          | -3.05855300 | -1.39046700 | -0.52553600 |
| C         | 4.79285500  | -0.68024800 | 0.64222500  | C          | -3.23055800 | -2.67075600 | -1.13067300 |
| H         | 1.89902900  | -2.05772200 | 0.53348400  | C          | -4.20030000 | -0.79452500 | 0.01055600  |
| C         | 5.06554700  | -1.88884300 | 1.21904500  | C          | -4.48749200 | -3.28957800 | -1.17730900 |
| H         | 5.46125700  | 0.14078400  | 0.43614400  | H          | -2.37800300 | -3.17309900 | -1.56354200 |
| H         | 5.97800200  | -2.31537700 | 1.60349100  | C          | -5.45339700 | -1.42418500 | -0.04494100 |
| N         | 3.86611900  | -2.57801100 | 1.24717500  | H          | -4.12399800 | 0.17883600  | 0.48124400  |
| C         | 3.64975500  | -3.92099900 | 1.76788700  | C          | -5.61609700 | -2.67317600 | -0.63480100 |
| H         | 4.27282000  | -4.64109300 | 1.23502900  | H          | -4.56979700 | -4.26389300 | -1.64974200 |
| H         | 3.88307700  | -3.95952600 | 2.83337400  | H          | -6.30644600 | -0.91080600 | 0.38737900  |
| H         | 2.60419400  | -4.18988100 | 1.62617600  | H          | -6.59025600 | -3.14990400 | -0.67212100 |
| <b>18</b> |             |             |             | <b>18b</b> |             |             |             |
| N         | -0.77618000 | -1.53252200 | -0.98733400 | C          | 0.33544800  | 0.30272100  | -0.39662900 |
| N         | 0.38238600  | -0.97545000 | -0.95691000 | C          | -0.99484700 | 0.53094300  | -0.04251800 |
| N         | -1.70944400 | -0.72249400 | -0.46620400 | Zn         | 2.33359500  | 1.00181800  | -0.62686300 |
| C         | 0.33544800  | 0.30272100  | -0.39662900 | C          | 3.65681500  | 2.28018300  | -1.40713800 |
| C         | -0.99484700 | 0.53094300  | -0.04251800 | H          | 4.36738800  | 1.68476400  | -1.99612800 |
| Zn        | 2.33359500  | 1.00181800  | -0.62686300 | H          | 4.24731300  | 2.69322000  | -0.57742100 |
| C         | 3.65681500  | 2.28018300  | -1.40713800 | C          | 3.10820400  | 3.42981500  | -2.26744400 |
| H         | 4.36738800  | 1.68476400  | -1.99612800 | H          | 2.42603300  | 4.07261000  | -1.70173300 |
| H         | 4.24731300  | 2.69322000  | -0.57742100 | H          | 3.90533200  | 4.07640200  | -2.65845600 |
| C         | 3.10820400  | 3.42981500  | -2.26744400 | H          | 2.54702300  | 3.05915900  | -3.13120900 |
| H         | 2.42603300  | 4.07261000  | -1.70173300 | C          | -1.66876500 | 1.70881600  | 0.62763100  |
| H         | 3.90533200  | 4.07640200  | -2.65845600 | C          | -1.83360900 | 1.76848300  | 2.02680300  |
| H         | 2.54702300  | 3.05915900  | -3.13120900 | C          | -2.32459000 | 2.69599000  | -0.13235100 |
| C         | -1.66876500 | 1.70881600  | 0.62763100  | C          | -2.74062700 | 2.65605200  | 2.61475300  |
| C         | -1.83360900 | 1.76848300  | 2.02680300  | H          | -1.30715500 | 1.05373200  | 2.65135700  |
| C         | -2.32459000 | 2.69599000  | -0.13235100 | C          | -3.23215900 | 3.58321300  | 0.45305800  |
| C         | -2.74062700 | 2.65605200  | 2.61475300  | H          | -2.18260100 | 2.71158600  | -1.20809100 |
| H         | -1.30715500 | 1.05373200  | 2.65135700  | C          | -3.47895300 | 3.53668800  | 1.82453200  |
| C         | -3.23215900 | 3.58321300  | 0.45305800  | H          | -2.88957000 | 2.63353700  | 3.68997800  |
| H         | -2.18260100 | 2.71158600  | -1.20809100 | H          | -3.76722000 | 4.28999700  | -0.17356800 |
| C         | -3.47895300 | 3.53668800  | 1.82453200  | H          | -4.22070400 | 4.18990000  | 2.27326800  |
| H         | -2.88957000 | 2.63353700  | 3.68997800  | N          | 3.44849400  | -0.62026600 | 0.32099300  |
| H         | -3.76722000 | 4.28999700  | -0.17356800 | C          | 2.92839200  | -1.77733700 | 0.69218500  |
| H         | -4.22070400 | 4.18990000  | 2.27326800  | C          | 4.78793700  | -0.67757500 | 0.64384300  |
| C         | -3.05855300 | -1.39046700 | -0.52553600 | H          | 1.90054600  | -2.06463200 | 0.53417400  |
| C         | -3.23055800 | -2.67075600 | -1.13067300 | C          | 5.06430500  | -1.88596100 | 1.22025900  |
| C         | -4.20030000 | -0.79452500 | 0.01055600  | H          | 5.45376500  | 0.14589600  | 0.43903700  |
| C         | -4.48749200 | -3.28957800 | -1.17730900 | H          | 5.97760800  | -2.30995800 | 1.60558700  |
| H         | -2.37800300 | -3.17309900 | -1.56354200 | N          | 3.86707400  | -2.57893300 | 1.24610900  |
| C         | -5.45339700 | -1.42418500 | -0.04494100 | C          | 3.65141700  | -3.92177900 | 1.76614900  |

|   |            |             |            |
|---|------------|-------------|------------|
| H | 4.27581400 | -4.64174200 | 1.23452400 |
| H | 3.88270400 | -3.96070100 | 2.83213900 |

|   |            |             |            |
|---|------------|-------------|------------|
| H | 2.60629300 | -4.19166300 | 1.62260600 |
|---|------------|-------------|------------|

## 9.2 B3LYP-D3BJ geometries for 20-ts

|           |             |             |             |
|-----------|-------------|-------------|-------------|
| <b>1</b>  |             |             |             |
| N         | 0.05709000  | -1.79382300 | -1.03840000 |
| N         | 1.02877200  | -2.04389200 | -1.55706100 |
| N         | -0.92571500 | -1.44243800 | -0.37772300 |
| C         | 1.42793200  | 0.26265300  | 0.89571000  |
| C         | 2.57797400  | 0.07458300  | 0.52644100  |
| Zn        | -0.40332800 | 0.40947400  | 1.55334100  |
| C         | 3.94346700  | -0.12690600 | 0.15932600  |
| C         | 4.97031900  | 0.43505100  | 0.94105100  |
| C         | 4.30364700  | -0.88868500 | -0.96819200 |
| C         | 6.30583500  | 0.24292300  | 0.60571000  |
| H         | 4.70323100  | 1.01949000  | 1.81466800  |
| C         | 5.64242100  | -1.07752800 | -1.29785500 |
| H         | 3.52477100  | -1.33416800 | -1.57522400 |
| C         | 6.64964600  | -0.51357500 | -0.51506300 |
| H         | 7.08269600  | 0.68352300  | 1.22319500  |
| H         | 5.90055500  | -1.67140300 | -2.16948900 |
| H         | 7.69292000  | -0.66397800 | -0.77409800 |
| C         | -2.20551000 | -1.87004200 | -0.82792100 |
| C         | -2.40477500 | -2.58706800 | -2.01212300 |
| C         | -3.29193000 | -1.53454600 | -0.01640300 |
| C         | -3.69379900 | -2.96740800 | -2.37479100 |
| H         | -1.56489700 | -2.85191900 | -2.64648300 |
| C         | -4.57355100 | -1.92180700 | -0.39019300 |
| H         | -3.11713900 | -0.98488400 | 0.89995500  |
| C         | -4.78223100 | -2.63854900 | -1.56870200 |
| H         | -3.84451100 | -3.52677900 | -3.29247200 |
| H         | -5.41390700 | -1.66543900 | 0.24666300  |
| C         | -1.68236200 | 0.14560400  | 3.05385000  |
| H         | -1.48573100 | 0.96261100  | 3.76266600  |
| H         | -2.71392600 | 0.31744800  | 2.71547700  |
| C         | -1.60251000 | -1.19482100 | 3.80390100  |
| H         | -2.29696000 | -1.24478000 | 4.65349000  |
| H         | -1.83571500 | -2.04464200 | 3.15330800  |
| H         | -0.59928100 | -1.37483800 | 4.20287900  |
| N         | -1.19512500 | 2.02319400  | 0.25626300  |
| C         | -0.58079800 | 2.46326400  | -0.82588500 |
| C         | -2.31003300 | 2.81469100  | 0.41432100  |
| H         | 0.34681900  | 2.06958100  | -1.21391100 |
| C         | -2.35925200 | 3.73959900  | -0.59184400 |
| H         | -2.99212800 | 2.66863700  | 1.23701200  |
| H         | -3.06193400 | 4.52564900  | -0.81741500 |
| C         | -0.87166600 | 4.23380200  | -2.58336600 |
| H         | -0.70840800 | 5.28827100  | -2.35437600 |
| H         | 0.05308500  | 3.81434700  | -2.97702800 |
| H         | -1.64935800 | 4.14578400  | -3.34402600 |
| N         | -1.24911500 | 3.50353700  | -1.38165400 |
| H         | -5.78382800 | -2.94116700 | -1.85479600 |
| <b>1a</b> |             |             |             |
| N         | 0.05709000  | -1.79382300 | -1.03840000 |
| N         | 1.02877200  | -2.04389200 | -1.55706100 |
| N         | -0.92571500 | -1.44243800 | -0.37772300 |

|           |             |             |             |
|-----------|-------------|-------------|-------------|
| C         | -2.20551000 | -1.87004200 | -0.82792100 |
| C         | -2.40477500 | -2.58706800 | -2.01212300 |
| C         | -3.29193000 | -1.53454600 | -0.01640300 |
| C         | -3.69379900 | -2.96740800 | -2.37479100 |
| H         | -1.56489700 | -2.85191900 | -2.64648300 |
| C         | -4.57355100 | -1.92180700 | -0.39019300 |
| H         | -3.11713900 | -0.98488400 | 0.89995500  |
| C         | -4.78223100 | -2.63854900 | -1.56870200 |
| H         | -3.84451100 | -3.52677900 | -3.29247200 |
| H         | -5.41390700 | -1.66543900 | 0.24666300  |
| H         | -5.78382800 | -2.94116700 | -1.85479600 |
| <b>1b</b> |             |             |             |
| C         | 1.42793200  | 0.26265300  | 0.89571000  |
| C         | 2.57797400  | 0.07458300  | 0.52644100  |
| Zn        | -0.40332800 | 0.40947400  | 1.55334100  |
| C         | 3.94346700  | -0.12690600 | 0.15932600  |
| C         | 4.97031900  | 0.43505100  | 0.94105100  |
| C         | 4.30364700  | -0.88868500 | -0.96819200 |
| C         | 6.30583500  | 0.24292300  | 0.60571000  |
| H         | 4.70323100  | 1.01949000  | 1.81466800  |
| C         | 5.64242100  | -1.07752800 | -1.29785500 |
| H         | 3.52477100  | -1.33416800 | -1.57522400 |
| C         | 6.64964600  | -0.51357500 | -0.51506300 |
| H         | 7.08269600  | 0.68352300  | 1.22319500  |
| H         | 5.90055500  | -1.67140300 | -2.16948900 |
| H         | 7.69292000  | -0.66397800 | -0.77409800 |
| C         | -1.68236200 | 0.14560400  | 3.05385000  |
| H         | -1.48573100 | 0.96261100  | 3.76266600  |
| H         | -2.71392600 | 0.31744800  | 2.71547700  |
| C         | -1.60251000 | -1.19482100 | 3.80390100  |
| H         | -2.29696000 | -1.24478000 | 4.65349000  |
| H         | -1.83571500 | -2.04464200 | 3.15330800  |
| H         | -0.59928100 | -1.37483800 | 4.20287900  |
| N         | -1.19512500 | 2.02319400  | 0.25626300  |
| C         | -0.58079800 | 2.46326400  | -0.82588500 |
| C         | -2.31003300 | 2.81469100  | 0.41432100  |
| H         | 0.34681900  | 2.06958100  | -1.21391100 |
| C         | -2.35925200 | 3.73959900  | -0.59184400 |
| H         | -2.99212800 | 2.66863700  | 1.23701200  |
| H         | -3.06193400 | 4.52564900  | -0.81741500 |
| C         | -0.87166600 | 4.23380200  | -2.58336600 |
| H         | -0.70840800 | 5.28827100  | -2.35437600 |
| H         | 0.05308500  | 3.81434700  | -2.97702800 |
| H         | -1.64935800 | 4.14578400  | -3.34402600 |
| N         | -1.24911500 | 3.50353700  | -1.38165400 |
| <b>2</b>  |             |             |             |
| N         | 0.09466300  | -1.75866300 | -1.02151400 |
| N         | 1.07150500  | -2.00457100 | -1.53313200 |
| N         | -0.89011100 | -1.40586800 | -0.36475300 |
| C         | 1.40494400  | 0.23928500  | 0.88354000  |
| C         | 2.54242400  | 0.02690800  | 0.49134900  |
| Zn        | -0.42875400 | 0.39124600  | 1.53656400  |

|           |             |             |             |          |             |             |             |
|-----------|-------------|-------------|-------------|----------|-------------|-------------|-------------|
| C         | 3.91026800  | -0.16940700 | 0.13115800  | C        | 6.25880300  | 0.24302200  | 0.61140600  |
| C         | 4.91615600  | 0.40835300  | 0.92822200  | H        | 4.62474200  | 0.98626600  | 1.79833800  |
| C         | 4.29863600  | -0.92394900 | -0.99169300 | C        | 5.64578100  | -1.08649100 | -1.30283600 |
| C         | 6.25880300  | 0.24302200  | 0.61140600  | H        | 3.53779300  | -1.38219900 | -1.61136000 |
| H         | 4.62474200  | 0.98626600  | 1.79833800  | C        | 6.63147500  | -0.50399900 | -0.50648600 |
| C         | 5.64578100  | -1.08649100 | -1.30283600 | H        | 7.01859900  | 0.69733200  | 1.24012600  |
| H         | 3.53779300  | -1.38219900 | -1.61136000 | H        | 5.92740800  | -1.67365500 | -2.17179400 |
| C         | 6.63147500  | -0.50399900 | -0.50648600 | H        | 7.68072200  | -0.63315400 | -0.75260800 |
| H         | 7.01859900  | 0.69733200  | 1.24012600  | C        | -1.68492600 | 0.14797000  | 3.06146600  |
| H         | 5.92740800  | -1.67365500 | -2.17179400 | H        | -1.46037700 | 0.96558400  | 3.76136500  |
| H         | 7.68072200  | -0.63315400 | -0.75260800 | H        | -2.72225100 | 0.33165100  | 2.74775900  |
| C         | -2.16681100 | -1.84159800 | -0.81263500 | C        | -1.60413200 | -1.18947200 | 3.81687900  |
| C         | -2.36093300 | -2.56069600 | -1.99590300 | H        | -2.27469300 | -1.22411700 | 4.68629300  |
| C         | -3.25382600 | -1.51189800 | -0.00008500 | H        | -1.86915000 | -2.03920100 | 3.17819200  |
| C         | -3.64733900 | -2.95043200 | -2.35662000 | H        | -0.59267300 | -1.38298100 | 4.18801200  |
| H         | -1.51938200 | -2.81989000 | -2.63032500 | N        | -1.20835600 | 2.01694100  | 0.24856900  |
| C         | -4.53279500 | -1.90838600 | -0.37210400 | C        | -0.60179900 | 2.44780700  | -0.84162700 |
| H         | -3.08160800 | -0.96001100 | 0.91533300  | C        | -2.30330400 | 2.83151400  | 0.42686200  |
| C         | -4.73693800 | -2.62839700 | -1.54934500 | H        | 0.31154900  | 2.03686300  | -1.24521300 |
| H         | -3.79539300 | -3.51191500 | -3.27341300 | C        | -2.34864800 | 3.76086700  | -0.57539600 |
| H         | -5.37443600 | -1.65721900 | 0.26509700  | H        | -2.97481300 | 2.69753100  | 1.26024400  |
| C         | -1.68492600 | 0.14797000  | 3.06146600  | H        | -3.03748900 | 4.56291400  | -0.78687400 |
| H         | -1.46037700 | 0.96558400  | 3.76136500  | C        | -0.88493500 | 4.22815500  | -2.59074300 |
| H         | -2.72225100 | 0.33165100  | 2.74775900  | H        | -0.70670800 | 5.28088500  | -2.36514600 |
| C         | -1.60413200 | -1.18947200 | 3.81687900  | H        | 0.03023100  | 3.79760100  | -2.99467800 |
| H         | -2.27469300 | -1.22411700 | 4.68629300  | H        | -1.67261700 | 4.14830900  | -3.34202500 |
| H         | -1.86915000 | -2.03920100 | 3.17819200  | N        | -1.25642300 | 3.50410200  | -1.38340900 |
| H         | -0.59267300 | -1.38298100 | 4.18801200  | <b>3</b> |             |             |             |
| N         | -1.20835600 | 2.01694100  | 0.24856900  | N        | 0.13344300  | -1.72222000 | -1.00234500 |
| C         | -0.60179900 | 2.44780700  | -0.84162700 | N        | 1.12712700  | -1.94918500 | -1.48919200 |
| C         | -2.30330400 | 2.83151400  | 0.42686200  | N        | -0.85739900 | -1.37067300 | -0.35335500 |
| H         | 0.31154900  | 2.03686300  | -1.24521300 | C        | 1.38420900  | 0.21886900  | 0.87841100  |
| C         | -2.34864800 | 3.76086700  | -0.57539600 | C        | 2.50029700  | -0.03298900 | 0.44503200  |
| H         | -2.97481300 | 2.69753100  | 1.26024400  | Zn       | -0.45267900 | 0.37338800  | 1.51957300  |
| H         | -3.03748900 | 4.56291400  | -0.78687400 | C        | 3.86980300  | -0.22280800 | 0.09248800  |
| C         | -0.88493500 | 4.22815500  | -2.59074300 | C        | 4.84581500  | 0.37630600  | 0.91036000  |
| H         | -0.70670800 | 5.28088500  | -2.36514600 | C        | 4.29639300  | -0.96658000 | -1.02314500 |
| H         | 0.03023100  | 3.79760100  | -2.99467800 | C        | 6.19689800  | 0.24792800  | 0.61951500  |
| H         | -1.67261700 | 4.14830900  | -3.34202500 | H        | 4.52115800  | 0.94451400  | 1.77478100  |
| N         | -1.25642300 | 3.50410200  | -1.38340900 | C        | 5.65379200  | -1.09281600 | -1.30807400 |
| H         | -5.73655900 | -2.93879600 | -1.83392500 | H        | 3.56117700  | -1.44182200 | -1.65977000 |
| <b>2a</b> |             |             |             | C        | 6.60892400  | -0.48567100 | -0.49346300 |
| N         | 0.09466300  | -1.75866300 | -1.02151400 | H        | 6.93245000  | 0.72055500  | 1.26330500  |
| N         | 1.07150500  | -2.00457100 | -1.53313200 | H        | 5.96742200  | -1.67021200 | -2.17258400 |
| N         | -0.89011100 | -1.40586800 | -0.36475300 | H        | 7.66538200  | -0.58598900 | -0.72138300 |
| C         | -2.16681100 | -1.84159800 | -0.81263500 | C        | -2.12997100 | -1.81452500 | -0.79846200 |
| C         | -2.36093300 | -2.56069600 | -1.99590300 | C        | -2.31988800 | -2.53589800 | -1.98049200 |
| C         | -3.25382600 | -1.51189800 | -0.00008500 | C        | -3.21703800 | -1.48956900 | 0.01550000  |
| C         | -3.64733900 | -2.95043200 | -2.35662000 | C        | -3.60410600 | -2.93426500 | -2.33827600 |
| H         | -1.51938200 | -2.81989000 | -2.63032500 | H        | -1.47679100 | -2.79003800 | -2.61490800 |
| C         | -4.53279500 | -1.90838600 | -0.37210400 | C        | -4.49369500 | -1.89435400 | -0.35383100 |
| H         | -3.08160800 | -0.96001100 | 0.91533300  | H        | -3.04673000 | -0.93610500 | 0.93024500  |
| C         | -4.73693800 | -2.62839700 | -1.54934500 | C        | -4.69430900 | -2.61763000 | -1.52956800 |
| H         | -3.79539300 | -3.51191500 | -3.27341300 | H        | -3.75053300 | -3.49816100 | -3.25383800 |
| H         | -5.37443600 | -1.65721900 | 0.26509700  | H        | -5.33615000 | -1.64769800 | 0.28402400  |
| H         | -5.73655900 | -2.93879600 | -1.83392500 | C        | -1.68324800 | 0.15102600  | 3.06984500  |
| <b>2b</b> |             |             |             | H        | -1.42601200 | 0.96670200  | 3.76082700  |
| C         | 1.40494400  | 0.23928500  | 0.88354000  | H        | -2.72589100 | 0.35053900  | 2.78476200  |
| C         | 2.54242400  | 0.02690800  | 0.49134900  | C        | -1.60311700 | -1.18508000 | 3.82773800  |
| Zn        | -0.42875400 | 0.39124600  | 1.53656400  | H        | -2.24563600 | -1.20413800 | 4.71856300  |
| C         | 3.91026800  | -0.16940700 | 0.13115800  | H        | -1.90504700 | -2.03178300 | 3.20139100  |
| C         | 4.91615600  | 0.40835300  | 0.92822200  | H        | -0.58398600 | -1.39678300 | 4.16659900  |
| C         | 4.29863600  | -0.92394900 | -0.99169300 | N        | -1.21309500 | 2.01373000  | 0.24339800  |

|           |             |             |             |           |             |             |             |
|-----------|-------------|-------------|-------------|-----------|-------------|-------------|-------------|
| C         | -0.61324900 | 2.43906700  | -0.85266800 | N         | 1.18783300  | -1.88414600 | -1.43041900 |
| C         | -2.29481200 | 2.84224500  | 0.43620900  | N         | -0.83272500 | -1.34471200 | -0.34719700 |
| H         | 0.29023800  | 2.01764000  | -1.26741800 | C         | 1.36971400  | 0.19998800  | 0.87439900  |
| C         | -2.33964200 | 3.77420300  | -0.56360200 | C         | 2.46070700  | -0.08712900 | 0.40239100  |
| H         | -2.95808800 | 2.71518100  | 1.27721600  | Zn        | -0.47026300 | 0.35894500  | 1.50525700  |
| H         | -3.02030000 | 4.58564800  | -0.76544400 | C         | 3.83222200  | -0.27202300 | 0.05445200  |
| C         | -0.89664700 | 4.22430100  | -2.59727600 | C         | 4.77855300  | 0.34680200  | 0.89175300  |
| H         | -0.70950700 | 5.27627600  | -2.37552800 | C         | 4.29522200  | -1.00503700 | -1.05353200 |
| H         | 0.01168400  | 3.78732900  | -3.00966200 | C         | 6.13622100  | 0.25352600  | 0.62695800  |
| H         | -1.69250000 | 4.14805200  | -3.34030500 | H         | 4.42205000  | 0.90512500  | 1.74984600  |
| N         | -1.26032000 | 3.50501400  | -1.38470900 | C         | 5.66131700  | -1.09681300 | -1.31198900 |
| H         | -5.69227600 | -2.93498900 | -1.81225000 | H         | 3.58616400  | -1.49621000 | -1.70645400 |
| <b>3a</b> |             |             |             | C         | 6.58589900  | -0.46700400 | -0.47987100 |
| N         | 0.13344300  | -1.72222000 | -1.00234500 | H         | 6.84746900  | 0.74322200  | 1.28513700  |
| N         | 1.12712700  | -1.94918500 | -1.48919200 | H         | 6.00574800  | -1.66454200 | -2.17121500 |
| N         | -0.85739900 | -1.37067300 | -0.35335500 | H         | 7.64841300  | -0.54006600 | -0.68929600 |
| C         | -2.12997100 | -1.81452500 | -0.79846200 | C         | -2.10137300 | -1.79471300 | -0.78848600 |
| C         | -2.31988800 | -2.53589800 | -1.98049200 | C         | -2.28954200 | -2.51800100 | -1.96920800 |
| C         | -3.21703800 | -1.48956900 | 0.01550000  | C         | -3.18769300 | -1.47244400 | 0.02733800  |
| C         | -3.60410600 | -2.93426500 | -2.33827600 | C         | -3.57263700 | -2.92178900 | -2.32363500 |
| H         | -1.47679100 | -2.79003800 | -2.61490800 | H         | -1.44541800 | -2.76873100 | -2.60368700 |
| C         | -4.49369500 | -1.89435400 | -0.35383100 | C         | -4.46317500 | -1.88218100 | -0.33890300 |
| H         | -3.04673000 | -0.93610500 | 0.93024500  | H         | -3.01794900 | -0.91799600 | 0.94158300  |
| C         | -4.69430900 | -2.61763000 | -1.52956800 | C         | -4.66253100 | -2.60783200 | -1.51326500 |
| H         | -3.75053300 | -3.49816100 | -3.25383800 | H         | -3.71905100 | -3.48766700 | -3.23796800 |
| H         | -5.33615000 | -1.64769800 | 0.28402400  | H         | -5.30549300 | -1.63802500 | 0.30007400  |
| H         | -5.69227600 | -2.93498900 | -1.81225000 | C         | -1.67806300 | 0.15474000  | 3.07651000  |
| <b>3b</b> |             |             |             | H         | -1.39190200 | 0.96676600  | 3.76046700  |
| C         | 1.38420900  | 0.21886900  | 0.87841100  | H         | -2.72384200 | 0.37013400  | 2.81551000  |
| C         | 2.50029700  | -0.03298900 | 0.44503200  | C         | -1.60111200 | -1.18162300 | 3.83419100  |
| Zn        | -0.45267900 | 0.37338800  | 1.51957300  | H         | -2.22195400 | -1.18943200 | 4.74043200  |
| C         | 3.86980300  | -0.22280800 | 0.09248800  | H         | -1.93202500 | -2.02403300 | 3.21669000  |
| C         | 4.84581500  | 0.37630600  | 0.91036000  | H         | -0.57759200 | -1.40955000 | 4.14846600  |
| C         | 4.29639300  | -0.96658000 | -1.02314500 | N         | -1.21163100 | 2.01293300  | 0.24116300  |
| C         | 6.19689800  | 0.24792800  | 0.61951500  | C         | -0.61716700 | 2.43544400  | -0.85890000 |
| H         | 4.52115800  | 0.94451400  | 1.77478100  | C         | -2.28680100 | 2.84756800  | 0.44266200  |
| C         | 5.65379200  | -1.09281600 | -1.30807400 | H         | 0.28058500  | 2.00895000  | -1.28082800 |
| H         | 3.56117700  | -1.44182200 | -1.65977000 | C         | -2.33383100 | 3.78016200  | -0.55638900 |
| C         | 6.60892400  | -0.48567100 | -0.49346300 | H         | -2.94433700 | 2.72363100  | 1.28860700  |
| H         | 6.93245000  | 0.72055500  | 1.26330500  | H         | -3.01129400 | 4.59560700  | -0.75274800 |
| H         | 5.96742200  | -1.67021200 | -2.17258400 | C         | -0.90537300 | 4.22194500  | -2.60177000 |
| H         | 7.66538200  | -0.58598900 | -0.72138300 | H         | -0.71325200 | 5.27358900  | -2.38278800 |
| C         | -1.68324800 | 0.15102600  | 3.06984500  | H         | -0.00158700 | 3.78161000  | -3.02050800 |
| H         | -1.42601200 | 0.96670200  | 3.76082700  | H         | -1.70712500 | 4.14730600  | -3.33861300 |
| H         | -2.72589100 | 0.35053900  | 2.78476200  | N         | -1.26218600 | 3.50534000  | -1.38558500 |
| C         | -1.60311700 | -1.18508000 | 3.82773800  | H         | -5.65969300 | -2.92948400 | -1.79385600 |
| H         | -2.24563600 | -1.20413800 | 4.71856300  | <b>4a</b> |             |             |             |
| H         | -1.90504700 | -2.03178300 | 3.20139100  | N         | 0.16576600  | -1.69324000 | -0.98682100 |
| H         | -0.58398600 | -1.39678300 | 4.16659900  | N         | 1.18783300  | -1.88414600 | -1.43041900 |
| N         | -1.21309500 | 2.01373000  | 0.24339800  | N         | -0.83272500 | -1.34471200 | -0.34719700 |
| C         | -0.61324900 | 2.43906700  | -0.85266800 | C         | -2.10137300 | -1.79471300 | -0.78848600 |
| C         | -2.29481200 | 2.84224500  | 0.43620900  | C         | -2.28954200 | -2.51800100 | -1.96920800 |
| H         | 0.29023800  | 2.01764000  | -1.26741800 | C         | -3.18769300 | -1.47244400 | 0.02733800  |
| C         | -2.33964200 | 3.77420300  | -0.56360200 | C         | -3.57263700 | -2.92178900 | -2.32363500 |
| H         | -2.95808800 | 2.71518100  | 1.27721600  | H         | -1.44541800 | -2.76873100 | -2.60368700 |
| H         | -3.02030000 | 4.58564800  | -0.76544400 | C         | -4.46317500 | -1.88218100 | -0.33890300 |
| C         | -0.89664700 | 4.22430100  | -2.59727600 | H         | -3.01794900 | -0.91799600 | 0.94158300  |
| H         | -0.70950700 | 5.27627600  | -2.37552800 | C         | -4.66253100 | -2.60783200 | -1.51326500 |
| H         | 0.01168400  | 3.78732900  | -3.00966200 | H         | -3.71905100 | -3.48766700 | -3.23796800 |
| H         | -1.69250000 | 4.14805200  | -3.34030500 | H         | -5.30549300 | -1.63802500 | 0.30007400  |
| N         | -1.26032000 | 3.50501400  | -1.38470900 | H         | -5.65969300 | -2.92948400 | -1.79385600 |
| <b>4</b>  |             |             |             | <b>4b</b> |             |             |             |
| N         | 0.16576600  | -1.69324000 | -0.98682100 | C         | 1.36971400  | 0.19998800  | 0.87439900  |

|    |             |             |             |
|----|-------------|-------------|-------------|
| C  | 2.46070700  | -0.08712900 | 0.40239100  |
| Zn | -0.47026300 | 0.35894500  | 1.50525700  |
| C  | 3.83222200  | -0.27202300 | 0.05445200  |
| C  | 4.77855300  | 0.34680200  | 0.89175300  |
| C  | 4.29522200  | -1.00503700 | -1.05353200 |
| C  | 6.13622100  | 0.25352600  | 0.62695800  |
| H  | 4.42205000  | 0.90512500  | 1.74984600  |
| C  | 5.66131700  | -1.09681300 | -1.31198900 |
| H  | 3.58616400  | -1.49621000 | -1.70645400 |
| C  | 6.58589900  | -0.46700400 | -0.47987100 |
| H  | 6.84746900  | 0.74322200  | 1.28513700  |
| H  | 6.00574800  | -1.66454200 | -2.17121500 |
| H  | 7.64841300  | -0.54006600 | -0.68929600 |
| C  | -1.67806300 | 0.15474000  | 3.07651000  |
| H  | -1.39190200 | 0.96676600  | 3.76046700  |
| H  | -2.72384200 | 0.37013400  | 2.81551000  |
| C  | -1.60111200 | -1.18162300 | 3.83419100  |
| H  | -2.22195400 | -1.18943200 | 4.74043200  |
| H  | -1.93202500 | -2.02403300 | 3.21669000  |
| H  | -0.57759200 | -1.40955000 | 4.14846600  |
| N  | -1.21163100 | 2.01293300  | 0.24116300  |
| C  | -0.61716700 | 2.43544400  | -0.85890000 |
| C  | -2.28680100 | 2.84756800  | 0.44266200  |
| H  | 0.28058500  | 2.00895000  | -1.28082800 |
| C  | -2.33383100 | 3.78016200  | -0.55638900 |
| H  | -2.94433700 | 2.72363100  | 1.28860700  |
| H  | -3.01129400 | 4.59560700  | -0.75274800 |
| C  | -0.90537300 | 4.22194500  | -2.60177000 |
| H  | -0.71325200 | 5.27358900  | -2.38278800 |
| H  | -0.00158700 | 3.78161000  | -3.02050800 |
| H  | -1.70712500 | 4.14730600  | -3.33861300 |
| N  | -1.26218600 | 3.50534000  | -1.38558500 |

**5**

|    |             |             |             |
|----|-------------|-------------|-------------|
| N  | 0.19519100  | -1.67300500 | -0.97864800 |
| N  | 1.25304000  | -1.80598000 | -1.35465400 |
| N  | -0.81088000 | -1.32378700 | -0.34487200 |
| C  | 1.35818400  | 0.18159200  | 0.87123600  |
| C  | 2.42217600  | -0.14188800 | 0.35866200  |
| Zn | -0.48495900 | 0.34615300  | 1.49207300  |
| C  | 3.79611900  | -0.31932200 | 0.01592900  |
| C  | 4.71205000  | 0.31883600  | 0.87165900  |
| C  | 4.29422700  | -1.04098600 | -1.08377300 |
| C  | 6.07491500  | 0.25857300  | 0.63328900  |
| H  | 4.32494300  | 0.86734000  | 1.72254000  |
| C  | 5.66736600  | -1.10001200 | -1.31527900 |
| H  | 3.61160700  | -1.54701100 | -1.75223400 |
| C  | 6.56110400  | -0.44973500 | -0.46586100 |
| H  | 6.76171700  | 0.76414400  | 1.30529900  |
| H  | 6.04154700  | -1.65814200 | -2.16832200 |
| H  | 7.62870700  | -0.49753800 | -0.65588200 |
| C  | -2.07620100 | -1.77818800 | -0.77975100 |
| C  | -2.26392400 | -2.50312300 | -1.95929200 |
| C  | -3.16155100 | -1.45764500 | 0.03792700  |
| C  | -3.54591900 | -2.91081100 | -2.31077200 |
| H  | -1.41866700 | -2.75089300 | -2.59343300 |
| C  | -4.43628000 | -1.87078600 | -0.32569500 |
| H  | -2.99236700 | -0.90259300 | 0.95189600  |
| C  | -4.63525800 | -2.59823200 | -1.49884500 |
| H  | -3.69281200 | -3.47835600 | -3.22404600 |
| H  | -5.27833800 | -1.62831100 | 0.31428500  |
| C  | -1.67030100 | 0.15952000  | 3.08300300  |
| H  | -1.35798800 | 0.96645200  | 3.76148200  |
| H  | -2.71757500 | 0.39081600  | 2.84246700  |

|   |             |             |             |
|---|-------------|-------------|-------------|
| C | -1.59878900 | -1.17852400 | 3.83805100  |
| H | -2.20642900 | -1.17997500 | 4.75323900  |
| H | -1.94893100 | -2.01618800 | 3.22467700  |
| H | -0.57363400 | -1.41921900 | 4.13717300  |
| N | -1.20758900 | 2.01348100  | 0.24070700  |
| C | -0.61813900 | 2.43389800  | -0.86280900 |
| C | -2.27934200 | 2.85084100  | 0.44802900  |
| H | 0.27542900  | 2.00435800  | -1.29042100 |
| C | -2.32995100 | 3.78276900  | -0.55141000 |
| H | -2.93233900 | 2.72858700  | 1.29770500  |
| H | -3.00666700 | 4.59960700  | -0.74449900 |
| C | -0.91215400 | 4.22023300  | -2.60496800 |
| H | -0.71670800 | 5.27161000  | -2.38765200 |
| H | -0.01162500 | 3.77784400  | -3.02853500 |
| H | -1.71817900 | 4.14679400  | -3.33724500 |
| N | -1.26361400 | 3.50502100  | -1.38641500 |
| H | -5.63204800 | -2.92275500 | -1.77752900 |

**5a**

|   |             |             |             |
|---|-------------|-------------|-------------|
| N | 0.19519100  | -1.67300500 | -0.97864800 |
| N | 1.25304000  | -1.80598000 | -1.35465400 |
| N | -0.81088000 | -1.32378700 | -0.34487200 |
| C | -2.07620100 | -1.77818800 | -0.77975100 |
| C | -2.26392400 | -2.50312300 | -1.95929200 |
| C | -3.16155100 | -1.45764500 | 0.03792700  |
| C | -3.54591900 | -2.91081100 | -2.31077200 |
| H | -1.41866700 | -2.75089300 | -2.59343300 |
| C | -4.43628000 | -1.87078600 | -0.32569500 |
| H | -2.99236700 | -0.90259300 | 0.95189600  |
| C | -4.63525800 | -2.59823200 | -1.49884500 |
| H | -3.69281200 | -3.47835600 | -3.22404600 |
| H | -5.27833800 | -1.62831100 | 0.31428500  |
| H | -5.63204800 | -2.92275500 | -1.77752900 |

**5b**

|    |             |             |             |
|----|-------------|-------------|-------------|
| C  | 1.35818400  | 0.18159200  | 0.87123600  |
| C  | 2.42217600  | -0.14188800 | 0.35866200  |
| Zn | -0.48495900 | 0.34615300  | 1.49207300  |
| C  | 3.79611900  | -0.31932200 | 0.01592900  |
| C  | 4.71205000  | 0.31883600  | 0.87165900  |
| C  | 4.29422700  | -1.04098600 | -1.08377300 |
| C  | 6.07491500  | 0.25857300  | 0.63328900  |
| H  | 4.32494300  | 0.86734000  | 1.72254000  |
| C  | 5.66736600  | -1.10001200 | -1.31527900 |
| H  | 3.61160700  | -1.54701100 | -1.75223400 |
| C  | 6.56110400  | -0.44973500 | -0.46586100 |
| H  | 6.76171700  | 0.76414400  | 1.30529900  |
| H  | 6.04154700  | -1.65814200 | -2.16832200 |
| H  | 7.62870700  | -0.49753800 | -0.65588200 |
| C  | -1.67030100 | 0.15952000  | 3.08300300  |
| H  | -1.35798800 | 0.96645200  | 3.76148200  |
| H  | -2.71757500 | 0.39081600  | 2.84246700  |
| C  | -1.59878900 | -1.17852400 | 3.83805100  |
| H  | -2.20642900 | -1.17997500 | 4.75323900  |
| H  | -1.94893100 | -2.01618800 | 3.22467700  |
| H  | -0.57363400 | -1.41921900 | 4.13717300  |
| N  | -1.20758900 | 2.01348100  | 0.24070700  |
| C  | -0.61813900 | 2.43389800  | -0.86280900 |
| C  | -2.27934200 | 2.85084100  | 0.44802900  |
| H  | 0.27542900  | 2.00435800  | -1.29042100 |
| C  | -2.32995100 | 3.78276900  | -0.55141000 |
| H  | -2.93233900 | 2.72858700  | 1.29770500  |
| H  | -3.00666700 | 4.59960700  | -0.74449900 |
| C  | -0.91215400 | 4.22023300  | -2.60496800 |
| H  | -0.71670800 | 5.27161000  | -2.38765200 |



|           |             |             |             |
|-----------|-------------|-------------|-------------|
| H         | -0.01162500 | 3.77784400  | -3.02853500 |
| H         | -1.71817900 | 4.14679400  | -3.33724500 |
| N         | -1.26361400 | 3.50502100  | -1.38641500 |
| <b>6</b>  |             |             |             |
| N         | 0.21653400  | -1.66632100 | -0.98187300 |
| N         | 1.31112800  | -1.72779200 | -1.27540200 |
| N         | -0.79046300 | -1.30703800 | -0.34422800 |
| C         | 1.34896300  | 0.16319900  | 0.86525100  |
| C         | 2.38712200  | -0.19414900 | 0.31604600  |
| Zn        | -0.49653000 | 0.33651500  | 1.48198300  |
| C         | 3.76597600  | -0.35836900 | -0.01725000 |
| C         | 4.65467200  | 0.29651300  | 0.85372700  |
| C         | 4.29269200  | -1.06973900 | -1.10932200 |
| C         | 6.02121500  | 0.26213400  | 0.63806700  |
| H         | 4.24249600  | 0.83664100  | 1.69795700  |
| C         | 5.67044000  | -1.10225200 | -1.31787900 |
| H         | 3.63189800  | -1.58807200 | -1.78951300 |
| C         | 6.53758300  | -0.43652700 | -0.45343700 |
| H         | 6.68729700  | 0.77982400  | 1.32146500  |
| H         | 6.06922800  | -1.65224200 | -2.16500100 |
| H         | 7.60880300  | -0.46459900 | -0.62594000 |
| C         | -2.05385000 | -1.76414200 | -0.77105000 |
| C         | -2.24223200 | -2.49055300 | -1.94983800 |
| C         | -3.13959800 | -1.44565100 | 0.04699400  |
| C         | -3.52272400 | -2.90135400 | -2.30001000 |
| H         | -1.39572400 | -2.73571600 | -2.58323100 |
| C         | -4.41372300 | -1.86144500 | -0.31552600 |
| H         | -2.97257800 | -0.89034500 | 0.96126000  |
| C         | -4.61242800 | -2.59001900 | -1.48779200 |
| H         | -3.66904900 | -3.47007600 | -3.21269100 |
| H         | -5.25572700 | -1.62025100 | 0.32507100  |
| C         | -1.66221900 | 0.16456600  | 3.08929100  |
| H         | -1.33208700 | 0.96641600  | 3.76520500  |
| H         | -2.70960300 | 0.40788600  | 2.86167400  |
| C         | -1.59681400 | -1.17619200 | 3.83995400  |
| H         | -2.20012000 | -1.17602900 | 4.75800900  |
| H         | -1.95575500 | -2.00953200 | 3.22585300  |
| H         | -0.57196100 | -1.42494200 | 4.13359300  |
| N         | -1.20311200 | 2.01468300  | 0.24123600  |
| C         | -0.61802100 | 2.43344300  | -0.86518900 |
| C         | -2.27348400 | 2.85284000  | 0.45209300  |
| H         | 0.27196000  | 2.00156900  | -1.29779000 |
| C         | -2.32778200 | 3.78352800  | -0.54826600 |
| H         | -2.92328400 | 2.73136800  | 1.30429700  |
| H         | -3.00510100 | 4.60024000  | -0.73968500 |
| C         | -0.91671700 | 4.21915100  | -2.60697400 |
| H         | -0.71923600 | 5.27030200  | -2.39040200 |
| H         | -0.01823600 | 3.77556900  | -3.03362500 |
| H         | -1.72532800 | 4.14662200  | -3.33647200 |
| N         | -1.26484400 | 3.50447600  | -1.38714800 |
| H         | -5.60881400 | -2.91653100 | -1.76551600 |
| <b>6a</b> |             |             |             |
| N         | 0.21653400  | -1.66632100 | -0.98187300 |
| N         | 1.31112800  | -1.72779200 | -1.27540200 |
| N         | -0.79046300 | -1.30703800 | -0.34422800 |
| C         | -2.05385000 | -1.76414200 | -0.77105000 |
| C         | -2.24223200 | -2.49055300 | -1.94983800 |
| C         | -3.13959800 | -1.44565100 | 0.04699400  |
| C         | -3.52272400 | -2.90135400 | -2.30001000 |
| H         | -1.39572400 | -2.73571600 | -2.58323100 |
| C         | -4.41372300 | -1.86144500 | -0.31552600 |
| H         | -2.97257800 | -0.89034500 | 0.96126000  |
| C         | -4.61242800 | -2.59001900 | -1.48779200 |

|           |             |             |             |
|-----------|-------------|-------------|-------------|
| H         | -3.66904900 | -3.47007600 | -3.21269100 |
| H         | -5.25572700 | -1.62025100 | 0.32507100  |
| H         | -5.60881400 | -2.91653100 | -1.76551600 |
| <b>6b</b> |             |             |             |
| C         | 1.34896300  | 0.16319900  | 0.86525100  |
| C         | 2.38712200  | -0.19414900 | 0.31604600  |
| Zn        | -0.49653000 | 0.33651500  | 1.48198300  |
| C         | 3.76597600  | -0.35836900 | -0.01725000 |
| C         | 4.65467200  | 0.29651300  | 0.85372700  |
| C         | 4.29269200  | -1.06973900 | -1.10932200 |
| C         | 6.02121500  | 0.26213400  | 0.63806700  |
| H         | 4.24249600  | 0.83664100  | 1.69795700  |
| C         | 5.67044000  | -1.10225200 | -1.31787900 |
| H         | 3.63189800  | -1.58807200 | -1.78951300 |
| C         | 6.53758300  | -0.43652700 | -0.45343700 |
| H         | 6.68729700  | 0.77982400  | 1.32146500  |
| H         | 6.06922800  | -1.65224200 | -2.16500100 |
| H         | 7.60880300  | -0.46459900 | -0.62594000 |
| C         | -1.66221900 | 0.16456600  | 3.08929100  |
| H         | -1.33208700 | 0.96641600  | 3.76520500  |
| H         | -2.70960300 | 0.40788600  | 2.86167400  |
| C         | -1.59681400 | -1.17619200 | 3.83995400  |
| H         | -2.20012000 | -1.17602900 | 4.75800900  |
| H         | -1.95575500 | -2.00953200 | 3.22585300  |
| H         | -0.57196100 | -1.42494200 | 4.13359300  |
| N         | -1.20311200 | 2.01468300  | 0.24123600  |
| C         | -0.61802100 | 2.43344300  | -0.86518900 |
| C         | -2.27348400 | 2.85284000  | 0.45209300  |
| H         | 0.27196000  | 2.00156900  | -1.29779000 |
| C         | -2.32778200 | 3.78352800  | -0.54826600 |
| H         | -2.92328400 | 2.73136800  | 1.30429700  |
| H         | -3.00510100 | 4.60024000  | -0.73968500 |
| C         | -0.91671700 | 4.21915100  | -2.60697400 |
| H         | -0.71923600 | 5.27030200  | -2.39040200 |
| H         | -0.01823600 | 3.77556900  | -3.03362500 |
| H         | -1.72532800 | 4.14662200  | -3.33647200 |
| N         | -1.26484400 | 3.50447600  | -1.38714800 |
| <b>7</b>  |             |             |             |
| N         | 0.22520000  | -1.66647000 | -0.98621400 |
| N         | 1.33575700  | -1.69208400 | -1.23845200 |
| N         | -0.78017300 | -1.29921300 | -0.34330500 |
| C         | 1.34525700  | 0.15458700  | 0.86160000  |
| C         | 2.37056900  | -0.21968400 | 0.29472200  |
| Zn        | -0.50126900 | 0.33284800  | 1.47815200  |
| C         | 3.75315800  | -0.37447600 | -0.03123500 |
| C         | 4.62986200  | 0.28757100  | 0.84609700  |
| C         | 4.29152300  | -1.08117800 | -1.11992300 |
| C         | 5.99789500  | 0.26335900  | 0.63994900  |
| H         | 4.20749200  | 0.82411600  | 1.68751100  |
| C         | 5.67080600  | -1.10303000 | -1.31893500 |
| H         | 3.63949200  | -1.60456600 | -1.80452400 |
| C         | 6.52674000  | -0.43146100 | -0.44805300 |
| H         | 6.65525800  | 0.78573400  | 1.32809800  |
| H         | 6.07963100  | -1.64957900 | -2.16344200 |
| H         | 7.59930500  | -0.45174700 | -0.61284800 |
| C         | -2.04329500 | -1.75779600 | -0.76674500 |
| C         | -2.23260800 | -2.48500400 | -1.94534000 |
| C         | -3.13000100 | -1.44072100 | 0.05075200  |
| C         | -3.51241200 | -2.89715900 | -2.29533600 |
| H         | -1.38561400 | -2.72913400 | -2.57835200 |
| C         | -4.40396700 | -1.85762700 | -0.31157400 |
| H         | -2.96471100 | -0.88538000 | 0.96533800  |
| C         | -4.60270800 | -2.58655300 | -1.48347000 |

|           |             |             |             |           |             |             |             |
|-----------|-------------|-------------|-------------|-----------|-------------|-------------|-------------|
| H         | -3.65797300 | -3.46631400 | -3.20791200 | C         | -2.32713100 | 3.78358900  | -0.54717000 |
| H         | -5.24588100 | -1.61688700 | 0.32936500  | H         | -2.91982000 | 2.73222000  | 1.30676800  |
| C         | -1.65857000 | 0.16688500  | 3.09216000  | H         | -3.00499300 | 4.59995000  | -0.73812400 |
| H         | -1.32297600 | 0.96658100  | 3.76782200  | C         | -0.91832400 | 4.21878400  | -2.60766600 |
| H         | -2.70572800 | 0.41433600  | 2.86812200  | H         | -0.72016700 | 5.26984600  | -2.39128000 |
| C         | -1.59602100 | -1.17531900 | 3.84047700  | H         | -0.02052800 | 3.77478500  | -3.03532400 |
| H         | -2.19919300 | -1.17533200 | 4.75861300  | H         | -1.72774800 | 4.14657600  | -3.33627600 |
| H         | -1.95685600 | -2.00677600 | 3.22500500  | N         | -1.26538300 | 3.50424300  | -1.38744900 |
| H         | -0.57166600 | -1.42679100 | 4.13361000  | <b>8</b>  |             |             |             |
| N         | -1.20105300 | 2.01534200  | 0.24163200  | N         | 0.23921600  | -1.66921500 | -0.99527500 |
| C         | -0.61787200 | 2.43343100  | -0.86604100 | N         | 1.37061200  | -1.63840100 | -1.18206100 |
| C         | -2.27118800 | 2.85352400  | 0.45367000  | N         | -0.76280500 | -1.28705700 | -0.34104000 |
| H         | 0.27036300  | 2.00049000  | -1.30107700 | C         | 1.34032700  | 0.14179800  | 0.85554900  |
| C         | -2.32713100 | 3.78358900  | -0.54717000 | C         | 2.34342500  | -0.26152300 | 0.25904100  |
| H         | -2.91982000 | 2.73222000  | 1.30676800  | Zn        | -0.50777400 | 0.32815100  | 1.47328200  |
| H         | -3.00499300 | 4.59995000  | -0.73812400 | C         | 3.73425900  | -0.39694800 | -0.05094200 |
| C         | -0.91832400 | 4.21878400  | -2.60766600 | C         | 4.59356000  | 0.27539800  | 0.83530600  |
| H         | -0.72016700 | 5.26984600  | -2.39128000 | C         | 4.28909400  | -1.09649500 | -1.13450800 |
| H         | -0.02052800 | 3.77478500  | -3.03532400 | C         | 5.96388700  | 0.26476200  | 0.64246100  |
| H         | -1.72774800 | 4.14657600  | -3.33627600 | H         | 4.15792400  | 0.80702900  | 1.67309500  |
| N         | -1.26538300 | 3.50424300  | -1.38744900 | C         | 5.67020200  | -1.10392400 | -1.32029700 |
| H         | -5.59888600 | -2.91383800 | -1.76102600 | H         | 3.64844700  | -1.62645700 | -1.82474400 |
| <b>7a</b> |             |             |             | C         | 6.51039100  | -0.42477800 | -0.44027800 |
| N         | 0.22520000  | -1.66647000 | -0.98621400 | H         | 6.60923900  | 0.79320300  | 1.33722000  |
| N         | 1.33575700  | -1.69208400 | -1.23845200 | H         | 6.09261400  | -1.64567200 | -2.16110200 |
| N         | -0.78017300 | -1.29921300 | -0.34330500 | H         | 7.58472400  | -0.43471000 | -0.59396000 |
| C         | -2.04329500 | -1.75779600 | -0.76674500 | C         | -2.02653700 | -1.74822300 | -0.76000700 |
| C         | -2.23260800 | -2.48500400 | -1.94534000 | C         | -2.21842800 | -2.47690000 | -1.93848500 |
| C         | -3.13000100 | -1.44072100 | 0.05075200  | C         | -3.11591600 | -1.43396400 | 0.05580100  |
| C         | -3.51241200 | -2.89715900 | -2.29533600 | C         | -3.49741500 | -2.89097700 | -2.28849300 |
| H         | -1.38561400 | -2.72913400 | -2.57835200 | H         | -1.37114800 | -2.71997600 | -2.57114300 |
| C         | -4.40396700 | -1.85762700 | -0.31157400 | C         | -4.38992000 | -1.85241300 | -0.30637000 |
| H         | -2.96471100 | -0.88538000 | 0.96533800  | H         | -2.95422000 | -0.87864400 | 0.97107500  |
| C         | -4.60270800 | -2.58655300 | -1.48347000 | C         | -4.58909800 | -2.58171800 | -1.47769500 |
| H         | -3.65797300 | -3.46631400 | -3.20791200 | H         | -3.64146500 | -3.46066200 | -3.20110200 |
| H         | -5.24588100 | -1.61688700 | 0.32936500  | H         | -5.23159900 | -1.61216800 | 0.33520900  |
| H         | -5.59888600 | -2.91383800 | -1.76102600 | C         | -1.65323500 | 0.17029300  | 3.09639800  |
| <b>7b</b> |             |             |             | H         | -1.31244100 | 0.96709200  | 3.77264900  |
| C         | 1.34525700  | 0.15458700  | 0.86160000  | H         | -2.69985500 | 0.42232800  | 2.87517400  |
| C         | 2.37056900  | -0.21968400 | 0.29472200  | C         | -1.59495800 | -1.17420700 | 3.84100500  |
| Zn        | -0.50126900 | 0.33284800  | 1.47815200  | H         | -2.19916300 | -1.17501400 | 4.75844200  |
| C         | 3.75315800  | -0.37447600 | -0.03123500 | H         | -1.95719600 | -2.00292900 | 3.22282400  |
| C         | 4.62986200  | 0.28757100  | 0.84609700  | H         | -0.57158500 | -1.42908900 | 4.13475100  |
| C         | 4.29152300  | -1.08117800 | -1.11992300 | N         | -1.19804900 | 2.01639800  | 0.24233200  |
| C         | 5.99789500  | 0.26335900  | 0.63994900  | C         | -0.61765500 | 2.43356200  | -0.86714400 |
| H         | 4.20749200  | 0.82411600  | 1.68751100  | C         | -2.26815000 | 2.85437900  | 0.45575800  |
| C         | 5.67080600  | -1.10303000 | -1.31893500 | H         | 0.26779600  | 1.99902500  | -1.30607600 |
| H         | 3.63949200  | -1.60456600 | -1.80452400 | C         | -2.32642600 | 3.78351000  | -0.54581100 |
| C         | 6.52674000  | -0.43146100 | -0.44805300 | H         | -2.91538300 | 2.73316700  | 1.30990300  |
| H         | 6.65525800  | 0.78573400  | 1.32809800  | H         | -3.00528600 | 4.59912600  | -0.73633000 |
| H         | 6.07963100  | -1.64957900 | -2.16344200 | C         | -0.92029600 | 4.21834000  | -2.60852100 |
| H         | 7.59930500  | -0.45174700 | -0.61284800 | H         | -0.72130400 | 5.26928500  | -2.39231000 |
| C         | -1.65857000 | 0.16688500  | 3.09216000  | H         | -0.02332100 | 3.77379600  | -3.03734000 |
| H         | -1.32297600 | 0.96658100  | 3.76782200  | H         | -1.73062500 | 4.14653100  | -3.33612600 |
| H         | -2.70572800 | 0.41433600  | 2.86812200  | N         | -1.26615700 | 3.50395600  | -1.38785500 |
| C         | -1.59602100 | -1.17531900 | 3.84047700  | H         | -5.58498500 | -2.91001600 | -1.75525400 |
| H         | -2.19919300 | -1.17533200 | 4.75861300  | <b>8a</b> |             |             |             |
| H         | -1.95685600 | -2.00677600 | 3.22500500  | N         | 0.23921600  | -1.66921500 | -0.99527500 |
| H         | -0.57166600 | -1.42679100 | 4.13361000  | N         | 1.37061200  | -1.63840100 | -1.18206100 |
| N         | -1.20105300 | 2.01534200  | 0.24163200  | N         | -0.76280500 | -1.28705700 | -0.34104000 |
| C         | -0.61787200 | 2.43343100  | -0.86604100 | C         | -2.02653700 | -1.74822300 | -0.76000700 |
| C         | -2.27118800 | 2.85352400  | 0.45367000  | C         | -2.21842800 | -2.47690000 | -1.93848500 |
| H         | 0.27036300  | 2.00049000  | -1.30107700 | C         | -3.11591600 | -1.43396400 | 0.05580100  |

|   |             |             |             |
|---|-------------|-------------|-------------|
| C | -3.49741500 | -2.89097700 | -2.28849300 |
| H | -1.37114800 | -2.71997600 | -2.57114300 |
| C | -4.38992000 | -1.85241300 | -0.30637000 |
| H | -2.95422000 | -0.87864400 | 0.97107500  |
| C | -4.58909800 | -2.58171800 | -1.47769500 |
| H | -3.64146500 | -3.46066200 | -3.20110200 |
| H | -5.23159900 | -1.61216800 | 0.33520900  |
| H | -5.58498500 | -2.91001600 | -1.75525400 |

**8b**

|    |             |             |             |
|----|-------------|-------------|-------------|
| C  | 1.34032700  | 0.14179800  | 0.85554900  |
| C  | 2.34342500  | -0.26152300 | 0.25904100  |
| Zn | -0.50777400 | 0.32815100  | 1.47328200  |
| C  | 3.73425900  | -0.39694800 | -0.05094200 |
| C  | 4.59356000  | 0.27539800  | 0.83530600  |
| C  | 4.28909400  | -1.09649500 | -1.13450800 |
| C  | 5.96388700  | 0.26476200  | 0.64246100  |
| H  | 4.15792400  | 0.80702900  | 1.67309500  |
| C  | 5.67020200  | -1.10392400 | -1.32029700 |
| H  | 3.64844700  | -1.62645700 | -1.82474400 |
| C  | 6.51039100  | -0.42477800 | -0.44027800 |
| H  | 6.60923900  | 0.79320300  | 1.33722000  |
| H  | 6.09261400  | -1.64567200 | -2.16110200 |
| H  | 7.58472400  | -0.43471000 | -0.59396000 |
| C  | -1.65323500 | 0.17029300  | 3.09639800  |
| H  | -1.31244100 | 0.96709200  | 3.77264900  |
| H  | -2.69985500 | 0.42232800  | 2.87517400  |
| C  | -1.59495800 | -1.17420700 | 3.84100500  |
| H  | -2.19916300 | -1.17501400 | 4.75844200  |
| H  | -1.95719600 | -2.00292900 | 3.22282400  |
| H  | -0.57158500 | -1.42908900 | 4.13475100  |
| N  | -1.19804900 | 2.01639800  | 0.24233200  |
| C  | -0.61765500 | 2.43356200  | -0.86714400 |
| C  | -2.26815000 | 2.85437900  | 0.45575800  |
| H  | 0.26779600  | 1.99902500  | -1.30607600 |
| C  | -2.32642600 | 3.78351000  | -0.54581100 |
| H  | -2.91538300 | 2.73316700  | 1.30990300  |
| H  | -3.00528600 | 4.59912600  | -0.73633000 |
| C  | -0.92029600 | 4.21834000  | -2.60852100 |
| H  | -0.72130400 | 5.26928500  | -2.39231000 |
| H  | -0.02332100 | 3.77379600  | -3.03734000 |
| H  | -1.73062500 | 4.14653100  | -3.33612600 |
| N  | -1.26615700 | 3.50395600  | -1.38785500 |

**9**

|    |             |             |             |
|----|-------------|-------------|-------------|
| N  | 0.25480400  | -1.67281800 | -1.00508300 |
| N  | 1.40433400  | -1.58555500 | -1.12582100 |
| N  | -0.74314300 | -1.27456000 | -0.33767100 |
| C  | 1.33658500  | 0.12968600  | 0.84903200  |
| C  | 2.31178100  | -0.30902700 | 0.21720500  |
| Zn | -0.51335700 | 0.32445300  | 1.46950200  |
| C  | 3.71544100  | -0.41693000 | -0.06858000 |
| C  | 4.55891600  | 0.26483100  | 0.82555700  |
| C  | 4.28600800  | -1.10925900 | -1.14688100 |
| C  | 5.93187200  | 0.26558700  | 0.64452100  |
| H  | 4.11272000  | 0.79222400  | 1.66064500  |
| C  | 5.66849300  | -1.10445300 | -1.32122600 |
| H  | 3.65458800  | -1.64479000 | -1.84154100 |
| C  | 6.49475700  | -0.41911900 | -0.43312300 |
| H  | 6.56635100  | 0.79900900  | 1.34537600  |
| H  | 6.10233700  | -1.64204600 | -2.15875100 |
| H  | 7.57054600  | -0.42019400 | -0.57643600 |
| C  | -2.00933500 | -1.73884500 | -0.75321600 |
| C  | -2.20507800 | -2.46938000 | -1.93177400 |
| C  | -3.10272900 | -1.42813200 | 0.06001500  |

|   |             |             |             |
|---|-------------|-------------|-------------|
| C | -3.48366000 | -2.88512000 | -2.28205400 |
| H | -1.35800800 | -2.71189800 | -2.56430600 |
| C | -4.37719000 | -1.84795400 | -0.30207200 |
| H | -2.94553000 | -0.87273500 | 0.97609100  |
| C | -4.57720800 | -2.57747800 | -1.47281500 |
| H | -3.62579400 | -3.45512200 | -3.19492700 |
| H | -5.21845100 | -1.60789700 | 0.34032100  |
| C | -1.64831600 | 0.17343900  | 3.10035400  |
| H | -1.30554900 | 0.96779800  | 3.77822900  |
| H | -2.69425200 | 0.42831100  | 2.87935100  |
| C | -1.59407600 | -1.17334800 | 3.84130000  |
| H | -2.20008400 | -1.17522900 | 4.75751200  |
| H | -1.95664600 | -1.99953000 | 3.22010600  |
| H | -0.57179600 | -1.43100900 | 4.13658900  |
| N | -1.19530500 | 2.01746200  | 0.24309700  |
| C | -0.61749900 | 2.43379700  | -0.86804900 |
| C | -2.26567200 | 2.85506200  | 0.45747400  |
| H | 0.26506400  | 1.99773300  | -1.31104800 |
| C | -2.32597000 | 3.78333000  | -0.54478200 |
| H | -2.91186200 | 2.73385900  | 1.31237900  |
| H | -3.00592200 | 4.59806200  | -0.73511700 |
| C | -0.92178100 | 4.21800800  | -2.60919200 |
| H | -0.72213900 | 5.26885000  | -2.39306700 |
| H | -0.02544600 | 3.77297900  | -3.03884800 |
| H | -1.73273500 | 4.14649700  | -3.33608200 |
| N | -1.26683400 | 3.50375600  | -1.38818500 |
| H | -5.57282400 | -2.90661000 | -1.75059600 |

**9a**

|   |             |             |             |
|---|-------------|-------------|-------------|
| N | 0.25480400  | -1.67281800 | -1.00508300 |
| N | 1.40433400  | -1.58555500 | -1.12582100 |
| N | -0.74314300 | -1.27456000 | -0.33767100 |
| C | -2.00933500 | -1.73884500 | -0.75321600 |
| C | -2.20507800 | -2.46938000 | -1.93177400 |
| C | -3.10272900 | -1.42813200 | 0.06001500  |
| C | -3.48366000 | -2.88512000 | -2.28205400 |
| H | -1.35800800 | -2.71189800 | -2.56430600 |
| C | -4.37719000 | -1.84795400 | -0.30207200 |
| H | -2.94553000 | -0.87273500 | 0.97609100  |
| C | -4.57720800 | -2.57747800 | -1.47281500 |
| H | -3.62579400 | -3.45512200 | -3.19492700 |
| H | -5.21845100 | -1.60789700 | 0.34032100  |
| H | -5.57282400 | -2.90661000 | -1.75059600 |

**9b**

|    |             |             |             |
|----|-------------|-------------|-------------|
| C  | 1.33658500  | 0.12968600  | 0.84903200  |
| C  | 2.31178100  | -0.30902700 | 0.21720500  |
| Zn | -0.51335700 | 0.32445300  | 1.46950200  |
| C  | 3.71544100  | -0.41693000 | -0.06858000 |
| C  | 4.55891600  | 0.26483100  | 0.82555700  |
| C  | 4.28600800  | -1.10925900 | -1.14688100 |
| C  | 5.93187200  | 0.26558700  | 0.64452100  |
| H  | 4.11272000  | 0.79222400  | 1.66064500  |
| C  | 5.66849300  | -1.10445300 | -1.32122600 |
| H  | 3.65458800  | -1.64479000 | -1.84154100 |
| C  | 6.49475700  | -0.41911900 | -0.43312300 |
| H  | 6.56635100  | 0.79900900  | 1.34537600  |
| H  | 6.10233700  | -1.64204600 | -2.15875100 |
| H  | 7.57054600  | -0.42019400 | -0.57643600 |
| C  | -1.64831600 | 0.17343900  | 3.10035400  |
| H  | -1.30554900 | 0.96779800  | 3.77822900  |
| H  | -2.69425200 | 0.42831100  | 2.87935100  |
| C  | -1.59407600 | -1.17334800 | 3.84130000  |
| H  | -2.20008400 | -1.17522900 | 4.75751200  |
| H  | -1.95664600 | -1.99953000 | 3.22010600  |

|   |             |             |             |
|---|-------------|-------------|-------------|
| H | -0.57179600 | -1.43100900 | 4.13658900  |
| N | -1.19530500 | 2.01746200  | 0.24309700  |
| C | -0.61749900 | 2.43379700  | -0.86804900 |
| C | -2.26567200 | 2.85506200  | 0.45747400  |
| H | 0.26506400  | 1.99773300  | -1.31104800 |
| C | -2.32597000 | 3.78333000  | -0.54478200 |
| H | -2.91186200 | 2.73385900  | 1.31237900  |
| H | -3.00592200 | 4.59806200  | -0.73511700 |
| C | -0.92178100 | 4.21800800  | -2.60919200 |
| H | -0.72213900 | 5.26885000  | -2.39306700 |
| H | -0.02544600 | 3.77297900  | -3.03884800 |
| H | -1.73273500 | 4.14649700  | -3.33608200 |
| N | -1.26683400 | 3.50375600  | -1.38818500 |

**10**

|    |             |             |             |
|----|-------------|-------------|-------------|
| N  | 0.26593400  | -1.67489000 | -1.01128600 |
| N  | 1.42679000  | -1.55106600 | -1.08873600 |
| N  | -0.72908700 | -1.26638100 | -0.33499800 |
| C  | 1.33484600  | 0.12208600  | 0.84435400  |
| C  | 2.28752800  | -0.34418700 | 0.18535600  |
| Zn | -0.51650700 | 0.32252500  | 1.46757300  |
| C  | 3.70292900  | -0.42851900 | -0.07880400 |
| C  | 4.53732800  | 0.25877100  | 0.81983400  |
| C  | 4.28371000  | -1.11617400 | -1.15351400 |
| C  | 5.91232000  | 0.26585300  | 0.64561600  |
| H  | 4.08598600  | 0.78381100  | 1.65386600  |
| C  | 5.66689600  | -1.10451300 | -1.32157300 |
| H  | 3.65736000  | -1.65515600 | -1.85041700 |
| C  | 6.48518600  | -0.41591900 | -0.42883400 |
| H  | 6.54033600  | 0.80196400  | 1.35018800  |
| H  | 6.10693000  | -1.63982000 | -2.15724700 |
| H  | 7.56178000  | -0.41198700 | -0.56588800 |
| C  | -1.99819600 | -1.73291200 | -0.74880600 |
| C  | -2.19693600 | -2.46480400 | -1.92759000 |
| C  | -3.09471300 | -1.42473900 | 0.06236500  |
| C  | -3.47547100 | -2.88152900 | -2.27811700 |
| H  | -1.35014200 | -2.70724900 | -2.55994900 |
| C  | -4.36967800 | -1.84543400 | -0.29966300 |
| H  | -2.94082300 | -0.86929400 | 0.97902800  |
| C  | -4.57038400 | -2.57500500 | -1.47004100 |
| H  | -3.61623200 | -3.45171500 | -3.19120400 |
| H  | -5.21057600 | -1.60539800 | 0.34334500  |
| C  | -1.64542900 | 0.17531100  | 3.10275400  |
| H  | -1.30257800 | 0.96829600  | 3.78201200  |
| H  | -2.69087100 | 0.43135000  | 2.88090700  |
| C  | -1.59357700 | -1.17290800 | 3.84140500  |
| H  | -2.20086200 | -1.17551100 | 4.75673700  |
| H  | -1.95608400 | -1.99757000 | 3.21828700  |
| H  | -0.57199100 | -1.43211400 | 4.13785400  |
| N  | -1.19370600 | 2.01813600  | 0.24359700  |
| C  | -0.61742400 | 2.43398500  | -0.86853700 |
| C  | -2.26433400 | 2.85544300  | 0.45841500  |
| H  | 0.26323500  | 1.99692900  | -1.31418900 |
| C  | -2.32576600 | 3.78318900  | -0.54426000 |
| H  | -2.91000600 | 2.73420600  | 1.31368500  |
| H  | -3.00640300 | 4.59734300  | -0.73456400 |
| C  | -0.92253900 | 4.21783900  | -2.60955000 |
| H  | -0.72256300 | 5.26862200  | -2.39344700 |
| H  | -0.02655000 | 3.77253000  | -3.03963500 |
| H  | -1.73380200 | 4.14646700  | -3.33607300 |
| N  | -1.26720900 | 3.50366600  | -1.38835600 |
| H  | -5.56584900 | -2.90457700 | -1.74804200 |

**10a**

|   |            |             |             |
|---|------------|-------------|-------------|
| N | 0.26593400 | -1.67489000 | -1.01128600 |
|---|------------|-------------|-------------|

|   |             |             |             |
|---|-------------|-------------|-------------|
| N | 1.42679000  | -1.55106600 | -1.08873600 |
| N | -0.72908700 | -1.26638100 | -0.33499800 |
| C | -1.99819600 | -1.73291200 | -0.74880600 |
| C | -2.19693600 | -2.46480400 | -1.92759000 |
| C | -3.09471300 | -1.42473900 | 0.06236500  |
| C | -3.47547100 | -2.88152900 | -2.27811700 |
| H | -1.35014200 | -2.70724900 | -2.55994900 |
| C | -4.36967800 | -1.84543400 | -0.29966300 |
| H | -2.94082300 | -0.86929400 | 0.97902800  |
| C | -4.57038400 | -2.57500500 | -1.47004100 |
| H | -3.61623200 | -3.45171500 | -3.19120400 |
| H | -5.21057600 | -1.60539800 | 0.34334500  |
| H | -5.56584900 | -2.90457700 | -1.74804200 |

**10b**

|    |             |             |             |
|----|-------------|-------------|-------------|
| C  | 1.33484600  | 0.12208600  | 0.84435400  |
| C  | 2.28752800  | -0.34418700 | 0.18535600  |
| Zn | -0.51650700 | 0.32252500  | 1.46757300  |
| C  | 3.70292900  | -0.42851900 | -0.07880400 |
| C  | 4.53732800  | 0.25877100  | 0.81983400  |
| C  | 4.28371000  | -1.11617400 | -1.15351400 |
| C  | 5.91232000  | 0.26585300  | 0.64561600  |
| H  | 4.08598600  | 0.78381100  | 1.65386600  |
| C  | 5.66689600  | -1.10451300 | -1.32157300 |
| H  | 3.65736000  | -1.65515600 | -1.85041700 |
| C  | 6.48518600  | -0.41591900 | -0.42883400 |
| H  | 6.54033600  | 0.80196400  | 1.35018800  |
| H  | 6.10693000  | -1.63982000 | -2.15724700 |
| H  | 7.56178000  | -0.41198700 | -0.56588800 |
| C  | -1.64542900 | 0.17531100  | 3.10275400  |
| H  | -1.30257800 | 0.96829600  | 3.78201200  |
| H  | -2.69087100 | 0.43135000  | 2.88090700  |
| C  | -1.59357700 | -1.17290800 | 3.84140500  |
| H  | -2.20086200 | -1.17551100 | 4.75673700  |
| H  | -1.95608400 | -1.99757000 | 3.21828700  |
| H  | -0.57199100 | -1.43211400 | 4.13785400  |
| N  | -1.19370600 | 2.01813600  | 0.24359700  |
| C  | -0.61742400 | 2.43398500  | -0.86853700 |
| C  | -2.26433400 | 2.85544300  | 0.45841500  |
| H  | 0.26323500  | 1.99692900  | -1.31418900 |
| C  | -2.32576600 | 3.78318900  | -0.54426000 |
| H  | -2.91000600 | 2.73420600  | 1.31368500  |
| H  | -3.00640300 | 4.59734300  | -0.73456400 |
| C  | -0.92253900 | 4.21783900  | -2.60955000 |
| H  | -0.72256300 | 5.26862200  | -2.39344700 |
| H  | -0.02655000 | 3.77253000  | -3.03963500 |
| H  | -1.73380200 | 4.14646700  | -3.33607300 |
| N  | -1.26720900 | 3.50366600  | -1.38835600 |

**11**

|    |             |             |             |
|----|-------------|-------------|-------------|
| N  | 0.28034400  | -1.67698400 | -1.01823500 |
| N  | 1.45514000  | -1.50924000 | -1.04362900 |
| N  | -0.71078000 | -1.25653300 | -0.33165700 |
| C  | 1.33312800  | 0.11253200  | 0.83785600  |
| C  | 2.25394700  | -0.39134800 | 0.14174500  |
| Zn | -0.51992000 | 0.32061900  | 1.46571700  |
| C  | 3.68728000  | -0.44110400 | -0.08983700 |
| C  | 4.51200500  | 0.25211000  | 0.81360800  |
| C  | 4.28052800  | -1.12316900 | -1.16015500 |
| C  | 5.88980200  | 0.26604000  | 0.64685100  |
| H  | 4.05616400  | 0.77473000  | 1.64712200  |
| C  | 5.66445800  | -1.10430100 | -1.32162200 |
| H  | 3.65948000  | -1.66612500 | -1.85932100 |
| C  | 6.47410400  | -0.41231100 | -0.42387800 |
| H  | 6.51055100  | 0.80495100  | 1.35568400  |

|            |             |             |             |           |             |             |             |
|------------|-------------|-------------|-------------|-----------|-------------|-------------|-------------|
| H          | 6.11092100  | -1.63724100 | -2.15530900 | H         | -1.29994700 | 0.96884900  | 3.78655100  |
| H          | 7.55155000  | -0.40293800 | -0.55386500 | H         | -2.68714400 | 0.43448100  | 2.88223100  |
| C          | -1.98492900 | -1.72582900 | -0.74350000 | C         | -1.59302400 | -1.17249500 | 3.84144600  |
| C          | -2.18736700 | -2.45946100 | -1.92272400 | H         | -2.20173300 | -1.17596600 | 4.75578300  |
| C          | -3.08536700 | -1.42082800 | 0.06505800  | H         | -1.95538200 | -1.99545700 | 3.21615100  |
| C          | -3.46601400 | -2.87728400 | -2.27356500 | H         | -0.57220700 | -1.43336700 | 4.13919400  |
| H          | -1.34091900 | -2.70184200 | -2.55472500 | N         | -1.19200900 | 2.01891400  | 0.24418200  |
| C          | -4.36107800 | -1.84257600 | -0.29692000 | C         | -0.61737200 | 2.43423700  | -0.86903300 |
| H          | -2.93560100 | -0.86526900 | 0.98241200  | C         | -2.26298600 | 2.85585600  | 0.45941000  |
| C          | -4.56259000 | -2.57215200 | -1.46687000 | H         | 0.26108500  | 1.99604700  | -1.31773500 |
| H          | -3.60510400 | -3.44764400 | -3.18693600 | C         | -2.32560500 | 3.78302600  | -0.54372700 |
| H          | -5.20152900 | -1.60252700 | 0.34682200  | H         | -2.90813500 | 2.73457800  | 1.31504200  |
| C          | -1.64229300 | 0.17739400  | 3.10547600  | H         | -3.00700400 | 4.59652300  | -0.73405200 |
| H          | -1.29994700 | 0.96884900  | 3.78655100  | C         | -0.92332700 | 4.21768400  | -2.60989700 |
| H          | -2.68714400 | 0.43448100  | 2.88223100  | H         | -0.72302100 | 5.26839900  | -2.39378800 |
| C          | -1.59302400 | -1.17249500 | 3.84144600  | H         | -0.02769700 | 3.77208000  | -3.04041600 |
| H          | -2.20173300 | -1.17596600 | 4.75578300  | H         | -1.73489500 | 4.14643600  | -3.33604400 |
| H          | -1.95538200 | -1.99545700 | 3.21615100  | N         | -1.26762600 | 3.50359400  | -1.38850700 |
| H          | -0.57220700 | -1.43336700 | 4.13919400  | <b>12</b> |             |             |             |
| N          | -1.19200900 | 2.01891400  | 0.24418200  | N         | 0.30577300  | -1.68911600 | -1.01347600 |
| C          | -0.61737200 | 2.43423700  | -0.86903300 | N         | 1.49081900  | -1.48914700 | -1.00050900 |
| C          | -2.26298600 | 2.85585600  | 0.45941000  | N         | -0.68154100 | -1.25944400 | -0.31915500 |
| H          | 0.26108500  | 1.99604700  | -1.31773500 | C         | 1.34442700  | 0.09288300  | 0.84166800  |
| C          | -2.32560500 | 3.78302600  | -0.54372700 | C         | 2.23899700  | -0.44089000 | 0.11568400  |
| H          | -2.90813500 | 2.73457800  | 1.31504200  | Zn        | -0.50928300 | 0.30871300  | 1.47461200  |
| H          | -3.00700400 | 4.59652300  | -0.73405200 | C         | 3.68744400  | -0.46102700 | -0.08765100 |
| C          | -0.92332700 | 4.21768400  | -2.60989700 | C         | 4.50471100  | 0.23639400  | 0.81933100  |
| H          | -0.72302100 | 5.26839900  | -2.39378800 | C         | 4.29069600  | -1.13867600 | -1.15457300 |
| H          | -0.02769700 | 3.77208000  | -3.04041600 | C         | 5.88475400  | 0.25578200  | 0.65842800  |
| H          | -1.73489500 | 4.14643600  | -3.33604400 | H         | 4.04570700  | 0.75713500  | 1.65268200  |
| N          | -1.26762600 | 3.50359400  | -1.38850700 | C         | 5.67518500  | -1.11432400 | -1.31102000 |
| H          | -5.55789100 | -2.90220300 | -1.74516400 | H         | 3.67355100  | -1.68456300 | -1.85547900 |
| <b>11a</b> |             |             |             | C         | 6.47803600  | -0.41969200 | -0.40934800 |
| N          | 0.28034400  | -1.67698400 | -1.01823500 | H         | 6.49976300  | 0.79682800  | 1.37062900  |
| N          | 1.45514000  | -1.50924000 | -1.04362900 | H         | 6.12669100  | -1.64533100 | -2.14317300 |
| N          | -0.71078000 | -1.25653300 | -0.33165700 | H         | 7.55610600  | -0.40592900 | -0.53375800 |
| C          | -1.98492900 | -1.72582900 | -0.74350000 | C         | -1.96054400 | -1.73044200 | -0.72895100 |
| C          | -2.18736700 | -2.45946100 | -1.92272400 | C         | -2.16554800 | -2.46540500 | -1.90857500 |
| C          | -3.08536700 | -1.42082800 | 0.06505800  | C         | -3.06378200 | -1.42783800 | 0.07768800  |
| C          | -3.46601400 | -2.87728400 | -2.27356500 | C         | -3.44425000 | -2.88415800 | -2.25964600 |
| H          | -1.34091900 | -2.70184200 | -2.55472500 | H         | -1.31927900 | -2.70760800 | -2.54016600 |
| C          | -4.36107800 | -1.84257600 | -0.29692000 | C         | -4.34004600 | -1.85057900 | -0.28429100 |
| H          | -2.93560100 | -0.86526900 | 0.98241200  | H         | -2.91724200 | -0.87214300 | 0.99553600  |
| C          | -4.56259000 | -2.57215200 | -1.46687000 | C         | -4.54205000 | -2.58017500 | -1.45390800 |
| H          | -3.60510400 | -3.44764400 | -3.18693600 | H         | -3.58200800 | -3.45464300 | -3.17323700 |
| H          | -5.20152900 | -1.60252700 | 0.34682200  | H         | -5.18019400 | -1.61064100 | 0.35997200  |
| H          | -5.55789100 | -2.90220300 | -1.74516400 | C         | -1.62670700 | 0.16828100  | 3.11766500  |
| <b>11b</b> |             |             |             | H         | -1.28442300 | 0.95844100  | 3.80011000  |
| C          | 1.33312800  | 0.11253200  | 0.83785600  | H         | -2.67117900 | 0.42628900  | 2.89381100  |
| C          | 2.25394700  | -0.39134800 | 0.14174500  | C         | -1.57915000 | -1.18299800 | 3.85130600  |
| Zn         | -0.51992000 | 0.32061900  | 1.46571700  | H         | -2.18900800 | -1.18750400 | 4.76483400  |
| C          | 3.68728000  | -0.44110400 | -0.08983700 | H         | -1.94115400 | -2.00464000 | 3.22416200  |
| C          | 4.51200500  | 0.25211000  | 0.81360800  | H         | -0.55888000 | -1.44497800 | 4.15001200  |
| C          | 4.28052800  | -1.12316900 | -1.16015500 | N         | -1.17753700 | 2.00872700  | 0.25477600  |
| C          | 5.88980200  | 0.26604000  | 0.64685100  | C         | -0.60401500 | 2.42374300  | -0.85916600 |
| H          | 4.05616400  | 0.77473000  | 1.64712200  | C         | -2.24877100 | 2.84536300  | 0.47032800  |
| C          | 5.66445800  | -1.10430100 | -1.32162200 | H         | 0.27293500  | 1.98481800  | -1.30996500 |
| H          | 3.65948000  | -1.66612500 | -1.85932100 | C         | -2.31221300 | 3.77217300  | -0.53308700 |
| C          | 6.47410400  | -0.41231100 | -0.42387800 | H         | -2.89356400 | 2.72398200  | 1.32619700  |
| H          | 6.51055100  | 0.80495100  | 1.35568400  | H         | -2.99418900 | 4.58518500  | -0.72340400 |
| H          | 6.11092100  | -1.63724100 | -2.15530900 | C         | -0.91060300 | 4.20699900  | -2.59984400 |
| H          | 7.55155000  | -0.40293800 | -0.55386500 | H         | -0.71021400 | 5.25768300  | -2.38367300 |
| C          | -1.64229300 | 0.17739400  | 3.10547600  | H         | -0.01514700 | 3.76130700  | -3.03061900 |

|            |             |             |             |
|------------|-------------|-------------|-------------|
| H          | -1.72235600 | 4.13576500  | -3.32575200 |
| N          | -1.25460700 | 3.49288800  | -1.37833300 |
| H          | -5.53719800 | -2.91069400 | -1.73242300 |
| <b>12a</b> |             |             |             |
| N          | 0.30577300  | -1.68911600 | -1.01347600 |
| N          | 1.49081900  | -1.48914700 | -1.00050900 |
| N          | -0.68154100 | -1.25944400 | -0.31915500 |
| C          | -1.96054400 | -1.73044200 | -0.72895100 |
| C          | -2.16554800 | -2.46540500 | -1.90857500 |
| C          | -3.06378200 | -1.42783800 | 0.07768800  |
| C          | -3.44425000 | -2.88415800 | -2.25964600 |
| H          | -1.31927900 | -2.70760800 | -2.54016600 |
| C          | -4.34004600 | -1.85057900 | -0.28429100 |
| H          | -2.91724200 | -0.87214300 | 0.99553600  |
| C          | -4.54205000 | -2.58017500 | -1.45390800 |
| H          | -3.58200800 | -3.45464300 | -3.17323700 |
| H          | -5.18019400 | -1.61064100 | 0.35997200  |
| H          | -5.53719800 | -2.91069400 | -1.73242300 |
| <b>12b</b> |             |             |             |
| C          | 1.34442700  | 0.09288300  | 0.84166800  |
| C          | 2.23899700  | -0.44089000 | 0.11568400  |
| Zn         | -0.50928300 | 0.30871300  | 1.47461200  |
| C          | 3.68744400  | -0.46102700 | -0.08765100 |
| C          | 4.50471100  | 0.23639400  | 0.81933100  |
| C          | 4.29069600  | -1.13867600 | -1.15457300 |
| C          | 5.88475400  | 0.25578200  | 0.65842800  |
| H          | 4.04570700  | 0.75713500  | 1.65268200  |
| C          | 5.67518500  | -1.11432400 | -1.31102000 |
| H          | 3.67355100  | -1.68456300 | -1.85547900 |
| C          | 6.47803600  | -0.41969200 | -0.40934800 |
| H          | 6.49976300  | 0.79682800  | 1.37062900  |
| H          | 6.12669100  | -1.64533100 | -2.14317300 |
| H          | 7.55610600  | -0.40592900 | -0.53375800 |
| C          | -1.62670700 | 0.16828100  | 3.11766500  |
| H          | -1.28442300 | 0.95844100  | 3.80011000  |
| H          | -2.67117900 | 0.42628900  | 2.89381100  |
| C          | -1.57915000 | -1.18299800 | 3.85130600  |
| H          | -2.18900800 | -1.18750400 | 4.76483400  |
| H          | -1.94115400 | -2.00464000 | 3.22416200  |
| H          | -0.55888000 | -1.44497800 | 4.15001200  |
| N          | -1.17753700 | 2.00872700  | 0.25477600  |
| C          | -0.60401500 | 2.42374300  | -0.85916600 |
| C          | -2.24877100 | 2.84536300  | 0.47032800  |
| H          | 0.27293500  | 1.98481800  | -1.30996500 |
| C          | -2.31221300 | 3.77217300  | -0.53308700 |
| H          | -2.89356400 | 2.72398200  | 1.32619700  |
| H          | -2.99418900 | 4.58518500  | -0.72340400 |
| C          | -0.91060300 | 4.20699900  | -2.59984400 |
| H          | -0.71021400 | 5.25768300  | -2.38367300 |
| H          | -0.01514700 | 3.76130700  | -3.03061900 |
| H          | -1.72235600 | 4.13576500  | -3.32575200 |
| N          | -1.25460700 | 3.49288800  | -1.37833300 |
| <b>13</b>  |             |             |             |
| N          | 0.30163000  | -1.68069100 | -1.02909800 |
| N          | 1.49297200  | -1.46086900 | -0.99176600 |
| N          | -0.68140900 | -1.24320200 | -0.32870200 |
| C          | 1.32793200  | 0.09450700  | 0.82529900  |
| C          | 2.20483300  | -0.45885000 | 0.07922600  |
| Zn         | -0.52459300 | 0.31859800  | 1.46403900  |
| C          | 3.66290200  | -0.45829500 | -0.10450800 |
| C          | 4.47325900  | 0.24259800  | 0.80540600  |
| C          | 4.27405800  | -1.13275900 | -1.16866600 |
| C          | 5.85471000  | 0.26699000  | 0.64975300  |

|            |             |             |             |
|------------|-------------|-------------|-------------|
| H          | 4.01062300  | 0.76161600  | 1.63810300  |
| C          | 5.65901500  | -1.10349900 | -1.32047100 |
| H          | 3.66044800  | -1.68121800 | -1.87107100 |
| C          | 6.45558900  | -0.40611100 | -0.41538500 |
| H          | 6.46470400  | 0.81008400  | 1.36469200  |
| H          | 6.11534900  | -1.63292400 | -2.15099400 |
| H          | 7.53416900  | -0.38836500 | -0.53492100 |
| C          | -1.96438400 | -1.71459100 | -0.73553700 |
| C          | -2.17144500 | -2.45055100 | -1.91522300 |
| C          | -3.06896000 | -1.41346500 | 0.07034000  |
| C          | -3.45019500 | -2.86999700 | -2.26588700 |
| H          | -1.32548800 | -2.69265400 | -2.54674400 |
| C          | -4.34573200 | -1.83697800 | -0.29114100 |
| H          | -2.92435800 | -0.85762500 | 0.98846100  |
| C          | -4.54848400 | -2.56669600 | -1.46036900 |
| H          | -3.58738900 | -3.44069200 | -3.17946900 |
| H          | -5.18538200 | -1.59701700 | 0.35381100  |
| C          | -1.63797700 | 0.18082700  | 3.10989200  |
| H          | -1.29407500 | 0.96980200  | 3.79281400  |
| H          | -2.68212200 | 0.44069600  | 2.88676000  |
| C          | -1.59223000 | -1.17136800 | 3.84206800  |
| H          | -2.20197100 | -1.17577500 | 4.75563900  |
| H          | -1.95545000 | -1.99184900 | 3.21417300  |
| H          | -0.57230400 | -1.43505000 | 4.14045900  |
| N          | -1.18974900 | 2.02046200  | 0.24515400  |
| C          | -0.61731500 | 2.43472100  | -0.86968400 |
| C          | -2.26090500 | 2.85720000  | 0.46099100  |
| H          | 0.25842700  | 1.99499100  | -1.32197200 |
| C          | -2.32517700 | 3.78332400  | -0.54298600 |
| H          | -2.90508200 | 2.73632700  | 1.31738400  |
| H          | -3.00740000 | 4.59611200  | -0.73333400 |
| C          | -0.92465300 | 4.21727100  | -2.61075900 |
| H          | -0.72343900 | 5.26784900  | -2.39486500 |
| H          | -0.02984400 | 3.77090500  | -3.04217500 |
| H          | -1.73698900 | 4.14639100  | -3.33602600 |
| N          | -1.26821600 | 3.50356900  | -1.38885300 |
| H          | -5.54364300 | -2.89753700 | -1.73854300 |
| <b>13a</b> |             |             |             |
| N          | 0.30163000  | -1.68069100 | -1.02909800 |
| N          | 1.49297200  | -1.46086900 | -0.99176600 |
| N          | -0.68140900 | -1.24320200 | -0.32870200 |
| C          | -1.96438400 | -1.71459100 | -0.73553700 |
| C          | -2.17144500 | -2.45055100 | -1.91522300 |
| C          | -3.06896000 | -1.41346500 | 0.07034000  |
| C          | -3.45019500 | -2.86999700 | -2.26588700 |
| H          | -1.32548800 | -2.69265400 | -2.54674400 |
| C          | -4.34573200 | -1.83697800 | -0.29114100 |
| H          | -2.92435800 | -0.85762500 | 0.98846100  |
| C          | -4.54848400 | -2.56669600 | -1.46036900 |
| H          | -3.58738900 | -3.44069200 | -3.17946900 |
| H          | -5.18538200 | -1.59701700 | 0.35381100  |
| H          | -5.54364300 | -2.89753700 | -1.73854300 |
| <b>13b</b> |             |             |             |
| C          | 1.32793200  | 0.09450700  | 0.82529900  |
| C          | 2.20483300  | -0.45885000 | 0.07922600  |
| Zn         | -0.52459300 | 0.31859800  | 1.46403900  |
| C          | 3.66290200  | -0.45829500 | -0.10450800 |
| C          | 4.47325900  | 0.24259800  | 0.80540600  |
| C          | 4.27405800  | -1.13275900 | -1.16866600 |
| C          | 5.85471000  | 0.26699000  | 0.64975300  |
| H          | 4.01062300  | 0.76161600  | 1.63810300  |
| C          | 5.65901500  | -1.10349900 | -1.32047100 |
| H          | 3.66044800  | -1.68121800 | -1.87107100 |

|           |             |             |             |            |             |             |             |
|-----------|-------------|-------------|-------------|------------|-------------|-------------|-------------|
| C         | 6.45558900  | -0.40611100 | -0.41538500 | H          | -2.90186800 | 2.73988800  | 1.32034100  |
| H         | 6.46470400  | 0.81008400  | 1.36469200  | H          | -3.00616700 | 4.59759900  | -0.73202100 |
| H         | 6.11534900  | -1.63292400 | -2.15099400 | C          | -0.92624400 | 4.21612500  | -2.61198800 |
| H         | 7.53416900  | -0.38836500 | -0.53492100 | H          | -0.72346300 | 5.26656100  | -2.39690500 |
| C         | -1.63797700 | 0.18082700  | 3.10989200  | H          | -0.03273000 | 3.76846700  | -3.04472900 |
| H         | -1.29407500 | 0.96980200  | 3.79281400  | H          | -1.73993400 | 4.14578800  | -3.33576700 |
| H         | -2.68212200 | 0.44069600  | 2.88676000  | N          | -1.26858500 | 3.50342000  | -1.38908100 |
| C         | -1.59223000 | -1.17136800 | 3.84206800  | H          | -5.53142900 | -2.89034100 | -1.72553100 |
| H         | -2.20197100 | -1.17577500 | 4.75563900  | <b>14a</b> |             |             |             |
| H         | -1.95545000 | -1.99184900 | 3.21417300  | N          | 0.31200200  | -1.69020300 | -1.04335700 |
| H         | -0.57230400 | -1.43505000 | 4.14045900  | N          | 1.50777500  | -1.46118900 | -0.99225500 |
| N         | -1.18974900 | 2.02046200  | 0.24515400  | N          | -0.66054200 | -1.24006900 | -0.33373700 |
| C         | -0.61731500 | 2.43472100  | -0.86968400 | C          | -1.94897000 | -1.70664900 | -0.73226800 |
| C         | -2.26090500 | 2.85720000  | 0.46099100  | C          | -2.16006500 | -2.44307100 | -1.91143700 |
| H         | 0.25842700  | 1.99499100  | -1.32197200 | C          | -3.05151200 | -1.40506900 | 0.07591000  |
| C         | -2.32517700 | 3.78332400  | -0.54298600 | C          | -3.43919600 | -2.86275100 | -2.25857700 |
| H         | -2.90508200 | 2.73632700  | 1.31738400  | H          | -1.31563600 | -2.68544400 | -2.54432600 |
| H         | -3.00740000 | 4.59611200  | -0.73333400 | C          | -4.32946600 | -1.82891900 | -0.28228700 |
| C         | -0.92465300 | 4.21727100  | -2.61075900 | H          | -2.90613000 | -0.84925100 | 0.99393900  |
| H         | -0.72343900 | 5.26784900  | -2.39486500 | C          | -4.53551200 | -2.55927700 | -1.45032800 |
| H         | -0.02984400 | 3.77090500  | -3.04217500 | H          | -3.57839900 | -3.43387600 | -3.17159800 |
| H         | -1.73698900 | 4.14639100  | -3.33602600 | H          | -5.16731300 | -1.58862400 | 0.36489400  |
| N         | -1.26821600 | 3.50356900  | -1.38885300 | H          | -5.53142900 | -2.89034100 | -1.72553100 |
| <b>14</b> |             |             |             | <b>14b</b> |             |             |             |
| N         | 0.31200200  | -1.69020300 | -1.04335700 | C          | 1.31784000  | 0.07689600  | 0.81261300  |
| N         | 1.50777500  | -1.46118900 | -0.99225500 | C          | 2.18301700  | -0.48910000 | 0.05209200  |
| N         | -0.66054200 | -1.24006900 | -0.33373700 | Zn         | -0.52734000 | 0.31914900  | 1.46495700  |
| C         | 1.31784000  | 0.07689600  | 0.81261300  | C          | 3.64676000  | -0.46928800 | -0.11319800 |
| C         | 2.18301700  | -0.48910000 | 0.05209200  | C          | 4.44431800  | 0.23705100  | 0.80216200  |
| Zn        | -0.52734000 | 0.31914900  | 1.46495700  | C          | 4.26940900  | -1.13928900 | -1.17338000 |
| C         | 3.64676000  | -0.46928800 | -0.11319800 | C          | 5.82677700  | 0.27100000  | 0.65587200  |
| C         | 4.44431800  | 0.23705100  | 0.80216200  | H          | 3.97280400  | 0.75240400  | 1.63235300  |
| C         | 4.26940900  | -1.13928900 | -1.17338000 | C          | 5.65491400  | -1.10064200 | -1.31613200 |
| C         | 5.82677700  | 0.27100000  | 0.65587200  | H          | 3.66312100  | -1.69178700 | -1.87910800 |
| H         | 3.97280400  | 0.75240400  | 1.63235300  | C          | 6.43982900  | -0.39773700 | -0.40508800 |
| C         | 5.65491400  | -1.10064200 | -1.31613200 | H          | 6.42819600  | 0.81798600  | 1.37508900  |
| H         | 3.66312100  | -1.69178700 | -1.87910800 | H          | 6.12077700  | -1.62673500 | -2.14348500 |
| C         | 6.43982900  | -0.39773700 | -0.40508800 | H          | 7.51912200  | -0.37231000 | -0.51664400 |
| H         | 6.42819600  | 0.81798600  | 1.37508900  | C          | -1.63461500 | 0.18424600  | 3.11452300  |
| H         | 6.12077700  | -1.62673500 | -2.14348500 | H          | -1.28502000 | 0.97073400  | 3.79738000  |
| H         | 7.51912200  | -0.37231000 | -0.51664400 | H          | -2.67836300 | 0.44875000  | 2.89524200  |
| C         | -1.94897000 | -1.70664900 | -0.73226800 | C          | -1.59161100 | -1.16945300 | 3.84408000  |
| C         | -2.16006500 | -2.44307100 | -1.91143700 | H          | -2.19932600 | -1.17330000 | 4.75894900  |
| C         | -3.05151200 | -1.40506900 | 0.07591000  | H          | -1.95892000 | -1.98761700 | 3.21559400  |
| C         | -3.43919600 | -2.86275100 | -2.25857700 | H          | -0.57189300 | -1.43694600 | 4.13971600  |
| H         | -1.31563600 | -2.68544400 | -2.54432600 | N          | -1.18855700 | 2.02185000  | 0.24621000  |
| C         | -4.32946600 | -1.82891900 | -0.28228700 | C          | -0.61761800 | 2.43463900  | -0.87005700 |
| H         | -2.90613000 | -0.84925100 | 0.99393900  | C          | -2.25885200 | 2.85954500  | 0.46291200  |
| C         | -4.53551200 | -2.55927700 | -1.45032800 | H          | 0.25646400  | 1.99333300  | -1.32395600 |
| H         | -3.57839900 | -3.43387600 | -3.17159800 | C          | -2.32408500 | 3.78464700  | -0.54188700 |
| H         | -5.16731300 | -1.58862400 | 0.36489400  | H          | -2.90186800 | 2.73988800  | 1.32034100  |
| C         | -1.63461500 | 0.18424600  | 3.11452300  | H          | -3.00616700 | 4.59759900  | -0.73202100 |
| H         | -1.28502000 | 0.97073400  | 3.79738000  | C          | -0.92624400 | 4.21612500  | -2.61198800 |
| H         | -2.67836300 | 0.44875000  | 2.89524200  | H          | -0.72346300 | 5.26656100  | -2.39690500 |
| C         | -1.59161100 | -1.16945300 | 3.84408000  | H          | -0.03273000 | 3.76846700  | -3.04472900 |
| H         | -2.19932600 | -1.17330000 | 4.75894900  | H          | -1.73993400 | 4.14578800  | -3.33576700 |
| H         | -1.95892000 | -1.98761700 | 3.21559400  | N          | -1.26858500 | 3.50342000  | -1.38908100 |
| H         | -0.57189300 | -1.43694600 | 4.13971600  | <b>15</b>  |             |             |             |
| N         | -1.18855700 | 2.02185000  | 0.24621000  | C          | 1.31784000  | 0.07689600  | 0.81261300  |
| C         | -0.61761800 | 2.43463900  | -0.87005700 | C          | 2.18301700  | -0.48910000 | 0.05209200  |
| C         | -2.25885200 | 2.85954500  | 0.46291200  | Zn         | -0.52734000 | 0.31914900  | 1.46495700  |
| H         | 0.25646400  | 1.99333300  | -1.32395600 | C          | 3.64676000  | -0.46928800 | -0.11319800 |
| C         | -2.32408500 | 3.78464700  | -0.54188700 | C          | 4.44431800  | 0.23705100  | 0.80216200  |

|            |             |             |             |            |             |             |             |
|------------|-------------|-------------|-------------|------------|-------------|-------------|-------------|
| C          | 4.26940900  | -1.13928900 | -1.17338000 | H          | -1.96311700 | -1.98131200 | 3.21862500  |
| C          | 5.82677700  | 0.27100000  | 0.65587200  | H          | -0.57091700 | -1.43909300 | 4.13993300  |
| H          | 3.97280400  | 0.75240400  | 1.63235300  | N          | -1.18834900 | 2.02272800  | 0.24848200  |
| C          | 5.65491400  | -1.10064200 | -1.31613200 | C          | -0.61911100 | 2.43263300  | -0.86990800 |
| H          | 3.66312100  | -1.69178700 | -1.87910800 | C          | -2.25632900 | 2.86315100  | 0.46659800  |
| C          | 6.43982900  | -0.39773700 | -0.40508800 | H          | 0.25237400  | 1.98802800  | -1.32551800 |
| H          | 6.42819600  | 0.81798600  | 1.37508900  | C          | -2.32183500 | 3.78687600  | -0.53934300 |
| H          | 6.12077700  | -1.62673500 | -2.14348500 | H          | -2.89766000 | 2.74616100  | 1.32564600  |
| H          | 7.51912200  | -0.37231000 | -0.51664400 | H          | -3.00260300 | 4.60102600  | -0.72902800 |
| C          | -1.63461500 | 0.18424600  | 3.11452300  | C          | -0.92813700 | 4.21263200  | -2.61333600 |
| H          | -1.28502000 | 0.97073400  | 3.79738000  | H          | -0.72300800 | 5.26294200  | -2.39994300 |
| H          | -2.67836300 | 0.44875000  | 2.89524200  | H          | -0.03646900 | 3.76280300  | -3.04759600 |
| C          | -1.59161100 | -1.16945300 | 3.84408000  | H          | -1.74369600 | 4.14280800  | -3.33503500 |
| H          | -2.19932600 | -1.17330000 | 4.75894900  | N          | -1.26895300 | 3.50209600  | -1.38863300 |
| H          | -1.95892000 | -1.98761700 | 3.21559400  | <b>16</b>  |             |             |             |
| H          | -0.57189300 | -1.43694600 | 4.13971600  | N          | 0.34793000  | -1.78644900 | -1.13992800 |
| N          | -1.18855700 | 2.02185000  | 0.24621000  | N          | 1.55473300  | -1.55532000 | -1.07301300 |
| C          | -0.61761800 | 2.43463900  | -0.87005700 | N          | -0.58220800 | -1.28330100 | -0.40840600 |
| C          | -2.25885200 | 2.85954500  | 0.46291200  | C          | 1.24266900  | -0.01586900 | 0.71387100  |
| H          | 0.25646400  | 1.99333300  | -1.32395600 | C          | 2.11774800  | -0.59132400 | -0.04812500 |
| C          | -2.32408500 | 3.78464700  | -0.54188700 | Zn         | -0.51716900 | 0.35286900  | 1.49555200  |
| H          | -2.90186800 | 2.73988800  | 1.32034100  | C          | 3.59397800  | -0.50101400 | -0.14076600 |
| H          | -3.00616700 | 4.59759900  | -0.73202100 | C          | 4.33405000  | 0.22730700  | 0.80374400  |
| C          | -0.92624400 | 4.21612500  | -2.61198800 | C          | 4.27773500  | -1.14551600 | -1.17982400 |
| H          | -0.72346300 | 5.26656100  | -2.39690500 | C          | 5.71989800  | 0.30736900  | 0.70659300  |
| H          | -0.03273000 | 3.76846700  | -3.04472900 | H          | 3.81889000  | 0.72304000  | 1.62008700  |
| H          | -1.73993400 | 4.14578800  | -3.33576700 | C          | 5.66502300  | -1.06164900 | -1.27333900 |
| N          | -1.26858500 | 3.50342000  | -1.38908100 | H          | 3.71458300  | -1.71516800 | -1.90697100 |
| <b>15a</b> |             |             |             | C          | 6.39301400  | -0.33670300 | -0.33281600 |
| N          | 0.32209900  | -1.71244500 | -1.06833400 | H          | 6.27706600  | 0.87068700  | 1.44854500  |
| N          | 1.52124600  | -1.48265500 | -1.01196600 | H          | 6.17687700  | -1.56950500 | -2.08480700 |
| N          | -0.63813200 | -1.24752800 | -0.35101600 | H          | 7.47428300  | -0.27539600 | -0.40468500 |
| C          | -1.93421100 | -1.70352000 | -0.73668300 | C          | -1.90023900 | -1.70722800 | -0.75899200 |
| C          | -2.15800700 | -2.43893300 | -1.91438200 | C          | -2.16495100 | -2.43743100 | -1.93251500 |
| C          | -3.02905000 | -1.39687300 | 0.07968100  | C          | -2.97226800 | -1.38426600 | 0.08102200  |
| C          | -3.44101300 | -2.85400200 | -2.25095800 | C          | -3.46118500 | -2.83276400 | -2.23932000 |
| H          | -1.31939900 | -2.68486200 | -2.55325400 | H          | -1.34506000 | -2.69670100 | -2.58958000 |
| C          | -4.31151900 | -1.81591400 | -0.26823300 | C          | -4.26942700 | -1.78261500 | -0.23765900 |
| H          | -2.87541400 | -0.84199700 | 0.99695300  | H          | -2.79215200 | -0.83467800 | 0.99680200  |
| C          | -4.52963900 | -2.54634800 | -1.43387500 | C          | -4.52620800 | -2.50943700 | -1.39742700 |
| H          | -3.58961600 | -3.42496200 | -3.16260800 | H          | -3.63885800 | -3.40098300 | -3.14753300 |
| H          | -5.14318500 | -1.57213500 | 0.38559100  | H          | -5.08154800 | -1.52634000 | 0.43569800  |
| H          | -5.52895500 | -2.87407500 | -1.70061000 | C          | -1.61381700 | 0.20473400  | 3.14582400  |
| <b>15b</b> |             |             |             | H          | -1.25401400 | 0.97960000  | 3.83645700  |
| C          | 1.30095100  | 0.05255100  | 0.78929600  | H          | -2.65452200 | 0.48300400  | 2.93048200  |
| C          | 2.16402500  | -0.51863600 | 0.02410300  | C          | -1.58257500 | -1.15839700 | 3.85794400  |
| Zn         | -0.52681100 | 0.32489400  | 1.47025200  | H          | -2.18756200 | -1.16499900 | 4.77429600  |
| C          | 3.63154500  | -0.47960700 | -0.12142900 | H          | -1.96131300 | -1.96452800 | 3.22113600  |
| C          | 4.41268700  | 0.23357400  | 0.80186500  | H          | -0.56511300 | -1.44057300 | 4.14689600  |
| C          | 4.27053500  | -1.14322800 | -1.17590400 | N          | -1.18857600 | 2.02586900  | 0.25888300  |
| C          | 5.79618200  | 0.28068300  | 0.66886500  | C          | -0.62315100 | 2.42554300  | -0.86570400 |
| H          | 3.92861500  | 0.74372700  | 1.62813600  | C          | -2.25117200 | 2.87325900  | 0.47775800  |
| C          | 5.65674700  | -1.09167000 | -1.30536000 | H          | 0.24209700  | 1.97122900  | -1.32348000 |
| H          | 3.67570600  | -1.70092000 | -1.88721300 | C          | -2.31696000 | 3.79084500  | -0.53342800 |
| C          | 6.42580900  | -0.38169400 | -0.38632600 | H          | -2.88873300 | 2.76497400  | 1.34072300  |
| H          | 6.38554000  | 0.83282000  | 1.39410800  | H          | -2.99449100 | 4.60734300  | -0.72451000 |
| H          | 6.13567000  | -1.61296900 | -2.12827900 | C          | -0.93173200 | 4.19812300  | -2.61662800 |
| H          | 7.50587100  | -0.34589700 | -0.48711400 | H          | -0.72019100 | 5.24824100  | -2.40878800 |
| C          | -1.62939800 | 0.18926800  | 3.12174000  | H          | -0.04466200 | 3.74160400  | -3.05321400 |
| H          | -1.27447000 | 0.97273100  | 3.80530600  | H          | -1.75141000 | 4.12914300  | -3.33364500 |
| H          | -2.67234300 | 0.45892800  | 2.90533200  | N          | -1.27017100 | 3.49511100  | -1.38664100 |
| C          | -1.59021700 | -1.16634300 | 3.84786300  | H          | -5.53630400 | -2.82210000 | -1.64066300 |
| H          | -2.19535600 | -1.16915100 | 4.76436100  | <b>16a</b> |             |             |             |



|            |             |             |             |            |             |             |             |
|------------|-------------|-------------|-------------|------------|-------------|-------------|-------------|
| N          | 0.34793000  | -1.78644900 | -1.13992800 | H          | 6.17241700  | 0.89771600  | 1.49543400  |
| N          | 1.55473300  | -1.55532000 | -1.07301300 | H          | 6.19920400  | -1.52966100 | -2.04739800 |
| N          | -0.58220800 | -1.28330100 | -0.40840600 | H          | 7.43567900  | -0.21714700 | -0.33221500 |
| C          | -1.90023900 | -1.70722800 | -0.75899200 | C          | -1.85749800 | -1.70679200 | -0.77726600 |
| C          | -2.16495100 | -2.43743100 | -1.93251500 | C          | -2.15976500 | -2.43153300 | -1.94726300 |
| C          | -2.97226800 | -1.38426600 | 0.08102200  | C          | -2.91063700 | -1.37239500 | 0.08213000  |
| C          | -3.46118500 | -2.83276400 | -2.23932000 | C          | -3.46621300 | -2.81101700 | -2.22890900 |
| H          | -1.34506000 | -2.69670100 | -2.58958000 | H          | -1.35739700 | -2.70177400 | -2.62044600 |
| C          | -4.26942700 | -1.78261500 | -0.23765900 | C          | -4.22033800 | -1.75337000 | -0.21250900 |
| H          | -2.79215200 | -0.83467800 | 0.99680200  | H          | -2.71092200 | -0.82969700 | 0.99820000  |
| C          | -4.52620800 | -2.50943700 | -1.39742700 | C          | -4.51097100 | -2.47597500 | -1.36653900 |
| H          | -3.63885800 | -3.40098300 | -3.14753300 | H          | -3.66705500 | -3.37617900 | -3.13421900 |
| H          | -5.08154800 | -1.52634000 | 0.43569800  | H          | -5.01479600 | -1.48731500 | 0.47793600  |
| H          | -5.53630400 | -2.82210000 | -1.64066300 | C          | -1.60199300 | 0.22173800  | 3.17419200  |
| <b>16b</b> |             |             |             | H          | -1.24237200 | 0.98666800  | 3.87564100  |
| C          | 1.24266900  | -0.01586900 | 0.71387100  | H          | -2.64083900 | 0.50557000  | 2.95792800  |
| C          | 2.11774800  | -0.59132400 | -0.04812500 | C          | -1.57569800 | -1.15144900 | 3.86713100  |
| Zn         | -0.51716900 | 0.35286900  | 1.49555200  | H          | -2.18290600 | -1.16732900 | 4.78166200  |
| C          | 3.59397800  | -0.50101400 | -0.14076600 | H          | -1.95574200 | -1.94770300 | 3.21903000  |
| C          | 4.33405000  | 0.22730700  | 0.80374400  | H          | -0.55988200 | -1.44047300 | 4.15449900  |
| C          | 4.27773500  | -1.14551600 | -1.17982400 | N          | -1.18933700 | 2.03206800  | 0.27125900  |
| C          | 5.71989800  | 0.30736900  | 0.70659300  | C          | -0.62545700 | 2.42169500  | -0.85835100 |
| H          | 3.81889000  | 0.72304000  | 1.62008700  | C          | -2.24975300 | 2.88343600  | 0.48638600  |
| C          | 5.66502300  | -1.06164900 | -1.27333900 | H          | 0.23600100  | 1.95929200  | -1.31510700 |
| H          | 3.71458300  | -1.71516800 | -1.90697100 | C          | -2.31549000 | 3.79334400  | -0.53131500 |
| C          | 6.39301400  | -0.33670300 | -0.33281600 | H          | -2.88581600 | 2.78303000  | 1.35139000  |
| H          | 6.27706600  | 0.87068700  | 1.44854500  | H          | -2.99162600 | 4.60990800  | -0.72690800 |
| H          | 6.17687700  | -1.56950500 | -2.08480700 | C          | -0.93330000 | 4.18464100  | -2.61925000 |
| H          | 7.47428300  | -0.27539600 | -0.40468500 | H          | -0.71750500 | 5.23486300  | -2.41651500 |
| C          | -1.61381700 | 0.20473400  | 3.14582400  | H          | -0.04911800 | 3.72276800  | -3.05594800 |
| H          | -1.25401400 | 0.97960000  | 3.83645700  | H          | -1.75526000 | 4.11523900  | -3.33351900 |
| H          | -2.65452200 | 0.48300400  | 2.93048200  | N          | -1.27132000 | 3.48875500  | -1.38476700 |
| C          | -1.58257500 | -1.15839700 | 3.85794400  | H          | -5.52963300 | -2.77592900 | -1.58922900 |
| H          | -2.18756200 | -1.16499900 | 4.77429600  | <b>17a</b> |             |             |             |
| H          | -1.96131300 | -1.96452800 | 3.22113600  | N          | 0.37878600  | -1.86569400 | -1.21659600 |
| H          | -0.56511300 | -1.44057300 | 4.14689600  | N          | 1.59336700  | -1.62987000 | -1.13764800 |
| N          | -1.18857600 | 2.02586900  | 0.25888300  | N          | -0.51281200 | -1.31866400 | -0.46549100 |
| C          | -0.62315100 | 2.42554300  | -0.86570400 | C          | -1.85749800 | -1.70679200 | -0.77726600 |
| C          | -2.25117200 | 2.87325900  | 0.47775800  | C          | -2.15976500 | -2.43153300 | -1.94726300 |
| H          | 0.24209700  | 1.97122900  | -1.32348000 | C          | -2.91063700 | -1.37239500 | 0.08213000  |
| C          | -2.31696000 | 3.79084500  | -0.53342800 | C          | -3.46621300 | -2.81101700 | -2.22890900 |
| H          | -2.88873300 | 2.76497400  | 1.34072300  | H          | -1.35739700 | -2.70177400 | -2.62044600 |
| H          | -2.99449100 | 4.60734300  | -0.72451000 | C          | -4.22033800 | -1.75337000 | -0.21250900 |
| C          | -0.93173200 | 4.19812300  | -2.61662800 | H          | -2.71092200 | -0.82969700 | 0.99820000  |
| H          | -0.72019100 | 5.24824100  | -2.40878800 | C          | -4.51097100 | -2.47597500 | -1.36653900 |
| H          | -0.04466200 | 3.74160400  | -3.05321400 | H          | -3.66705500 | -3.37617900 | -3.13421900 |
| H          | -1.75141000 | 4.12914300  | -3.33364500 | H          | -5.01479600 | -1.48731500 | 0.47793600  |
| N          | -1.27017100 | 3.49511100  | -1.38664100 | H          | -5.52963300 | -2.77592900 | -1.58922900 |
| <b>17</b>  |             |             |             | <b>17b</b> |             |             |             |
| N          | 0.37878600  | -1.86569400 | -1.21659600 | C          | 1.15103800  | -0.10321700 | 0.62467700  |
| N          | 1.59336700  | -1.62987000 | -1.13764800 | C          | 2.06599900  | -0.66554400 | -0.11965200 |
| N          | -0.51281200 | -1.31866400 | -0.46549100 | Zn         | -0.50854400 | 0.38703400  | 1.52803400  |
| C          | 1.15103800  | -0.10321700 | 0.62467700  | C          | 3.54919500  | -0.51874300 | -0.15647600 |
| C          | 2.06599900  | -0.66554400 | -0.11965200 | C          | 4.25570200  | 0.21985900  | 0.80543800  |
| Zn         | -0.50854400 | 0.38703400  | 1.52803400  | C          | 4.27448600  | -1.14380000 | -1.18210900 |
| C          | 3.54919500  | -0.51874300 | -0.15647600 | C          | 5.64361800  | 0.32677500  | 0.73859700  |
| C          | 4.25570200  | 0.21985900  | 0.80543800  | H          | 3.71691100  | 0.70274200  | 1.61443600  |
| C          | 4.27448600  | -1.14380000 | -1.18210900 | C          | 5.66114100  | -1.03403700 | -1.24528000 |
| C          | 5.64361800  | 0.32677500  | 0.73859700  | H          | 3.74029100  | -1.72243300 | -1.92317900 |
| H          | 3.71691100  | 0.70274200  | 1.61443600  | C          | 6.35434700  | -0.29949300 | -0.28616800 |
| C          | 5.66114100  | -1.03403700 | -1.24528000 | H          | 6.17241700  | 0.89771600  | 1.49543400  |
| H          | 3.74029100  | -1.72243300 | -1.92317900 | H          | 6.19920400  | -1.52966100 | -2.04739800 |
| C          | 6.35434700  | -0.29949300 | -0.28616800 | H          | 7.43567900  | -0.21714700 | -0.33221500 |

|           |             |             |             |            |             |             |             |
|-----------|-------------|-------------|-------------|------------|-------------|-------------|-------------|
| C         | -1.60199300 | 0.22173800  | 3.17419200  | H          | -0.05041400 | 3.71403500  | -3.05666500 |
| H         | -1.24237200 | 0.98666800  | 3.87564100  | H          | -1.75615300 | 4.10871600  | -3.33376000 |
| H         | -2.64083900 | 0.50557000  | 2.95792800  | N          | -1.27192700 | 3.48600900  | -1.38390500 |
| C         | -1.57569800 | -1.15144900 | 3.86713100  | H          | -5.51671000 | -2.75253600 | -1.56097700 |
| H         | -2.18290600 | -1.16732900 | 4.78166200  | <b>18a</b> |             |             |             |
| H         | -1.95574200 | -1.94770300 | 3.21903000  | N          | 0.40046700  | -1.91439800 | -1.26545900 |
| H         | -0.55988200 | -1.44047300 | 4.15449900  | N          | 1.62049500  | -1.67403900 | -1.17843900 |
| N         | -1.18933700 | 2.03206800  | 0.27125900  | N          | -0.45791200 | -1.33297500 | -0.49489000 |
| C         | -0.62545700 | 2.42169500  | -0.85835100 | C          | -1.82550600 | -1.69855900 | -0.78042100 |
| C         | -2.24975300 | 2.88343600  | 0.48638600  | C          | -2.14755200 | -2.42138300 | -1.94911200 |
| H         | 0.23600100  | 1.95929200  | -1.31510700 | C          | -2.87168300 | -1.36255100 | 0.08684600  |
| C         | -2.31549000 | 3.79334400  | -0.53131500 | C          | -3.45830900 | -2.79588600 | -2.21942100 |
| H         | -2.88581600 | 2.78303000  | 1.35139000  | H          | -1.35497600 | -2.69629400 | -2.63098700 |
| H         | -2.99162600 | 4.60990800  | -0.72690800 | C          | -4.18753600 | -1.73714900 | -0.19756400 |
| C         | -0.93330000 | 4.18464100  | -2.61925000 | H          | -2.66704000 | -0.82452800 | 1.00474200  |
| H         | -0.71750500 | 5.23486300  | -2.41651500 | C          | -4.49447100 | -2.45750700 | -1.34830100 |
| H         | -0.04911800 | 3.72276800  | -3.05594800 | H          | -3.66771100 | -3.35953900 | -3.12372000 |
| H         | -1.75526000 | 4.11523900  | -3.33351900 | H          | -4.97300600 | -1.46743600 | 0.50168600  |
| N         | -1.27132000 | 3.48875500  | -1.38476700 | H          | -5.51671000 | -2.75253600 | -1.56097700 |
| <b>18</b> |             |             |             | <b>18b</b> |             |             |             |
| N         | 0.40046700  | -1.91439800 | -1.26545900 | C          | 1.06499900  | -0.17472700 | 0.55579100  |
| N         | 1.62049500  | -1.67403900 | -1.17843900 | C          | 2.03050000  | -0.71227500 | -0.16382400 |
| N         | -0.45791200 | -1.33297500 | -0.49489000 | Zn         | -0.50480200 | 0.40692100  | 1.54802300  |
| C         | 1.06499900  | -0.17472700 | 0.55579100  | C          | 3.51757500  | -0.52721300 | -0.16334200 |
| C         | 2.03050000  | -0.71227500 | -0.16382400 | C          | 4.20919500  | 0.21551300  | 0.80647300  |
| Zn        | -0.50480200 | 0.40692100  | 1.54802300  | C          | 4.26748500  | -1.14109900 | -1.18176400 |
| C         | 3.51757500  | -0.52721300 | -0.16334200 | C          | 5.59885300  | 0.33524700  | 0.75474600  |
| C         | 4.20919500  | 0.21551300  | 0.80647300  | H          | 3.66046900  | 0.69250500  | 1.61251800  |
| C         | 4.26748500  | -1.14109900 | -1.18176400 | C          | 5.65324700  | -1.01938100 | -1.22999100 |
| C         | 5.59885300  | 0.33524700  | 0.75474600  | H          | 3.74963400  | -1.72399400 | -1.93032900 |
| H         | 3.66046900  | 0.69250500  | 1.61251800  | C          | 6.32938700  | -0.28117100 | -0.26158200 |
| C         | 5.65324700  | -1.01938100 | -1.22999100 | H          | 6.11247700  | 0.90959300  | 1.51953200  |
| H         | 3.74963400  | -1.72399400 | -1.93032900 | H          | 6.20340800  | -1.50891600 | -2.02770400 |
| C         | 6.32938700  | -0.28117100 | -0.26158200 | H          | 7.41041800  | -0.18837500 | -0.29378100 |
| H         | 6.11247700  | 0.90959300  | 1.51953200  | C          | -1.59701000 | 0.23231400  | 3.19126500  |
| H         | 6.20340800  | -1.50891600 | -2.02770400 | H          | -1.23881500 | 0.99090700  | 3.90009800  |
| H         | 7.41041800  | -0.18837500 | -0.29378100 | H          | -2.63491800 | 0.51885500  | 2.97429000  |
| C         | -1.82550600 | -1.69855900 | -0.78042100 | C          | -1.57284900 | -1.14736300 | 3.87171500  |
| C         | -2.14755200 | -2.42138300 | -1.94911200 | H          | -2.18188300 | -1.17007300 | 4.78474700  |
| C         | -2.87168300 | -1.36255100 | 0.08684600  | H          | -1.95245200 | -1.93773200 | 3.21629700  |
| C         | -3.45830900 | -2.79588600 | -2.21942100 | H          | -0.55791200 | -1.43967800 | 4.15852200  |
| H         | -1.35497600 | -2.69629400 | -2.63098700 | N          | -1.19042000 | 2.03655000  | 0.27815900  |
| C         | -4.18753600 | -1.73714900 | -0.19756400 | C          | -0.62652200 | 2.42074700  | -0.85380100 |
| H         | -2.66704000 | -0.82452800 | 1.00474200  | C          | -2.25023800 | 2.88948200  | 0.49009100  |
| C         | -4.49447100 | -2.45750700 | -1.34830100 | H          | 0.23340000  | 1.95411400  | -1.30920300 |
| H         | -3.66771100 | -3.35953900 | -3.12372000 | C          | -2.31557600 | 3.79496200  | -0.53130700 |
| H         | -4.97300600 | -1.46743600 | 0.50168600  | H          | -2.88607300 | 2.79327400  | 1.35575000  |
| C         | -1.59701000 | 0.23231400  | 3.19126500  | H          | -2.99120000 | 4.61117900  | -0.73008200 |
| H         | -1.23881500 | 0.99090700  | 3.90009800  | C          | -0.93346200 | 4.17842800  | -2.62041300 |
| H         | -2.63491800 | 0.51885500  | 2.97429000  | H          | -0.71584700 | 5.22870400  | -2.42002200 |
| C         | -1.57284900 | -1.14736300 | 3.87171500  | H          | -0.05041400 | 3.71403500  | -3.05666500 |
| H         | -2.18188300 | -1.17007300 | 4.78474700  | H          | -1.75615300 | 4.10871600  | -3.33376000 |
| H         | -1.95245200 | -1.93773200 | 3.21629700  | N          | -1.27192700 | 3.48600900  | -1.38390500 |
| H         | -0.55791200 | -1.43967800 | 4.15852200  | <b>19</b>  |             |             |             |
| N         | -1.19042000 | 2.03655000  | 0.27815900  | N          | 0.42429500  | -1.95962700 | -1.31241600 |
| C         | -0.62652200 | 2.42074700  | -0.85380100 | N          | 1.65024400  | -1.71142600 | -1.21453100 |
| C         | -2.25023800 | 2.88948200  | 0.49009100  | N          | -0.38756400 | -1.33228800 | -0.51075500 |
| H         | 0.23340000  | 1.95411400  | -1.30920300 | C          | 0.94053100  | -0.26913700 | 0.46732900  |
| C         | -2.31557600 | 3.79496200  | -0.53130700 | C          | 1.99154400  | -0.75842400 | -0.20732900 |
| H         | -2.88607300 | 2.79327400  | 1.35575000  | Zn         | -0.50224300 | 0.42314400  | 1.56549200  |
| H         | -2.99120000 | 4.61117900  | -0.73008200 | C          | 3.48403000  | -0.53241100 | -0.16675200 |
| C         | -0.93346200 | 4.17842800  | -2.62041300 | C          | 4.16872000  | 0.21227900  | 0.80752200  |
| H         | -0.71584700 | 5.22870400  | -2.42002200 | C          | 4.25782000  | -1.13699100 | -1.17936200 |

|            |             |             |             |           |             |             |             |
|------------|-------------|-------------|-------------|-----------|-------------|-------------|-------------|
| C          | 5.56106200  | 0.34073200  | 0.76659200  | H         | 3.75437700  | -1.72298800 | -1.93434300 |
| H          | 3.61580300  | 0.68642400  | 1.61268400  | C         | 6.30736300  | -0.26774100 | -0.24230700 |
| C          | 5.64268400  | -1.00786400 | -1.21726800 | H         | 6.06287400  | 0.91738300  | 1.53758800  |
| H          | 3.75437700  | -1.72298800 | -1.93434300 | H         | 6.20032300  | -1.49350000 | -2.01231100 |
| C          | 6.30736300  | -0.26774100 | -0.24230700 | H         | 7.38805200  | -0.16753600 | -0.26381900 |
| H          | 6.06287400  | 0.91738300  | 1.53758800  | C         | -1.59419900 | 0.24199200  | 3.20604100  |
| H          | 6.20032300  | -1.49350000 | -2.01231100 | H         | -1.23886000 | 0.99472000  | 3.92234100  |
| H          | 7.38805200  | -0.16753600 | -0.26381900 | H         | -2.63167000 | 0.53015700  | 2.98867600  |
| C          | -1.79023700 | -1.68018600 | -0.77253300 | C         | -1.57110000 | -1.14378800 | 3.87500600  |
| C          | -2.12687600 | -2.40444400 | -1.94161800 | H         | -2.18181700 | -1.17346400 | 4.78660600  |
| C          | -2.83663400 | -1.34999200 | 0.09629500  | H         | -1.94954800 | -1.92933500 | 3.21311400  |
| C          | -3.44067900 | -2.77961200 | -2.20674500 | H         | -0.55675900 | -1.43837400 | 4.16135700  |
| H          | -1.34268400 | -2.68230400 | -2.63047200 | N         | -1.19222300 | 2.04122800  | 0.28383900  |
| C          | -4.15696800 | -1.72351000 | -0.18421000 | C         | -0.62756600 | 2.42067600  | -0.84981300 |
| H          | -2.63649600 | -0.81594900 | 1.01749700  | C         | -2.25158100 | 2.89514600  | 0.49239700  |
| C          | -4.47402500 | -2.44216700 | -1.33243400 | H         | 0.23147600  | 1.95047100  | -1.30338600 |
| H          | -3.65105300 | -3.34251800 | -3.11123800 | C         | -2.31615400 | 3.79686700  | -0.53208900 |
| H          | -4.93636100 | -1.45262100 | 0.52128700  | H         | -2.88746900 | 2.80243900  | 1.35842100  |
| C          | -1.59419900 | 0.24199200  | 3.20604100  | H         | -2.99125700 | 4.61276800  | -0.73393300 |
| H          | -1.23886000 | 0.99472000  | 3.92234100  | C         | -0.93321700 | 4.17427100  | -2.62127000 |
| H          | -2.63167000 | 0.53015700  | 2.98867600  | H         | -0.71437800 | 5.22457500  | -2.42244000 |
| C          | -1.57110000 | -1.14378800 | 3.87500600  | H         | -0.05082400 | 3.70812500  | -3.05692000 |
| H          | -2.18181700 | -1.17346400 | 4.78660600  | H         | -1.75621200 | 4.10439800  | -3.33421500 |
| H          | -1.94954800 | -1.92933500 | 3.21311400  | N         | -1.27245700 | 3.48437700  | -1.38341900 |
| H          | -0.55675900 | -1.43837400 | 4.16135700  | <b>20</b> |             |             |             |
| N          | -1.19222300 | 2.04122800  | 0.28383900  | N         | 0.44251000  | -1.98844200 | -1.34336200 |
| C          | -0.62756600 | 2.42067600  | -0.84981300 | N         | 1.67170200  | -1.73271100 | -1.23572200 |
| C          | -2.25158100 | 2.89514600  | 0.49239700  | N         | -0.32566200 | -1.31804600 | -0.50908400 |
| H          | 0.23147600  | 1.95047100  | -1.30338600 | C         | 0.82055600  | -0.35724800 | 0.38666300  |
| C          | -2.31615400 | 3.79686700  | -0.53208900 | C         | 1.96249600  | -0.78819100 | -0.23513500 |
| H          | -2.88746900 | 2.80243900  | 1.35842100  | Zn        | -0.50055100 | 0.43167000  | 1.57529500  |
| H          | -2.99125700 | 4.61276800  | -0.73393300 | C         | 3.45989000  | -0.53387500 | -0.16687000 |
| C          | -0.93321700 | 4.17427100  | -2.62127000 | C         | 4.14501900  | 0.21075900  | 0.80833500  |
| H          | -0.71437800 | 5.22457500  | -2.42244000 | C         | 4.25017500  | -1.13321500 | -1.17643100 |
| H          | -0.05082400 | 3.70812500  | -3.05692000 | C         | 5.53976800  | 0.34312400  | 0.77243200  |
| H          | -1.75621200 | 4.10439800  | -3.33421500 | H         | 3.59250000  | 0.68462400  | 1.61425400  |
| N          | -1.27245700 | 3.48437700  | -1.38341900 | C         | 5.63452300  | -1.00157400 | -1.20975800 |
| H          | -5.49789200 | -2.73572700 | -1.53938700 | H         | 3.75623400  | -1.72067000 | -1.93579800 |
| <b>19a</b> |             |             |             | C         | 6.29471500  | -0.26091300 | -0.23187200 |
| N          | 0.42429500  | -1.95962700 | -1.31241600 | H         | 6.03517700  | 0.92092100  | 1.54687100  |
| N          | 1.65024400  | -1.71142600 | -1.21453100 | H         | 6.19474800  | -1.48578700 | -2.00402500 |
| N          | -0.38756400 | -1.33228800 | -0.51075500 | H         | 7.37522900  | -0.15720500 | -0.24793100 |
| C          | -1.79023700 | -1.68018600 | -0.77253300 | C         | -1.76408000 | -1.66074400 | -0.75962700 |
| C          | -2.12687600 | -2.40444400 | -1.94161800 | C         | -2.10702900 | -2.38853600 | -1.93027500 |
| C          | -2.83663400 | -1.34999200 | 0.09629500  | C         | -2.81544300 | -1.33972200 | 0.10593500  |
| C          | -3.44067900 | -2.77961200 | -2.20674500 | C         | -3.42287000 | -2.76749700 | -2.19605200 |
| H          | -1.34268400 | -2.68230400 | -2.63047200 | H         | -1.32788200 | -2.66773400 | -2.62304700 |
| C          | -4.15696800 | -1.72351000 | -0.18421000 | C         | -4.13792000 | -1.71568300 | -0.17600600 |
| H          | -2.63649600 | -0.81594900 | 1.01749700  | H         | -2.62418600 | -0.80774100 | 1.02995200  |
| C          | -4.47402500 | -2.44216700 | -1.33243400 | C         | -4.45810100 | -2.43329200 | -1.32319600 |
| H          | -3.65105300 | -3.34251800 | -3.11123800 | H         | -3.62913600 | -3.33028000 | -3.10149700 |
| H          | -4.93636100 | -1.45262100 | 0.52128700  | H         | -4.91482400 | -1.44529200 | 0.53232100  |
| H          | -5.49789200 | -2.73572700 | -1.53938700 | C         | -1.59289800 | 0.24863500  | 3.21521200  |
| <b>19b</b> |             |             |             | H         | -1.24161200 | 0.99721600  | 3.93768500  |
| C          | 0.94053100  | -0.26913700 | 0.46732900  | H         | -2.63042800 | 0.53705700  | 2.99722600  |
| C          | 1.99154400  | -0.75842400 | -0.20732900 | C         | -1.57029500 | -1.14147700 | 3.87648900  |
| Zn         | -0.50224300 | 0.42314400  | 1.56549200  | H         | -2.18210000 | -1.17632000 | 4.78714500  |
| C          | 3.48403000  | -0.53241100 | -0.16675200 | H         | -1.94762400 | -1.92421200 | 3.21044400  |
| C          | 4.16872000  | 0.21227900  | 0.80752200  | H         | -0.55625000 | -1.43734400 | 4.16251300  |
| C          | 4.25782000  | -1.13699100 | -1.17936200 | N         | -1.19377000 | 2.04487900  | 0.28727100  |
| C          | 5.56106200  | 0.34073200  | 0.76659200  | C         | -0.62832800 | 2.42107400  | -0.84731200 |
| H          | 3.61580300  | 0.68642400  | 1.61268400  | C         | -2.25284600 | 2.89904400  | 0.49333900  |
| C          | 5.64268400  | -1.00786400 | -1.21726800 | H         | 0.23058300  | 1.94884500  | -1.29930100 |

|            |             |             |             |   |             |             |             |
|------------|-------------|-------------|-------------|---|-------------|-------------|-------------|
| C          | -2.31678600 | 3.79840800  | -0.53306600 | C | 4.25017500  | -1.13321500 | -1.17643100 |
| H          | -2.88870800 | 2.80852200  | 1.35964700  | C | 5.53976800  | 0.34312400  | 0.77243200  |
| H          | -2.99150800 | 4.61411200  | -0.73704200 | H | 3.59250000  | 0.68462400  | 1.61425400  |
| C          | -0.93290800 | 4.17237300  | -2.62178600 | C | 5.63452300  | -1.00157400 | -1.20975800 |
| H          | -0.71344500 | 5.22267900  | -2.42369300 | H | 3.75623400  | -1.72067000 | -1.93579800 |
| H          | -0.05074900 | 3.70536700  | -3.05696300 | C | 6.29471500  | -0.26091300 | -0.23187200 |
| H          | -1.75591900 | 4.10251600  | -3.33470500 | H | 6.03517700  | 0.92092100  | 1.54687100  |
| N          | -1.27282500 | 3.48381700  | -1.38335000 | H | 6.19474800  | -1.48578700 | -2.00402500 |
| H          | -5.48197800 | -2.72774300 | -1.52911400 | H | 7.37522900  | -0.15720500 | -0.24793100 |
| <b>20a</b> |             |             |             | C | -1.59289800 | 0.24863500  | 3.21521200  |
| N          | 0.44251000  | -1.98844200 | -1.34336200 | H | -1.24161200 | 0.99721600  | 3.93768500  |
| N          | 1.67170200  | -1.73271100 | -1.23572200 | H | -2.63042800 | 0.53705700  | 2.99722600  |
| N          | -0.32566200 | -1.31804600 | -0.50908400 | C | -1.57029500 | -1.14147700 | 3.87648900  |
| C          | -1.76408000 | -1.66074400 | -0.75962700 | H | -2.18210000 | -1.17632000 | 4.78714500  |
| C          | -2.10702900 | -2.38853600 | -1.93027500 | H | -1.94762400 | -1.92421200 | 3.21044400  |
| C          | -2.81544300 | -1.33972200 | 0.10593500  | H | -0.55625000 | -1.43734400 | 4.16251300  |
| C          | -3.42287000 | -2.76749700 | -2.19605200 | N | -1.19377000 | 2.04487900  | 0.28727100  |
| H          | -1.32788200 | -2.66773400 | -2.62304700 | C | -0.62832800 | 2.42107400  | -0.84731200 |
| C          | -4.13792000 | -1.71568300 | -0.17600600 | C | -2.25284600 | 2.89904400  | 0.49333900  |
| H          | -2.62418600 | -0.80774100 | 1.02995200  | H | 0.23058300  | 1.94884500  | -1.29930100 |
| C          | -4.45810100 | -2.43329200 | -1.32319600 | C | -2.31678600 | 3.79840800  | -0.53306600 |
| H          | -3.62913600 | -3.33028000 | -3.10149700 | H | -2.88870800 | 2.80852200  | 1.35964700  |
| H          | -4.91482400 | -1.44529200 | 0.53232100  | H | -2.99150800 | 4.61411200  | -0.73704200 |
| H          | -5.48197800 | -2.72774300 | -1.52911400 | C | -0.93290800 | 4.17237300  | -2.62178600 |
| <b>20b</b> |             |             |             | H | -0.71344500 | 5.22267900  | -2.42369300 |
| C          | 0.82055600  | -0.35724800 | 0.38666300  | H | -0.05074900 | 3.70536700  | -3.05696300 |
| C          | 1.96249600  | -0.78819100 | -0.23513500 | H | -1.75591900 | 4.10251600  | -3.33470500 |
| Zn         | -0.50055100 | 0.43167000  | 1.57529500  | N | -1.27282500 | 3.48381700  | -1.38335000 |
| C          | 3.45989000  | -0.53387500 | -0.16687000 |   |             |             |             |
| C          | 4.14501900  | 0.21075900  | 0.80833500  |   |             |             |             |

## 10. The orbital energies of the model complex

|           | LUMO     |           | HOMO     |            |
|-----------|----------|-----------|----------|------------|
|           | Hartree  | eV        | Hartree  | eV         |
| <b>2</b>  | -0.05226 | -1.421472 | -0.53388 | -14.521536 |
| <b>7</b>  | 0.08138  | 2.213536  | -0.2346  | -6.38112   |
| <b>15</b> | 0.05599  | 1.522928  | -0.2096  | -5.70112   |
| <b>22</b> | 0.06903  | 1.877616  | -0.1885  | -5.1272    |

## 11. The values of proportions which represent the weight of the atomic orbitals in the ground state molecular orbitals

### 11.1 The values for the proportions of 2 in the ground state molecular orbitals

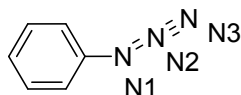

| Eigenvalues | HOMO     |                 | LUMO     |                 |
|-------------|----------|-----------------|----------|-----------------|
|             | 19       | 19 <sup>2</sup> | 32       | 33 <sup>2</sup> |
| N1 1S       | 0.03466  | 0.001201        | -0.01175 | 1.6E-09         |
| 2S          | 0.05572  | 0.003105        | -0.01885 | 4.9E-09         |
| 2PX         | -0.00183 | 3.35E-06        | -0.00601 | 4E-10           |
| 2PY         | 0.09291  | 0.008632        | -0.08453 | 2.25E-08        |
| 2PZ         | -0.00024 | 5.76E-08        | -0.00016 | 0.002718        |
| 3S          | -0.16302 | 0.026576        | 0.04298  | 3.24E-08        |
| 3PX         | -0.01065 | 0.000113        | -0.00315 | 9E-10           |
| 3PY         | 0.13624  | 0.018561        | -0.12256 | 4.84E-08        |
| 3PZ         | -0.00038 | 1.44E-07        | -0.00023 | 0.006371        |
| 4S          | -0.19155 | 0.036691        | 0.12696  | 5.48E-07        |
| 4PX         | 0.0044   | 1.94E-05        | -0.08361 | 1.6E-09         |
| 4PY         | 0.07484  | 0.005601        | -0.17447 | 3.24E-08        |
| 4PZ         | -0.00021 | 4.41E-08        | -0.00031 | 0.011092        |
| 5S          | 1.31667  | 1.73362         | 1.67422  | 0.000247        |
| 5PX         | 0.20616  | 0.042502        | 0.40969  | 8.94E-06        |
| 5PY         | 0.21288  | 0.045318        | 0.23408  | 6.86E-06        |
| 5PZ         | 0.00027  | 7.29E-08        | 0.0001   | 0.004598        |
| 6D 0        | -0.00369 | 1.36E-05        | 0.00757  | 1E-10           |
| 6D+1        | -0.00004 | 1.6E-09         | 0.00003  | 0.000677        |
| 6D-1        | -0.00003 | 9E-10           | 0.00002  | 2.96E-05        |
| 6D+2        | -0.02469 | 0.00061         | -0.02624 | 2.5E-09         |
| 6D-2        | 0.00404  | 1.63E-05        | 0.01019  | 9E-10           |
| N2 1S       | -0.02335 | 0.000545        | -0.00053 | 4E-10           |
| 2S          | -0.03785 | 0.001433        | -0.00054 | 1.6E-09         |
| 2PX         | -0.12307 | 0.015146        | -0.12048 | 1E-08           |
| 2PY         | 0.14105  | 0.019895        | 0.17971  | 1.68E-07        |
| 2PZ         | -0.00054 | 2.92E-07        | 0.00034  | 0.023688        |
| 3S          | 0.11352  | 0.012887        | -0.00951 | 1.96E-08        |
| 3PX         | -0.1835  | 0.033672        | -0.18095 | 2.56E-08        |
| 3PY         | 0.21434  | 0.045942        | 0.28177  | 3.97E-07        |
| 3PZ         | -0.00081 | 6.56E-07        | 0.00053  | 0.056084        |
| 4S          | 0.15862  | 0.02516         | 0.09102  | 2.25E-08        |
| 4PX         | -0.1372  | 0.018824        | -0.30775 | 1E-08           |
| 4PY         | 0.16313  | 0.026611        | 0.30228  | 7.92E-07        |
| 4PZ         | -0.00057 | 3.25E-07        | 0.00063  | 0.09997         |

|       |          |          |          |          |
|-------|----------|----------|----------|----------|
| 5S    | -0.27848 | 0.077551 | -0.42149 | 2.34E-05 |
| 5PX   | 0.70933  | 0.503149 | 0.65051  | 5.31E-05 |
| 5PY   | 0.46832  | 0.219324 | 0.79981  | 3.47E-05 |
| 5PZ   | 0.00065  | 4.23E-07 | 0.00125  | 0.045959 |
| 6D 0  | -0.00109 | 1.19E-06 | 0.00517  | 1E-10    |
| 6D+1  | 0        | 0        | -0.00003 | 0.000195 |
| 6D-1  | 0        | 0        | -0.00004 | 8.76E-05 |
| 6D+2  | -0.00341 | 1.16E-05 | 0.02145  | 1.6E-09  |
| 6D-2  | 0.00518  | 2.68E-05 | -0.01796 | 1E-10    |
| N3 1S | 0.02169  | 0.00047  | 0.00392  | 1E-10    |
| 2S    | 0.03502  | 0.001226 | 0.00632  | 4E-10    |
| 2PX   | -0.08013 | 0.006421 | 0.12233  | 1.21E-08 |
| 2PY   | 0.07967  | 0.006347 | -0.17065 | 1.3E-07  |
| 2PZ   | -0.00032 | 1.02E-07 | -0.00033 | 0.020964 |
| 3S    | -0.1038  | 0.010774 | -0.02094 | 4.9E-09  |
| 3PX   | -0.11615 | 0.013491 | 0.18338  | 2.56E-08 |
| 3PY   | 0.12524  | 0.015685 | -0.25642 | 2.92E-07 |
| 3PZ   | -0.00048 | 2.3E-07  | -0.0005  | 0.046695 |
| 4S    | -0.12216 | 0.014923 | 0.00343  | 1.69E-08 |
| 4PX   | -0.05419 | 0.002937 | 0.22216  | 1.02E-07 |
| 4PY   | 0.06652  | 0.004425 | -0.35514 | 4.76E-07 |
| 4PZ   | -0.00025 | 6.25E-08 | -0.00068 | 0.087515 |
| 5S    | -1.05796 | 1.119279 | -1.17766 | 0.000118 |
| 5PX   | 0.15065  | 0.022695 | 0.35955  | 3.42E-06 |
| 5PY   | 0.10727  | 0.011507 | -0.14242 | 1.76E-07 |
| 5PZ   | 0.00001  | 1E-10    | -0.00047 | 0.050968 |
| 6D 0  | -0.00057 | 3.25E-07 | 0.00055  | 1E-10    |
| 6D+1  | 0.00007  | 4.9E-09  | -0.00001 | 5.17E-05 |
| 6D-1  | 0.00003  | 9E-10    | -0.00001 | 1.85E-05 |
| 6D+2  | 0.02523  | 0.000637 | 0.00994  | 4E-10    |
| 6D-2  | -0.01018 | 0.000104 | -0.00535 | 1E-10    |

\* The data of 5 tracks is not used in the calculated for the proportion

## 11.2 The values for the proportions of 7 in the ground state molecular orbitals

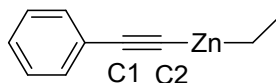

| Eigenvalues | HOMO | LUMO |
|-------------|------|------|
|-------------|------|------|

|       | 45       | 45 <sup>2</sup> | 64       | 64 <sup>2</sup> |
|-------|----------|-----------------|----------|-----------------|
| C1 1S | 0        | 0               | 0.00094  | 8.836E-07       |
| 2S    | 0        | 0               | 0.0019   | 0.00000361      |
| 2PX   | 0        | 0               | -0.00796 | 6.3362E-05      |
| 2PY   | 0        | 0               | -0.10714 | 0.01147898      |
| 2PZ   | 0.10652  | 0.011347        | 0        | 0               |
| 3S    | 0        | 0               | -0.0101  | 0.00010201      |
| 3PX   | 0        | 0               | -0.01953 | 0.00038142      |
| 3PY   | 0        | 0               | -0.15742 | 0.02478106      |
| 3PZ   | 0.16061  | 0.025796        | 0.00001  | 1E-10           |
| 4S    | -0.00002 | 4E-10           | 0.28245  | 0.079778        |
| 4PX   | -0.00002 | 4E-10           | 0.26166  | 0.06846596      |
| 4PY   | 0        | 0               | -0.40188 | 0.16150753      |
| 4PZ   | 0.13294  | 0.017673        | 0.00002  | 4E-10           |
| 5S    | 0        | 0               | -2.89468 | 8.3791723       |
| 5PX   | 0        | 0               | 1.38596  | 1.92088512      |
| 5PY   | 0        | 0               | -0.51203 | 0.26217472      |
| 5PZ   | 0.03565  | 0.001271        | -0.00042 | 1.764E-07       |
| 6D 0  | 0        | 0               | 0.00352  | 1.239E-05       |
| 6D+1  | 0.03041  | 0.000925        | 0        | 0               |
| 6D-1  | -0.00172 | 2.96E-06        | 0        | 0               |
| 6D+2  | 0        | 0               | -0.00114 | 1.2996E-06      |
| 6D-2  | 0        | 0               | 0.03059  | 0.00093575      |
| C2 1S | 0        | 0               | 0.00391  | 1.5288E-05      |
| 2S    | 0        | 0               | 0.00674  | 4.5428E-05      |
| 2PX   | 0        | 0               | 0.00739  | 5.4612E-05      |
| 2PY   | 0        | 0               | 0.1282   | 0.01643524      |
| 2PZ   | 0.14701  | 0.021612        | -0.00001 | 1E-10           |
| 3S    | 0        | 0               | -0.03345 | 0.0011189       |
| 3PX   | 0        | 0               | -0.00672 | 4.5158E-05      |
| 3PY   | 0        | 0               | 0.18942  | 0.03587994      |
| 3PZ   | 0.21689  | 0.047041        | -0.00001 | 1E-10           |
| 4S    | 0.00003  | 9E-10           | -0.04045 | 0.0016362       |
| 4PX   | -0.00002 | 4E-10           | 0.45617  | 0.20809107      |
| 4PY   | 0        | 0               | 0.37946  | 0.14398989      |
| 4PZ   | 0.19898  | 0.039593        | -0.00004 | 1.6E-09         |
| 5S    | 0        | 0               | 0.22022  | 0.04849685      |
| 5PX   | -0.00001 | 1E-10           | 1.62321  | 2.6348107       |
| 5PY   | 0        | 0               | -0.62989 | 0.39676141      |
| 5PZ   | 0.01908  | 0.000364        | 0.00049  | 2.401E-07       |
| 6D 0  | 0        | 0               | 0.00053  | 2.809E-07       |
| 6D+1  | -0.00998 | 9.96E-05        | 0        | 0               |
| 6D-1  | 0.00058  | 3.36E-07        | 0        | 0               |
| 6D+2  | 0        | 0               | 0.00377  | 1.4213E-05      |
| 6D-2  | 0        | 0               | 0.01997  | 0.0003988       |

\* The date of 5 tracks is not used in the calculated for the proportion

### 11.3 The values for the proportions of 15 in the ground state molecular orbitals

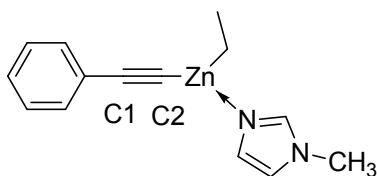

| Eigenvalues | HOMO     |                 | LUMO     |                 |
|-------------|----------|-----------------|----------|-----------------|
|             | 67       | 67 <sup>2</sup> | 84       | 84 <sup>2</sup> |
| C1 1S       | -0.00177 | 3.13E-06        | 0.00051  | 2.601E-07       |
| 2S          | -0.00291 | 8.47E-06        | 0.00056  | 3.136E-07       |
| 2PX         | -0.04062 | 0.00165         | 0.00681  | 4.6376E-05      |
| 2PY         | -0.11066 | 0.012246        | 0.02344  | 0.00054943      |
| 2PZ         | 0.0242   | 0.000586        | 0.03453  | 0.00119232      |
| 3S          | 0.00782  | 6.12E-05        | 0.00497  | 2.4701E-05      |
| 3PX         | -0.05985 | 0.003582        | 0.00706  | 4.9844E-05      |
| 3PY         | -0.16563 | 0.027433        | 0.03472  | 0.00120548      |
| 3PZ         | 0.03641  | 0.001326        | 0.05129  | 0.00263066      |
| 4S          | 0.01539  | 0.000237        | -0.08679 | 0.0075325       |
| 4PX         | -0.04818 | 0.002321        | 0.00293  | 8.5849E-06      |
| 4PY         | -0.15104 | 0.022813        | 0.08169  | 0.00667326      |
| 4PZ         | 0.03084  | 0.000951        | 0.0957   | 0.00915849      |
| 5S          | -0.00197 | 3.88E-06        | -1.24764 | 1.55660557      |
| 5PX         | 0.00787  | 6.19E-05        | -0.97272 | 0.9461842       |
| 5PY         | -0.1554  | 0.024149        | -0.89662 | 0.80392742      |
| 5PZ         | -0.02795 | 0.000781        | -6.50635 | 42.3325903      |
| 6D 0        | -0.0006  | 3.6E-07         | 0.00053  | 2.809E-07       |
| 6D+1        | -0.00568 | 3.23E-05        | 0.01509  | 0.00022771      |
| 6D-1        | 0.00188  | 3.53E-06        | -0.00502 | 2.52E-05        |
| 6D+2        | 0.01494  | 0.000223        | 0.00348  | 1.211E-05       |
| 6D-2        | 0.02065  | 0.000426        | 0.00324  | 1.0498E-05      |
| C2 1S       | 0.00475  | 2.26E-05        | -0.00217 | 4.7089E-06      |
| 2S          | 0.00765  | 5.85E-05        | -0.00376 | 1.4138E-05      |
| 2PX         | -0.03005 | 0.000903        | -0.00831 | 6.9056E-05      |
| 2PY         | -0.13596 | 0.018485        | -0.02458 | 0.00060418      |
| 2PZ         | 0.03118  | 0.000972        | -0.06645 | 0.0044156       |
| 3S          | -0.02143 | 0.000459        | 0.01621  | 0.00026276      |
| 3PX         | -0.04543 | 0.002064        | -0.0143  | 0.00020449      |
| 3PY         | -0.19898 | 0.039593        | -0.03853 | 0.00148456      |
| 3PZ         | 0.04576  | 0.002094        | -0.10688 | 0.01142333      |
| 4S          | -0.04176 | 0.001744        | -0.02313 | 0.000535        |
| 4PX         | -0.03982 | 0.001586        | -0.0157  | 0.00024649      |
| 4PY         | -0.17778 | 0.031606        | -0.0635  | 0.00403225      |
| 4PZ         | 0.04225  | 0.001785        | -0.11317 | 0.01280745      |
| 5S          | -0.08598 | 0.007393        | -1.31479 | 1.72867274      |
| 5PX         | 0.15712  | 0.024687        | 1.29782  | 1.68433675      |
| 5PY         | 0.05506  | 0.003032        | -0.01024 | 0.00010486      |
| 5PZ         | 0.02089  | 0.000436        | 3.15463  | 9.95169044      |
| 6D 0        | 0.00014  | 1.96E-08        | 0.00096  | 9.216E-07       |
| 6D+1        | 0.00252  | 6.35E-06        | 0.00833  | 6.9389E-05      |



|      |          |          |          |            |
|------|----------|----------|----------|------------|
| 6D-1 | -0.00097 | 9.41E-07 | -0.00252 | 6.3504E-06 |
| 6D+2 | -0.0094  | 8.84E-05 | 0.00351  | 1.232E-05  |
| 6D-2 | -0.01191 | 0.000142 | 0.00551  | 3.036E-05  |

\* The date of 5 tracks is not used in the calculated for the proportion

#### 11.4 The values for the proportions of 22 in the ground state molecular orbitals

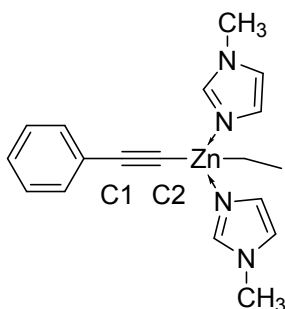

| Eigenvalues | HOMO     |                 | LUMO     |                  |
|-------------|----------|-----------------|----------|------------------|
|             | 89       | 89 <sup>2</sup> | 115      | 115 <sup>2</sup> |
| C1 1S       | 0.00403  | 1.62E-05        | -0.0037  | 1.37E-05         |
| 2S          | 0.00656  | 4.3E-05         | -0.00602 | 3.62E-05         |
| 2PX         | -0.02985 | 0.000891        | 0.00713  | 5.08E-05         |
| 2PY         | -0.03658 | 0.001338        | -0.05925 | 0.003511         |
| 2PZ         | 0.09068  | 0.008223        | -0.03435 | 0.00118          |
| 3S          | -0.0179  | 0.00032         | 0.0195   | 0.00038          |
| 3PX         | -0.04214 | 0.001776        | 0.01606  | 0.000258         |
| 3PY         | -0.05486 | 0.00301         | -0.09057 | 0.008203         |
| 3PZ         | 0.13538  | 0.018328        | -0.05602 | 0.003138         |
| 4S          | -0.03482 | 0.001212        | 0.0305   | 0.00093          |
| 4PX         | -0.01489 | 0.000222        | -0.13084 | 0.017119         |
| 4PY         | -0.0465  | 0.002162        | -0.14987 | 0.022461         |
| 4PZ         | 0.1363   | 0.018578        | -0.10119 | 0.010239         |
| 5S          | -0.05373 | 0.002887        | -0.3057  | 0.093452         |
| 5PX         | 0.07805  | 0.006092        | 0.71336  | 0.508882         |
| 5PY         | -0.10299 | 0.010607        | 1.15193  | 1.326943         |
| 5PZ         | 0.04518  | 0.002041        | -0.44515 | 0.198159         |
| 6D 0        | 0.00573  | 3.28E-05        | 0.00241  | 5.81E-06         |
| 6D+1        | 0.01385  | 0.000192        | 0.00992  | 9.84E-05         |
| 6D-1        | -0.00114 | 1.3E-06         | 0.00447  | 2E-05            |
| 6D+2        | -0.0035  | 1.23E-05        | -0.00008 | 6.4E-09          |
| 6D-2        | -0.00784 | 6.15E-05        | 0.01018  | 0.000104         |
| C2 1S       | -0.00929 | 8.63E-05        | -0.00185 | 3.42E-06         |
| 2S          | -0.01496 | 0.000224        | -0.00295 | 8.7E-06          |

|      |          |          |          |          |
|------|----------|----------|----------|----------|
| 2PX  | 0.00513  | 2.63E-05 | -0.01168 | 0.000136 |
| 2PY  | -0.0428  | 0.001832 | 0.03855  | 0.001486 |
| 2PZ  | 0.09884  | 0.009769 | 0.04129  | 0.001705 |
| 3S   | 0.04269  | 0.001822 | 0.0103   | 0.000106 |
| 3PX  | 0.00543  | 2.95E-05 | -0.01945 | 0.000378 |
| 3PY  | -0.0625  | 0.003906 | 0.05773  | 0.003333 |
| 3PZ  | 0.14457  | 0.0209   | 0.06536  | 0.004272 |
| 4S   | 0.05059  | 0.002559 | 0.1307   | 0.017082 |
| 4PX  | 0.00232  | 5.38E-06 | -0.07198 | 0.005181 |
| 4PY  | -0.05807 | 0.003372 | 0.10723  | 0.011498 |
| 4PZ  | 0.12045  | 0.014508 | 0.08496  | 0.007218 |
| 5S   | -0.0114  | 0.00013  | 0.76029  | 0.578041 |
| 5PX  | -0.01674 | 0.00028  | -0.92145 | 0.84907  |
| 5PY  | 0.06286  | 0.003951 | 0.06975  | 0.004865 |
| 5PZ  | 0.01861  | 0.000346 | 0.29263  | 0.085632 |
| 6D 0 | -0.00596 | 3.55E-05 | 0.00315  | 9.92E-06 |
| 6D+1 | -0.01353 | 0.000183 | 0.00875  | 7.66E-05 |
| 6D-1 | 0.0007   | 4.9E-07  | 0.0046   | 2.12E-05 |
| 6D+2 | 0.00259  | 6.71E-06 | -0.00152 | 2.31E-06 |
| 6D-2 | 0.00474  | 2.25E-05 | 0.01156  | 0.000134 |

\* The date of 5 tracks is not used in the calculated for the proportion
